# Supplementary material for: Mechanochemical synthesis of (hetero)aryl Au(i) complexes
Source: Royal Society of Chemistry journal article supplement (doi:10.1039/d0gc02263b), 2020-01-01

# **Mechanochemical Synthesis of (Hetero)Aryl Au(I) Complexes**

## **Supporting Information**

# Index

|                                                                                        |           |
|----------------------------------------------------------------------------------------|-----------|
| <b>Index .....</b>                                                                     | <b>2</b>  |
| <b>General Remarks .....</b>                                                           | <b>3</b>  |
| <b>Transmetalation from boronic acids .....</b>                                        | <b>5</b>  |
| General procedure for spectroscopic yields in Table 1 and Scheme 1 (Procedure A1)..... | 5         |
| General procedure for isolated yields in Scheme 1 (Procedure A2).....                  | 5         |
| Synthesis and characterization of aryl complexes <b>2a–i,k,l</b> (Scheme 1) .....      | 6         |
| <b>C–H Auration of (hetero)arenes.....</b>                                             | <b>11</b> |
| General procedure for spectroscopic yields in Table 2 (Procedure B1) .....             | 11        |
| General procedure for isolated yields in Schemes 2 and 3 (Procedure B2) .....          | 11        |
| Synthesis and characterization of haloaryl complexes <b>3a–g</b> (Scheme 2) .....      | 12        |
| <b>Synthesis and characterization of heteroaryl complexes 4a–e (Scheme 3) .....</b>    | <b>14</b> |
| <b>Synthesis and characterization of NHC complexes 5a–e (Scheme 4).....</b>            | <b>16</b> |
| <b>Synthesis and Characterization of complexes in Figure 2 .....</b>                   | <b>18</b> |
| <b>C–H auration mechanistic studies (Schemes 5–7) .....</b>                            | <b>20</b> |
| Experimental procedure for Scheme 5 .....                                              | 20        |
| Experimental procedure for Scheme 6 .....                                              | 20        |
| Preparation and characterization of <b>S4</b> .....                                    | 21        |
| Procedure for solution-phase aryl exchange experiments (Scheme S1) .....               | 22        |
| Procedure for Scheme 7 .....                                                           | 23        |
| <b>Computational details.....</b>                                                      | <b>25</b> |
| <b>Crystallographic data .....</b>                                                     | <b>31</b> |
| <b>References.....</b>                                                                 | <b>36</b> |
| <b>NMR Spectra.....</b>                                                                | <b>37</b> |

## General Remarks

$^1\text{H}$ ,  $^{13}\text{C}$ ,  $^{19}\text{F}$  and  $^{31}\text{P}$  NMR spectra were recorded on an Agilent MR400-DD2 spectrometer ( $^1\text{H}$ : 399.97 MHz,  $^{13}\text{C}$ : 100.58 MHz,  $^{19}\text{F}$ : 376.32 MHz,  $^{31}\text{P}$ : 161.92 MHz) or on a Bruker Avance Neo (TXO) spectrometer ( $^1\text{H}$ : 500.16 MHz,  $^{13}\text{C}$ : 125.78 MHz) at room temperature (25 °C).  $^1\text{H}$  and  $^{13}\text{C}$  shifts were referenced indirectly to tetramethylsilane using the residual solvent peaks of DMSO- $d_6$  ( $^1\text{H}$ : 2.50 ppm,  $^{13}\text{C}$ : 39.52 ppm),  $\text{C}_6\text{D}_6$  ( $^1\text{H}$ : 7.16 ppm,  $^{13}\text{C}$ : 128.06 ppm) and  $\text{CDCl}_3$  ( $^1\text{H}$ : 7.26 ppm,  $^{13}\text{C}$ : 77.16 ppm).  $^{19}\text{F}$ , and  $^{31}\text{P}$  chemical shifts were referenced based on instrument calibration with an external standard ( $^{19}\text{F}$ :  $\text{CFCl}_3$ ,  $^{31}\text{P}$ : 85%  $\text{H}_3\text{PO}_4$  (aq)). Unless otherwise stated,  $^{31}\text{P}$  spectra was recorded with  $^1\text{H}$  decoupling.  $^1\text{H}$  and  $^{31}\text{P}$  NMR spectra used for quantification was recorded with 30 s relaxation delay and 32 scans (or equivalent to afford  $\text{S/N} > 250:1$ ). Chemical shifts are reported in ppm and coupling constants (J) in Hz. Peak multiplicities are abbreviated as follows: s (singlet), d (doublet), t (triplet), appt (apparent triplet), q (quartet), hept (heptet) and m (multiplet).

Unless otherwise stated, all reagents were obtained commercially and used without further purification. Ethanol (99.5%, analytical grade) was purchased from Solvaco. KOH (100%, Honeywell) was ground from pellets with mortar and pestle into a fine powder and used immediately. Deionized water was used for all reactions and purifications.

Phenyl-, 3-tolyl-, 4-methoxyphenyl-, 4-styrenyl-, and 3-thiophenylboronic acid were recrystallized from hot water and stored at  $-22\text{ }^\circ\text{C}$  prior to use. 2-Methoxyphenyl-, 4-chlorophenyl-, 4-iodophenyl-, and 4-(trifluoromethyl)phenylboronic acid were recrystallized from hot water and a minimal amount of DMSO and stored at  $-22\text{ }^\circ\text{C}$  prior to use. 9-Phenyl-9H-carbazol-3-yl boronic acid was suspended in a mixture of hot water and DMSO for approximately 1 h. The hot suspension was vacuum-filtered, the filtrate was allowed to cool to ambient temperature, and the precipitated boronic acid was collected by vacuum filtration and stored  $-22\text{ }^\circ\text{C}$  prior to use.

3-Tolyl potassium 2-hydroxymethyl-2-methylpropane-1,3-diol trialkoxyborate was prepared according to a literature procedure.<sup>1</sup>

Thin layer chromatography (TLC) was carried out using aluminium-backed plates coated with Silica gel 60 (0.20 mm, UV 254) and visualized under ultraviolet light ( $\lambda = 254\text{ nm}$ ) or by thermal decomposition. Purification by column chromatography was performed using Silica gel 60 H (particle size 0.063-0.100 mm).

**High resolution mass spectrometry:** High-resolution electrospray ionisation mass spectrometry was performed on a Thermo Scientific LTQ Orbitrap velos pro instrument, or on a microTOF II Focus instrument (Bruker Daltonics, Coventry, UK). High-resolution nanospray ionisation was performed on a Synapt G2S instrument (Waters, Manchester, UK) using a Triversa chip based nanospray source (Advion Biosciences, Norwich, UK).

**X-ray crystallography:** Single crystals of **3d** and **3f** suitable for X-ray diffraction analysis were obtained by recrystallization from layered CH<sub>2</sub>Cl<sub>2</sub>/pentane in a 5 mm diameter NMR tube at ambient temperature in the dark. All the measurements performed using graphite-monochromatized MoK $\alpha$  radiation at 170K using a Bruker D8 APEX-II equipped with a CCD camera. Data reduction was performed with SAINT<sup>2</sup> and CrysAlisPro (Rigaku OD). Absorption corrections for the area detector were performed using SADABS.<sup>3</sup> The structure was solved by direct methods and refined by full-matrix least-squares techniques against F<sup>2</sup> using all data (SHELXT and SHELXL)<sup>4</sup> implemented in OLEX2.<sup>5</sup> All non-hydrogen atoms were refined with anisotropic displacement parameters if not stated otherwise in the cif files. Hydrogen atoms constrained in geometric positions to their parent atoms.

**Milling details:** All milling reactions were conducted using an InSolido Technologies IST 636 High Energy Mixer Mill in Teflon™ (PTFE) vessels (14 mL inner volume) from InSolido Technologies and using stainless steel balls (15 mm diameter) weighing 13.6 g (Figure S1).

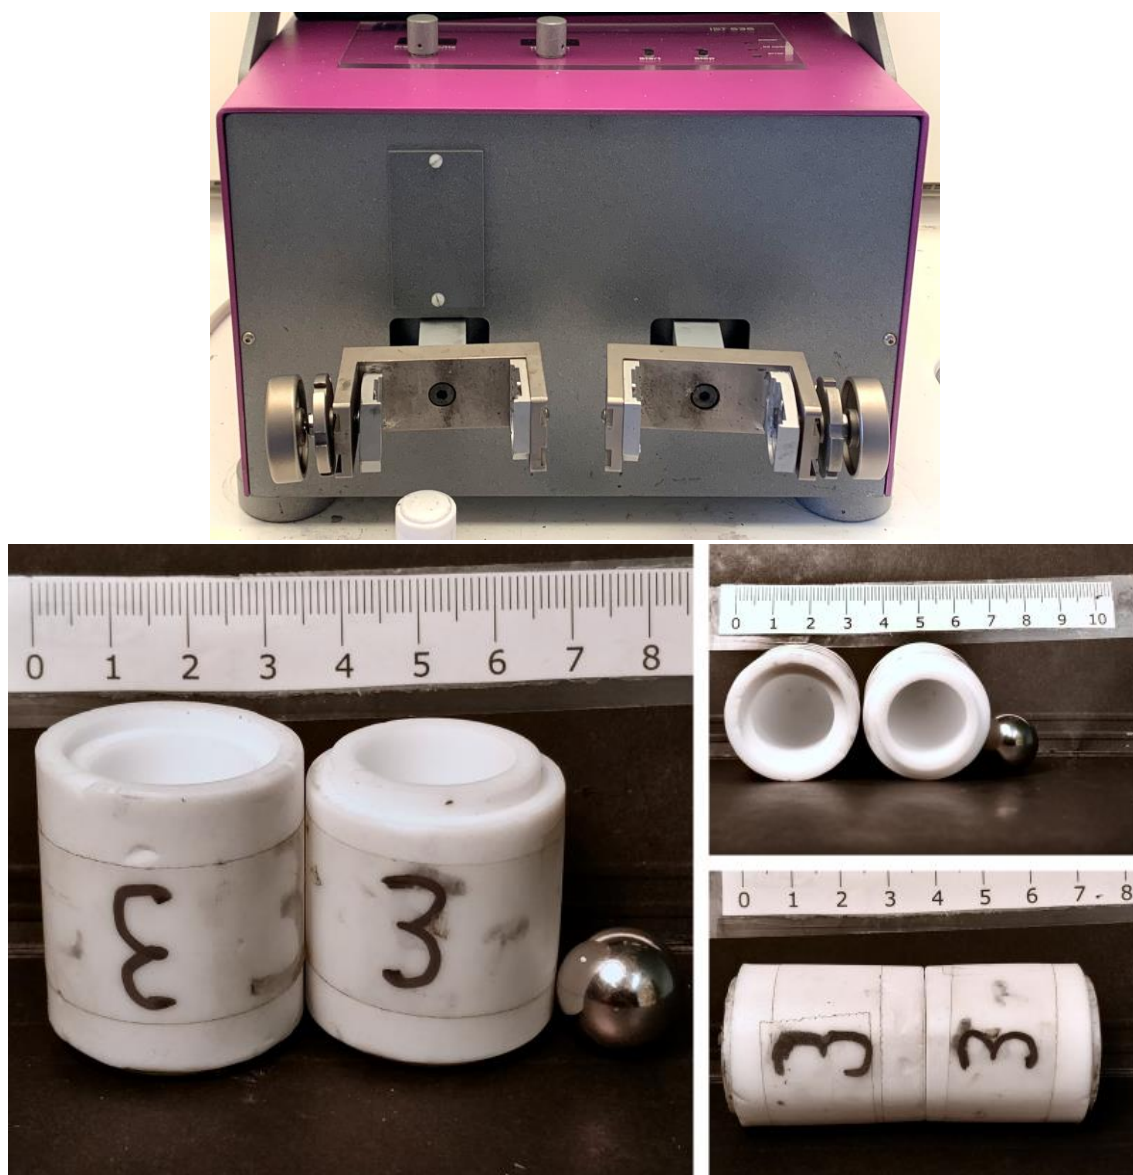

Figure S1. InSolido Technologies IST 636 High Energy Mixer Mill (top); Teflon™ vessels and stainless steel milling ball (bottom).

## Transmetalation from boronic acids

### General procedure for spectroscopic yields in Table 1 and Scheme 1 (Procedure A1)

R<sub>3</sub>PAuCl (0.10 mmol, 1.0 equiv.), boronic acid (0.10 mmol, 1.0 equiv.) and additives (KOH powder (0.12 mmol, 1.2 equiv.) and H<sub>2</sub>O (0.10 mL) for entries in Scheme 1) were added to a 14 mL Teflon™ vessel together with one stainless steel ball (15 mm diameter, 13.6 g). The vessel was sealed and subjected to milling for 1 h at 30 Hz. The reaction mixture was extracted with CH<sub>2</sub>Cl<sub>2</sub>\* (2 x 5 mL); the combined extractions were washed with H<sub>2</sub>O (20 mL), and the aqueous layer was extracted with CH<sub>2</sub>Cl<sub>2</sub>\* (2 x 10 mL). The organic layers were combined and dried over Na<sub>2</sub>SO<sub>4</sub>. Solids were removed by vacuum filtration, and the filtrate was concentrated to dryness *in vacuo*. Product yield were determined by <sup>31</sup>P NMR spectroscopy (d1 = 30 s; S/N > 250:1) based on ratios of signal integration for starting R<sub>3</sub>PAuCl and product peaks.

\*CH<sub>2</sub>Cl<sub>2</sub> was used only to ensure full recovery of R<sub>3</sub>PAu(I) species for accurate quantification as part of the method development. It was substituted by EtOAc in subsequent experiments for actual product isolation (*vide infra*).

### General procedure for isolated yields in Scheme 1 (Procedure A2)

R<sub>3</sub>PAuCl (0.10 mmol, 1.0 equiv.) and boronic acid (0.12 mmol, 1.2 equiv.) were added to a 14 mL Teflon™ vessel. KOH was added as a stock solution (1.25 M (aq), 0.12 mL, 0.15 mmol, 1.5 equiv.) together with one stainless steel ball (15 mm diameter, 13.6 g). The vessel was sealed and subjected to milling for 1 h at 30 Hz. The reaction mixture was extracted with EtOAc (4 x 5 mL). The stainless steel ball was briefly sonicated in EtOAc (5 mL) to extract adsorbed material. The combined organic fractions were washed with H<sub>2</sub>O (20 mL), and the aqueous layer was extracted with EtOAc (2 x 10 mL). The organic layers were combined and dried over Na<sub>2</sub>SO<sub>4</sub>. Solids were removed by vacuum filtration and the filtrate was concentrated *in vacuo*. The resulting residue was re-dissolved in a minimal amount of EtOAc and filtered through a tightly packed plug of Celite. Unless otherwise stated, the filtrate was concentrated to dryness *in vacuo* to afford analytically pure product.

## Synthesis and characterization of aryl complexes **2a–i,k,l** (Scheme 1)

### 3-Tolyl(triphenylphosphine)gold(I) (**2a**)<sup>1</sup>

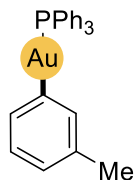

Procedure A1 afforded **2a** in >99% spectroscopic yield.

Procedure A2 afforded isolated **2a** as a colourless solid (50 mg, 93%). Spectral data accord with previously reported values.

### 2-Methoxyphenyl(triphenylphosphine)gold(I) (**2b**)<sup>6</sup>

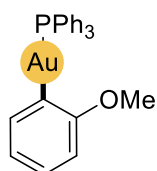

Procedure A1 afforded **2b** in >99% spectroscopic yield.

Procedure A2 afforded isolated **2b** as a colourless solid (48 mg, 86%). Spectral data accord with previously reported values.

### 2-Methylphenyl(tricyclohexylphosphine)gold(I) (**2c**)<sup>7</sup>

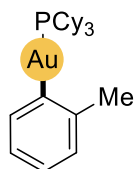

A modified version of procedure A1 using 2.0 equiv. KOH powder afforded **2c** in 90% spectroscopic yield.

A modified version of Procedure A2 using 3.0 equiv. KOH (2.5 M (aq), 0.12 mL) with milling at 25 Hz afforded **2c** as a colourless solid (51 mg, 86%). Spectral data accord with previously reported values.

<sup>1</sup>H and <sup>31</sup>P NMR characterization data for spectroscopic yield determination in CDCl<sub>3</sub>: <sup>1</sup>H NMR (400 MHz, CDCl<sub>3</sub>) δ 7.46–7.38 (m, 1H), 7.18 (d, *J* = 7.3 Hz, 1H), 7.10 (dd, *J* = 7.4, 7.3 Hz, 1H), 6.98 (dd, *J* = 7.4, 7.4 Hz, 1H), 2.54 (s, 3H), 2.12–1.95 (m, 8H), 1.92–1.82 (m, 7H), 1.80–1.68 (m, 3H), 1.60–1.49 (m, 5H), 1.39–1.17 (m, 10H); <sup>31</sup>P NMR (162 MHz, CDCl<sub>3</sub>) δ 57.4.

#### 4-Methoxyphenyl(triphenylphosphine)gold(I) (**2d**)<sup>8</sup>

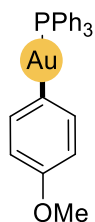

Procedure A1 afforded **2d** in 92% spectroscopic yield.

A modified version of Procedure A2 using 1.4 equiv. Ar-B(OH)<sub>2</sub> afforded **2d** as a colourless solid (55 mg, 97%). Spectral data accord with previously reported values.

#### Phenyl(triphenylphosphine)gold(I) (**2e**)<sup>9</sup>

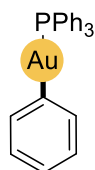

Procedure A1 afforded **2e** in >99% spectroscopic yield.

Procedure A2 afforded isolated **2e** as a colourless solid (50 mg, 94%). Spectral data accord with previously reported values.

<sup>1</sup>H and <sup>31</sup>P NMR characterization data for spectroscopic yield determination in CDCl<sub>3</sub>: <sup>1</sup>H NMR (400 MHz, CDCl<sub>3</sub>) δ 7.7–7.5 (m, 8H), 7.5–7.4 (m, 9H), 7.3 (appt, *J* = 7.6 Hz, 2H), 7.1 (m, 1H); <sup>31</sup>P NMR (162 MHz, CDCl<sub>3</sub>) δ 43.5.

#### 4-Chlorophenyl(triphenylphosphine)gold(I) (**2f**)<sup>1</sup>

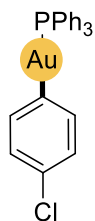

Procedure A1 afforded **2f** in 86% spectroscopic yield.

Procedure A2 afforded isolated **2f** as a colourless solid (55 mg, 97%). Spectral data accord with previously reported values.

#### 4-Iodophenyl(triphenylphosphine)gold(I) (**2g**)<sup>1</sup>

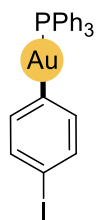

Procedure A1 afforded **2g** in 83% spectroscopic yield.

An isolated sample of **2g** was prepared by a modified version of Procedure A2: 2.5 equiv. KOH (2.5 M (aq), 0.10 mL) was used and milling was conducted at 25 Hz for 2 h. After Celite plug filtration, volatiles were removed *in vacuo*, and the resulting solid residue was washed with a minimal amount of EtOAc. Residual solvent was removed *in vacuo* to afford **2g** as a colourless solid (58 mg, 87%). Spectral data accord with previously reported values.

#### 4-Vinylphenyl(triethylphosphine)gold(I) (**2h**)<sup>10</sup>

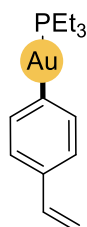

A modified version of procedure A1 using 2.0 equiv. KOH powder afforded **2h** in 93% spectroscopic yield.

An isolated sample of **2h** was prepared by a modified version of Procedure A2: 3.0 equiv. KOH (2.5 M (aq), 0.10 mL) were used and milling was conducted at 25 Hz. After Na<sub>2</sub>SO<sub>4</sub> drying, filtration and evaporation, the residue was dissolved in a minimal amount of pentane and filtered through a tightly packed Celite plug and solvent removed *in vacuo* to afford **2h** as a brown oil (39 mg, 93%). Spectral data accord with previously reported values.

<sup>1</sup>H and <sup>31</sup>P NMR characterization data for spectroscopic yield determination in CDCl<sub>3</sub>: <sup>1</sup>H NMR (400 MHz, CDCl<sub>3</sub>) δ 7.45 (dd, *J*<sub>H-H</sub> = 7.7, *J*<sub>P-H</sub> = 4.3 Hz, 2H), 7.31 (d, *J*<sub>H-H</sub> = 7.7 Hz, 2H), 6.67 (dd, *J*<sub>H-H</sub> = 17.6, 10.9 Hz, 1H), 5.67 (d, *J*<sub>H-H</sub> = 17.6 Hz, 1H), 5.09 (d, *J*<sub>H-H</sub> = 10.9 Hz, 1H), 1.82 (dq, *J*<sub>P-H</sub> = 7.9 Hz, *J*<sub>H-H</sub> = 7.9 Hz, 6H), 1.23 (dt, *J*<sub>P-H</sub> = 16.2, *J*<sub>H-H</sub> = 8.7 Hz, 9H); <sup>31</sup>P NMR (162 MHz, CDCl<sub>3</sub>) δ 40.7.



**[(4-Trifluoromethyl)phenyl](triphenylphosphine)gold(I) (**2i**)**<sup>9</sup>

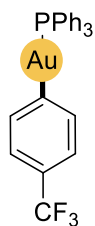

Procedure A1 afforded **2i** in >99% spectroscopic yield.

An isolated sample of **2i** was prepared by a modified version of Procedure A2: after Celite plug filtration and evaporation, the resulting solid residue was washed with pentane (4 x 1 mL) to afford **2i** as a brown solid (51 mg, 84%). Spectral data accord with previously reported values.

<sup>1</sup>H and <sup>31</sup>P NMR characterization data for spectroscopic yield determination in CDCl<sub>3</sub>: <sup>1</sup>H NMR (400 MHz, CDCl<sub>3</sub>) δ 7.7–7.6 (m, 2H), 7.6–7.6 (m, 6H), 7.6–7.4 (m, 11H); <sup>31</sup>P NMR (162 MHz, CDCl<sub>3</sub>) δ 43.2.

**3-Nitrophenyl(triphenylphosphine)gold(I) (**2j**)**<sup>11</sup>

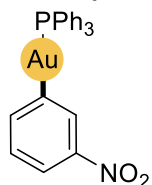

Procedure A1 afforded **2j** in 23% spectroscopic yield. Spectral data accord with previously reported values.

**3-Thiophenyl(triphenylphosphine)gold(I) (**2k**)**<sup>1</sup>

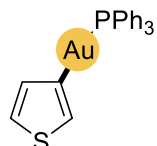

Procedure A1 afforded **2k** in >99% spectroscopic yield.

Procedure A2 afforded isolated **2k** as a colourless solid (52 mg, 96%). Spectral data accord with previously reported values.

**(9-Phenyl-9H-carbazol-3-yl)(triphenylphosphine)gold(I) (**2l**)<sup>1</sup>**

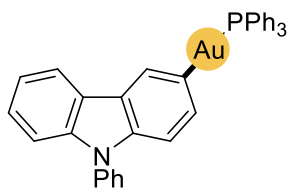

A modified version of procedure A1 using 2.0 equiv. KOH powder afforded **2l** in >99% spectroscopic yield.

An isolated sample of **2l** was prepared by a modified version of Procedure A2: 1.4 equiv. Ar-B(OH)<sub>2</sub> and 3.0 equiv. KOH (2.5 M (aq), 0.10 mL) were used and milling was conducted at 36 Hz. After Na<sub>2</sub>SO<sub>4</sub> drying, filtration and evaporation, the resulting solid residue was washed 3x with a minimal amount of EtOAc. Residual solvent was removed *in vacuo* to afford **2l** as a colourless solid (44 mg, 63%). Spectral data accord with previously reported values.

**(3-Pyridyl)(triphenylphosphine)gold(I) (**2m**)**

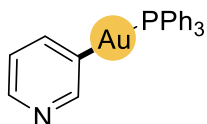

Procedure A1 afforded **2m** in trace amounts (spectroscopic).

**[(1-Vinyl)phenyl](triphenylphosphine)gold(I) (**2n**)<sup>1</sup>**

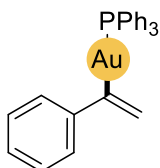

Procedure A1 afforded **2n** in 22% spectroscopic yield. Spectral data accord with previously reported values.

## C–H Auration of (hetero)arenes

### General procedure for spectroscopic yields in Table 2 (Procedure B1)

R<sub>3</sub>PAuCl (0.10 mmol, 1.0 equiv.), arene and base were added to a 14 mL Teflon™ vessel together with one stainless steel ball (15 mm diameter, 13.6 g). The vessel was sealed and subjected to milling for 1 h at 30 Hz. The reaction mixture was extracted with CH<sub>2</sub>Cl<sub>2</sub>\* (2 x 5 mL); the combined extractions were washed with H<sub>2</sub>O (20 mL), and the aqueous layer was extracted with CH<sub>2</sub>Cl<sub>2</sub>\* (2 x 10 mL). The organic layers were combined and dried over Na<sub>2</sub>SO<sub>4</sub>. Solids were removed by vacuum filtration, and the filtrate was concentrated to dryness *in vacuo*. Product yield was determined by <sup>31</sup>P NMR spectroscopy (d1 = 30 s; S/N > 250:1) based on ratios of signal integration for starting R<sub>3</sub>PAuCl and product peaks.

\*CH<sub>2</sub>Cl<sub>2</sub> was used only to ensure full recovery of R<sub>3</sub>PAu(I) species for accurate quantification as part of the method development. It was substituted by EtOAc in subsequent experiments for actual product isolation (*vide infra*).

### General procedure for isolated yields in Schemes 2 and 3 (Procedure B2)

R<sub>3</sub>PAuCl (0.10 mmol, 1.0 equiv.), arene (4.0 equiv.) and base (4.0 equiv.; KO<sup>t</sup>Bu powder for entries in Scheme 2, KOH powder for entries in Scheme 3) were added to a 14 mL Teflon™ vessel together with one stainless steel ball (15 mm diameter, 13.6 g). The vessel was sealed and subjected to milling for 1 h at 30 Hz. The reaction mixture was extracted with EtOAc (4 x 5 mL); the combined extractions were washed with H<sub>2</sub>O (20 mL), and the aqueous layer was extracted with EtOAc (2 x 10 mL). The organic layers were combined and dried over Na<sub>2</sub>SO<sub>4</sub>. Solids were removed by vacuum filtration and the filtrate was concentrated *in vacuo*. Additional purification was performed as necessary (see individual entries for details).

## Synthesis and characterization of haloaryl complexes **3a–g** (Scheme 2)

### 2,6-Dichlorophenyl(triethylphosphine)gold(I) (**3a**)<sup>12</sup>

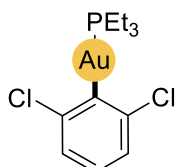

A modified version of Procedure B2 with milling conducted for 1.5 h afforded **3a** as a colourless oil (42 mg, 92%) after filtration of the dried EtOAc extractions through a short silica gel pad. Spectral data accord with previously reported values.

### 2,6-Dibromophenyl(triethylphosphine)gold(I) (**3b**)<sup>12</sup>

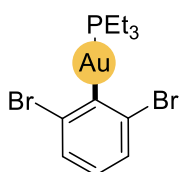

A modified version of Procedure B2 with milling conducted for 1.5 h afforded **3b** as a colourless oil (50 mg, 91%) after filtration of the dried EtOAc extractions through a short silica gel pad. Spectral data accord with previously reported values.

### (2,3-dibromo-5-chloropyridin-4-yl)(triethylphosphine)gold(I) (**3c**)

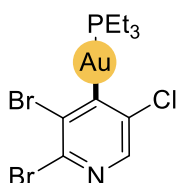

An isolated sample of **3c** was prepared by a modified version of Procedure B2: after Celite plug filtration and evaporation, the resulting residue was washed 3x with a minimal amount of pentane. Residual solvent was removed *in vacuo* to afford **3c** as a yellow solid (41 mg, 70%). <sup>1</sup>H NMR (400 MHz, CDCl<sub>3</sub>) δ 8.19 (d, *J*<sub>H-P</sub> = 1.9 Hz, 1H), 1.87 (dq, *J*<sub>H-P</sub> = 9.5, *J*<sub>H-H</sub> 7.6 Hz, 6H), 1.28 (dt, *J*<sub>H-P</sub> = 18.1, *J*<sub>H-H</sub> = 7.6 Hz, 9H); <sup>13</sup>C NMR (101 MHz, CDCl<sub>3</sub>) δ 144.8 (d, *J*<sub>C-P</sub> = 4 Hz), 141.0 (d, *J*<sub>C-P</sub> = 7 Hz), 139.6 (d, *J*<sub>C-P</sub> = 4 Hz), 133.8 (d, *J*<sub>C-P</sub> = 4 Hz), 18.2 (d, *J*<sub>C-P</sub> = 32 Hz), 9.3, AuC not observed; <sup>31</sup>P NMR (162 MHz, CDCl<sub>3</sub>) δ 36.9; HRMS (ES+) calcd. for C<sub>11</sub>H<sub>17</sub>AuBr<sub>2</sub>ClNP [M+H]<sup>+</sup>: 583.8819 found 583.8837

### 2,6-Dichlorophenyl(tri-*tert*-butylphosphine)gold(I) (**3d**)

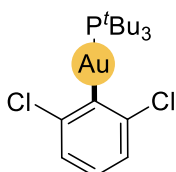

A modified version of Procedure B2 with milling conducted for 2 h at 36 Hz afforded **3d** as a colourless solid (50 mg, 91%). <sup>1</sup>H NMR (400 MHz, C<sub>6</sub>D<sub>6</sub>) δ 7.35 (dd, *J*<sub>H-H</sub> = 7.9, *J*<sub>H-P</sub> = 1.5 Hz, 2H), 6.64

(dd,  $J_{H-H} = 7.9, 7.9$  Hz, 1H), 1.21 (d,  $J_{H-P} = 12.9$  Hz, 27H);  $^{13}\text{C}$  NMR (101 MHz,  $\text{C}_6\text{D}_6$ )  $\delta$  174.6 (d,  $J = 100$  Hz), 144.3 (d,  $J = 4$  Hz), 127.7, 126.3 (d,  $J = 4$  Hz), 39.0 (d,  $J = 16$  Hz), 32.2 (d,  $J = 5$  Hz);  $^{31}\text{P}$  NMR (162 MHz,  $\text{C}_6\text{D}_6$ )  $\delta$  90.4; HRMS (ES+) calcd. for  $\text{C}_{30}\text{H}_{57}\text{Au}_2\text{Cl}_2\text{P}_2$  [ $\text{M} + \text{AuP}^t\text{Bu}_3$ ] $^+$ : 943.2644 found 943.2673

#### Pentafluorophenyl(tri-*tert*-butylphosphine)gold(I) (**3e**)<sup>12</sup>

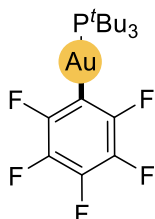

Procedure B2 afforded isolated **3e** as a colourless microcrystalline solid (50 mg, 89%). Spectral data accord with previously reported values.

A repeat of this procedure on 0.5 mmol scale afforded 230 mg (81%) of product.

#### (3-chloro-5-fluoropyridin-4-yl)(tri-*tert*-butylphosphine)gold(I) (**3f**)

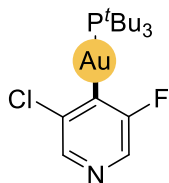

An isolated sample of **3f** was prepared by a modified version of Procedure B2: after filtration and concentration of the dried EtOAc extractions, silica gel chromatography (pentane/EtOAc 10:1) afforded **3f** as a colourless solid (46 mg, 90%).  $^1\text{H}$  NMR (400 MHz,  $\text{CDCl}_3$ )  $\delta$  8.33 (dd,  $J_{H-F} = 2.6$  Hz,  $J_{H-H} = 1.6$  Hz, 1H), 8.23 (dd,  $J_{H-F} = 2.6$  Hz,  $J_{H-H} = 1.6$  Hz, 1H), 1.56 (d,  $J_{H-P} = 13.2$  Hz, 27H);  $^{13}\text{C}$  NMR (126 MHz,  $\text{CDCl}_3$ )  $\delta$  167.23 (dd,  $J_{C-P} = 95$ ,  $J_{C-F} = 58$  Hz), 163.97 (dd,  $J_{C-F} = 241$ ,  $J_{C-P} = 3$  Hz), 142.94 (dd,  $J_{C-P} = J_{C-F} = 3$  Hz), 141.45 (dd,  $J_{C-P} = 17$ ,  $J_{C-F} = 4$  Hz), 133.31 (dd,  $J_{C-F} = 34$ ,  $J_{C-P} = 3$  Hz), 39.37 (d,  $J_{C-P} = 16$  Hz), 32.45 (d,  $J_{C-P} = 5$  Hz);  $^{19}\text{F}$  NMR (376 MHz,  $\text{CDCl}_3$ )  $\delta$  -104.08 (ddd,  $J_{F-P} = 6.2$  Hz,  $J_{F-H} = 2.6, 2.6$  Hz);  $^{31}\text{P}$  NMR (162 MHz,  $\text{CDCl}_3$ )  $\delta$  91.2 (d,  $J_{P-F} = 6.2$  Hz); HRMS (ES+) calcd. for  $\text{C}_{17}\text{H}_{30}\text{AuClFNP}$  [ $\text{M} + \text{H}$ ] $^+$ : 530.1448 found 530.1425

#### 2,4,6-trifluorophenyl(tri-*tert*-butylphosphine)gold(I) (**3g**)<sup>12</sup>

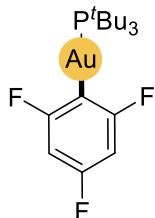

Procedure B2 afforded isolated **3g** as a colourless microcrystalline solid (48 mg, 91%). Spectral data accord with previously reported values.

## Synthesis and characterization of heteroaryl complexes **4a–e** (Scheme 3)

### Benzothiazol-2-yl(tri-*tert*-butylphosphine)gold(I) (**4a**)<sup>12</sup>

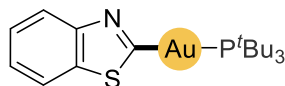

An isolated sample of **4a** was prepared by a modified version of Procedure B2: after filtration and concentration of the dried EtOAc extractions, silica gel chromatography (pentane/EtOAc 4:1) afforded **4a** as a colourless solid (45 mg, 85%). Spectral data accord with previously reported values.

### Benzoxazol-2-yl(tri-*tert*-butylphosphine)gold(I) (**4b**)<sup>12</sup>

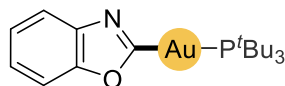

Procedure B1 using 4.0 equiv. KOH afforded **4b** in 47% spectroscopic yield with milling conducted at 30 Hz and in 93% yield at 36 Hz.

An isolated sample of **4a** was prepared by a modified version of Procedure B2: milling was conducted at 36 Hz. After filtration and concentration of the dried EtOAc extractions, silica gel chromatography (pentane/EtOAc 1:1 + 1% NEt<sub>3</sub>) afforded **4b** as a brown solid (44 mg, 85%). Spectral data accord with previously reported values.

### Thiophen-2-yl(tri-*tert*-butylphosphine)gold(I) (**4c**)

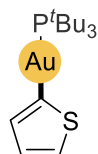

A modified version of Procedure B2 using 4.0 equiv. KO<sup>t</sup>Bu and with milling conducted at 36 Hz afforded **4c** as a colourless solid (42 mg, 88%). <sup>1</sup>H NMR (400 MHz, CDCl<sub>3</sub>) δ 7.60 (dd, *J*<sub>H-H</sub> = 4.7, *J*<sub>H-P</sub> = 1.2 Hz, 1H), 7.39 (ddd, *J*<sub>H-H</sub> = 4.8, 3.2 Hz, *J*<sub>H-P</sub> = 0.8 Hz, 1H), 7.10 (dd, *J*<sub>H-H</sub> = *J*<sub>H-P</sub> = 3.2 Hz, 1H), 1.55 (d, *J*<sub>H-P</sub> = 13.0 Hz, 27H); <sup>1</sup>H{<sup>31</sup>P} NMR (400 MHz, CDCl<sub>3</sub>) δ 7.60 (d, *J* = 4.7 Hz, 1H), 7.39 (dd, *J* = 4.7, 3.2 Hz, 1H), 7.10 (d, *J* = 3.2 Hz, 1H), 1.55 (s, 27H); <sup>13</sup>C NMR (101 MHz, CDCl<sub>3</sub>) δ 132.4 (d, *J* = 10 Hz), 127.1, 126.5 (d, *J* = 14 Hz), 38.9 (d, *J* = 16 Hz), 32.4, AuC not observed; <sup>31</sup>P NMR (162 MHz, CDCl<sub>3</sub>) δ 92.1; HRMS (ES<sup>+</sup>) calcd. for C<sub>16</sub>H<sub>31</sub>AuOPS [M+O+H]<sup>+</sup>: 499.1493 found 499.1467

**5-Bromothiophen-2-yl(tri-*tert*-butylphosphine)gold(I) (**4d**)<sup>12</sup>**

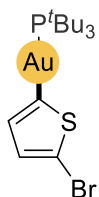

An isolated sample of **4d** was prepared by a modified version of Procedure B2: after filtration and concentration of the dried EtOAc extractions, the resulting residue was extracted with pentane (3 x 5 mL). Volatiles were removed *in vacuo* to afford **4d** as a colourless oil (46 mg, 82%). Spectral data accord with previously reported values.

**2-Bromothiazol-4-yl(tri-*tert*-butylphosphine)gold(I) (**4e**)<sup>12</sup>**

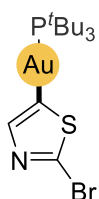

An isolated sample of **4e** was prepared by a modified version of Procedure B2: milling was conducted at 36 Hz. After filtration and concentration of the dried EtOAc extractions, silica gel chromatography (30% EtOAc + 1% NEt<sub>3</sub> in pentane) afforded **4e** as a yellow solid (25 mg, 44%). Spectral data accord with previously reported values.

## Synthesis and characterization of NHC complexes 5a–e (Scheme 4)

[N,N-Bis(2,6-diisopropylphenyl)imidazol-2-yl](2,4,6-trifluorophenyl)gold(I) (**5a**)<sup>13</sup>

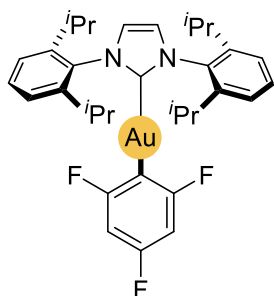

Procedure B2 using IPrAuCl (0.1 mmol) and 4.0 equiv. KO<sup>t</sup>Bu afforded **5a** as a colourless solid (59 mg, 82%). Spectral data accord with previously reported values.

[1,3-Bis(2,6-diisopropylphenyl)imidazol-2-yl](4-methoxyphenyl)gold(I) (**5b**)<sup>14</sup>

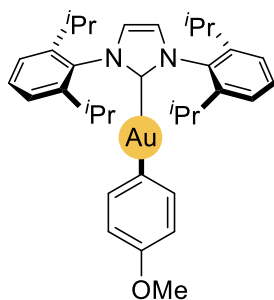

A modified version of Procedure A2 using IPrAuCl (0.1 mmol) and 1.4 equiv. Ar-B(OH)<sub>2</sub> afforded **2b** as a colourless solid (64 mg, 93%). Spectral data accord with previously reported values.

[1,3-Bis(2,6-diisopropylphenyl)imidazol-2-yl](3-thiophenyl)gold(I) (**5c**)<sup>1</sup>

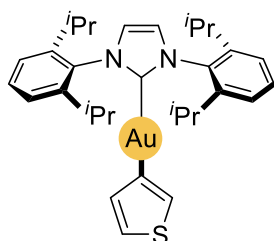

Procedure A2 using IPrAuCl (0.1 mmol) afforded isolated **5c** as a beige solid (65 mg, 98%). Spectral data accord with previously reported values.



**[1,3-Bis(2,6-diisopropylphenyl)imidazol-2-yl](4-iodophenyl)gold(I) (**5d**)**<sup>14</sup>

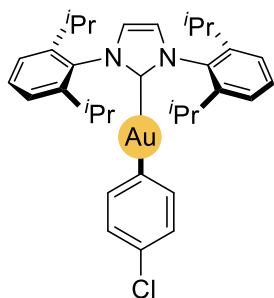

Procedure A2 using IPrAuCl (0.1 mmol) afforded isolated **5d** as a colourless solid (67 mg, 96%). Spectral data accord with previously reported values.

**[1,3-Bis(2,6-diisopropylphenyl)imidazol-2-yl](1-pyrenyl)gold(I) (**5e**)**<sup>15</sup>

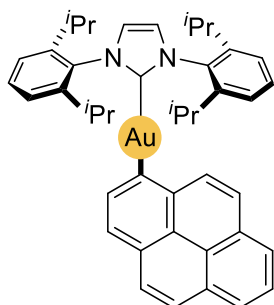

An isolated sample of **2j** was prepared by a modified version of Procedure A2: IPrAuCl (0.1 mmol), KOH powder (0.2 mmol, 2.0 equiv.) and 0.1 mL of H<sub>2</sub>O were used. After Na<sub>2</sub>SO<sub>4</sub> drying, filtration and evaporation, silica gel chromatography (pentane/EtOAc 10:1) afforded **5e** as a colourless solid (24 mg, 31%). Spectral data accord with previously reported values.

## Synthesis and Characterization of complexes in Figure 2

### 1,3,7-trimethyl-2,6-dioxo-2,3,6,7-tetrahydropurin-8-yl(tri-*tert*-butylphosphine)gold(I) (**S1**)<sup>12</sup>

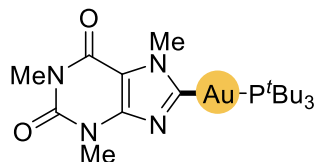

An isolated sample of **S1** was prepared by a modified version of Procedure B2 using 4.0 equiv. KOH: after EtOAc extraction, the combined organic layers were washed with H<sub>2</sub>O (20 mL) and brine (20 mL). The aqueous layers were extracted with EtOAc (2 x 10 mL) and the combined extractions were dried over Na<sub>2</sub>SO<sub>4</sub>. Solids were removed by vacuum filtration, and the filtrate was concentrated *in vacuo*. The resulting residue was washed 3x with a minimal amount of ice cold EtOAc. Residual solvent was removed *in vacuo* to afford **S1** as a colourless solid (39 mg, 67%). Spectral data accord with previously reported values.

### (2,6-difluoro-3-(2-(3-(trifluoromethyl)phenoxy)nicotinamido)phenyl)(triethylphosphine)gold(I) (**S2**)

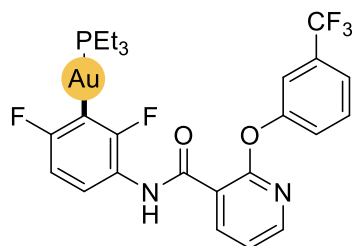

An isolated sample of **S2** was prepared by a modified version of Procedure B2: 1.5 equiv. arene and 4.0 equiv. KO<sup>*t*</sup>Bu were used. After filtering and concentrating the dried EtOAc extractions, silica gel chromatography (pentane/EtOAc 10:1) afforded **S2** as a colourless solid (47 mg, 66%). <sup>1</sup>H NMR (500 MHz, CDCl<sub>3</sub>) δ 9.90 (br s, 1H), 8.65 (dd, *J*<sub>H-H</sub> = 7.6, 2.0 Hz, 1H), 8.22–8.14 (m, 2H), 7.55–7.45 (m, 3H), 7.43–7.37 (m, 1H), 7.20–7.15 (m, 1H), 6.86–6.79 (m, 1H), 1.80 (dq, *J*<sub>H-P</sub> = 9.4 Hz, *J*<sub>H-H</sub> = 7.7 Hz, 6H), 1.18 (dt, *J*<sub>H-P</sub> = 17.9 Hz, *J*<sub>H-H</sub> = 7.7 Hz, 9H); <sup>13</sup>C NMR (126 MHz, CDCl<sub>3</sub>) δ 164.52 (ddd, *J*<sub>C-F</sub> = 230, 24 Hz, *J*<sub>C-P</sub> = 4 Hz), 160.5, 159.2, 152.6, 149.9, 142.7, 132.2 (d, *J* = 33 Hz), 130.1, 125.4, 122.3 (q, *J* = 4 Hz), 120.2, 120.0 (d, *J* = 8 Hz), 119.2 (q, *J* = 4 Hz), 117.8, 109.9 (dt, *J* = 32, 3 Hz), 18.0 (d, *J*<sub>C-P</sub> = 32 Hz), 9.0, (AuC not observed); <sup>19</sup>F NMR (376 MHz, CDCl<sub>3</sub>) δ –62.6 (s, 2F), –92.4 to –92.6 (m, 1F), –104.6 to –104.8 (m, 1F); <sup>31</sup>P NMR (162 MHz, CDCl<sub>3</sub>) δ 40.2 (dd, *J*<sub>P-F</sub> = 8.3 Hz); HRMS (Nanospray) calcd. for C<sub>25</sub>H<sub>26</sub>AuF<sub>5</sub>N<sub>2</sub>O<sub>2</sub>P [M+H]<sup>+</sup>: 709.1318, found 709.1326.

**(2,6-dichloro-3-(1-((4-chlorobenzyl)oxy)-2-(1*H*-imidazol-1-yl)ethyl)phenyl)(triethylphosphine)-gold(I) (**S3**)**

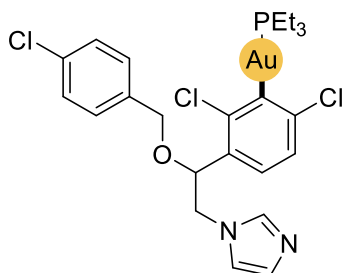

An isolated sample of **S3** was prepared by a modified version of Procedure B1: 0.1 mmol arene, 1.5 equiv. (Et<sub>3</sub>P)AuCl and 4.0 equiv. KO<sup>t</sup>Bu were used. The reaction mixture was extracted with CH<sub>2</sub>Cl<sub>2</sub> (2 x 5 mL); the combined extractions were washed with H<sub>2</sub>O (20 mL), and the aqueous layer was extracted with CH<sub>2</sub>Cl<sub>2</sub> (2 x 10 mL). The organic layers were combined and dried over Na<sub>2</sub>SO<sub>4</sub>. After filtering and concentrating the dried CH<sub>2</sub>Cl<sub>2</sub> extractions, silica gel chromatography (CH<sub>2</sub>Cl<sub>2</sub>/MeOH 20:1) afforded **S3** as a colourless semi-solid (40 mg, 57%). <sup>1</sup>H NMR (500 MHz, CDCl<sub>3</sub>) δ 7.54 (s, 1H), 7.31 (dd, *J* = 8.2, 1.7 Hz, 1H), 7.28–7.26 (m, 2H), 7.11–7.04 (m, 4H), 6.96 (s, 1H), 4.96 (dd, *J* = 8.3, 2.3 Hz, 1H), 4.45 (d, *J* = 11.9 Hz, 1H), 4.21 (dd, *J* = 14.5, 2.3 Hz, 1H), 4.17 (d, *J* = 11.9 Hz, 1H), 3.98 (dd, *J* = 14.5, 8.3 Hz, 1H), 1.90 (dq, *J*<sub>P-H</sub> = 9.2, *J*<sub>H-H</sub> = 7.7 Hz, 6H), 1.32 (dt, , *J*<sub>P-H</sub> = 18.0, *J*<sub>H-H</sub> = 7.7 Hz, 9H); <sup>13</sup>C NMR (126 MHz, CDCl<sub>3</sub>) δ 174.5 (d, *J*<sub>C-P</sub> = 108 Hz), 143.4 (d, *J*<sub>C-P</sub> = 4 Hz), 141.9 (d, *J*<sub>C-P</sub> = 4 Hz), 138.0, 136.0, 133.5, 132.5 (d, *J*<sub>C-P</sub> = 4 Hz), 129.0, 129.0, 128.6, 127.0 (d, *J*<sub>C-P</sub> = 4 Hz), 125.4, 119.8, 78.5, 70.4, 51.8, 18.2 (d, *J*<sub>C-P</sub> = 31 Hz), 9.1; <sup>31</sup>P NMR (162 MHz, CDCl<sub>3</sub>) δ 38.8; HRMS (ES+) calcd. for C<sub>24</sub>H<sub>30</sub>AuCl<sub>3</sub>N<sub>2</sub>OP [M+H]<sup>+</sup>: 695.0821, found 695.0848

## C–H auration mechanistic studies (Schemes 5–7)

### Experimental procedure for Scheme 5

Haloarene/heteroarene competition experiments were conducted according to a modified version of Procedure B1 using 0.1 mmol (*t*Bu<sub>3</sub>P)AuCl, 2.0 equiv. haloarene, 2.0 equiv. heteroarene, and 4.0 equiv. KO<sup>*t*</sup>Bu. Product ratios were determined from <sup>31</sup>P NMR (CDCl<sub>3</sub>) signal relative integrations.

### Experimental procedure for Scheme 6

Mechanochemical aryl exchange experiments were conducted according to a modified version of Procedure B1 using 0.1 mmol (*t*Bu<sub>3</sub>P)AuAr<sup>1</sup>, 1.0 equiv. Ar<sup>1</sup>H, 2.0 equiv. Ar<sup>2</sup>H, and 4.0 equiv. KO<sup>*t*</sup>Bu.

Determination of the final ratios between complexes **3e** and **4a** by <sup>31</sup>P NMR was complicated in these cases by the formation of a side-product whose signal overlapped with that of **3e**.

Complementary <sup>19</sup>F NMR analysis revealed the presence of additional fluoroaryl-containing species besides **3e**; these were subsequently identified as the known<sup>16</sup> compound 3-(*tert*-butoxy)-1,2,4,5-tetrafluorobenzene and the novel C<sub>6</sub>F<sub>4</sub>(O<sup>*t*</sup>Bu) complex **S4** (Figure S2; see below for preparation and characterization of an authentic sample). The integration area of the overlapping <sup>31</sup>P signals for **3e** and **S4** was thus deconvoluted by applying the ratio of the corresponding <sup>19</sup>F NMR signals, and the <sup>31</sup>P peak area for **3e** so resolved was compared to that of **4a** to give the true **3e**:**4a** ratio.

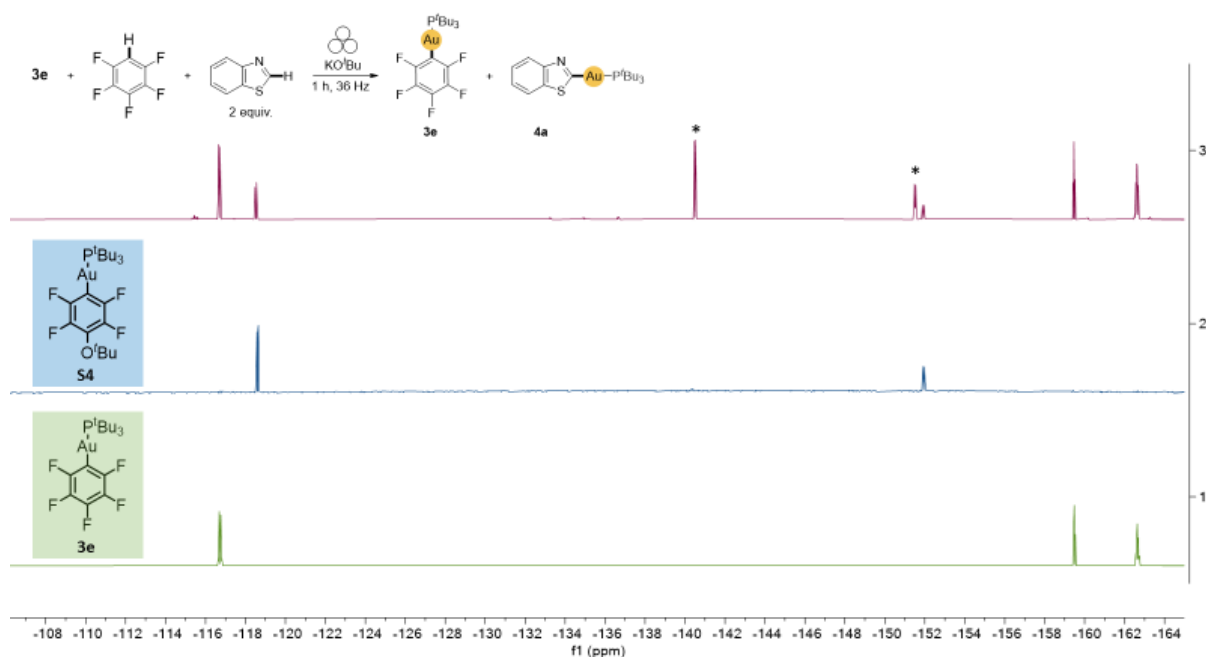

Figure S2: Comparison of the <sup>19</sup>F NMR spectrum for the aryl exchange experiment starting with **3e** with those for isolated **S4** and **3e**. Peaks in the top spectrum marked by an asterisk (\*) were assigned to the additional side-product 3-(*tert*-butoxy)-1,2,4,5-tetrafluorobenzene by comparison with previously reported chemical shifts.

## Preparation and characterization of **S4**

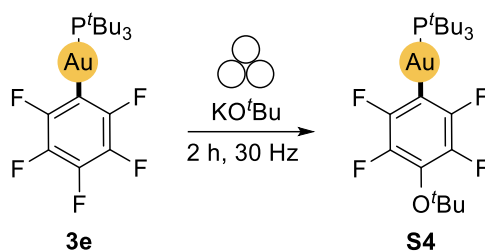

### (4-(tert-butoxy)-2,3,5,6-tetrafluorophenyl)(tri-tert-butylphosphine)gold(I) (**S4**)

Complex **3e** (57 mg, 0.1 mmol) and KO<sup>t</sup>Bu (112 mg, 1.0 mmol, 10 equiv.) were added to a 14 mL Teflon™ vessel together with one stainless steel ball. The vessel was sealed and subjected to milling for 2 h at 30 Hz. The reaction mixture was extracted with CH<sub>2</sub>Cl<sub>2</sub> (2 x 5 mL); the combined extractions were washed with H<sub>2</sub>O (20 mL), and the aqueous layer was extracted with CH<sub>2</sub>Cl<sub>2</sub> (2 x 10 mL). The organic layers were combined and dried over Na<sub>2</sub>SO<sub>4</sub>. Solids were removed by vacuum filtration, and the filtrate was concentrated to dryness *in vacuo*. The product **S4** was purified via preparative TLC (CH<sub>2</sub>Cl<sub>2</sub>/pentane 1:100) and isolated as a colourless solid (11 mg, 16%). <sup>1</sup>H NMR (400 MHz, CDCl<sub>3</sub>) δ 1.57 (d, *J*<sub>H-P</sub> = 13.2 Hz, 27H), 1.37 (dd, *J*<sub>H-F</sub> = 1.1 Hz, 1.1 Hz, 9H); <sup>19</sup>F NMR (376 MHz, CDCl<sub>3</sub>) δ –118.5 to –118.7 (m), –151.9 to –152.1 (m); <sup>31</sup>P NMR (162 MHz, CDCl<sub>3</sub>) δ 92.2 (p, *J* = 6.9 Hz).

## Procedure for solution-phase aryl exchange experiments (Scheme S1)

A 1-dram vial was charged with (*t*Bu<sub>3</sub>P)AuAr<sup>1</sup>, (0.1 mmol), Ar<sup>2</sup>H (4.0 equiv.), KO<sup>t</sup>Bu (4.0 equiv.), and DMF (0.3 mL). The reaction mixture was stirred at 50 °C for 15 h, diluted with CH<sub>2</sub>Cl<sub>2</sub> (5.0 mL) and filtered through a Celite plug. The filtrate was concentrated under reduced pressure, and product ratios were determined from <sup>31</sup>P NMR (CDCl<sub>3</sub>) signal relative integrations.

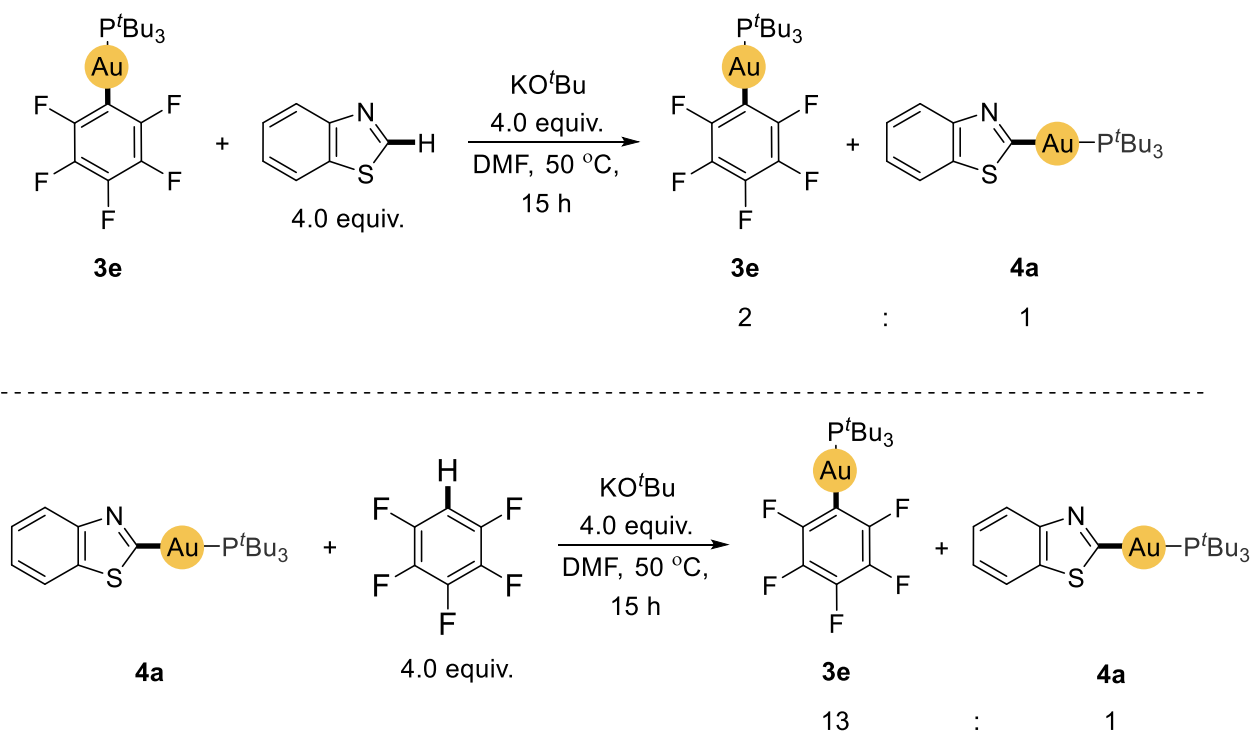

Scheme S1. Solution-phase aryl exchange experiments.

## Procedure for Scheme 7

The possible intermediacy of (<sup>t</sup>Bu<sub>3</sub>P)AuO<sup>t</sup>Bu (**6**) in the formation of C–H aured complexes was examined by a modified version of Procedure B1: (<sup>t</sup>Bu<sub>3</sub>P)AuCl (43 mg, 0.10 mmol) and KO<sup>t</sup>Bu (13 mg, 0.12 mmol, 1.2 equiv.) were subjected to milling for 1 h at 30 Hz. Arene (4.0 equiv.) was subsequently added, and milling was continued for another 1 h. After workup, product yields were determined by <sup>31</sup>P NMR spectroscopy.

In a separate experiment, the reaction mixture resulting from milling (<sup>t</sup>Bu<sub>3</sub>P)AuCl (43 mg, 0.10 mmol) with KO<sup>t</sup>Bu (22 mg, 0.20 mmol, 2.0 equiv.) was suspended in C<sub>6</sub>D<sub>6</sub> and filtered through a Celite plug. The components of the filtrate solution were subsequently analysed by NMR spectroscopy, with the major observed signals consistent with those expected for **6** (Figure S3): <sup>1</sup>H NMR (400 MHz, C<sub>6</sub>D<sub>6</sub>) δ 1.78 (s, 9H), 1.08 (d, *J* = 13.2 Hz, 27H); <sup>13</sup>C NMR (101 MHz, C<sub>6</sub>D<sub>6</sub>) δ 71.7 (d, *J*<sub>C-P</sub> = 2 Hz), 38.0 (d, *J*<sub>C-P</sub> = 21 Hz), 36.9 (d, *J*<sub>C-P</sub> = 2 Hz), 31.5 (d, *J*<sub>C-P</sub> = 4 Hz); <sup>31</sup>P NMR (162 MHz, C<sub>6</sub>D<sub>6</sub>) δ 81.43; **1D DOSY** (400 MHz, C<sub>6</sub>D<sub>6</sub>) *D* = 7.6 × 10<sup>−6</sup> cm<sup>2</sup>/sec (25 °C, array size = 15, diffusion delay = 100 ms, diffusion gradient length = 2 ms), estimated using MestreNova software to correspond to a molecular weight of 461 g/mol (cf. expected MW = 472 g/mol). **HRMS** (Nanospray) calcd. for C<sub>16</sub>H<sub>37</sub>AuOP [M+H]<sup>+</sup>: 473.2248, found 473.2251.

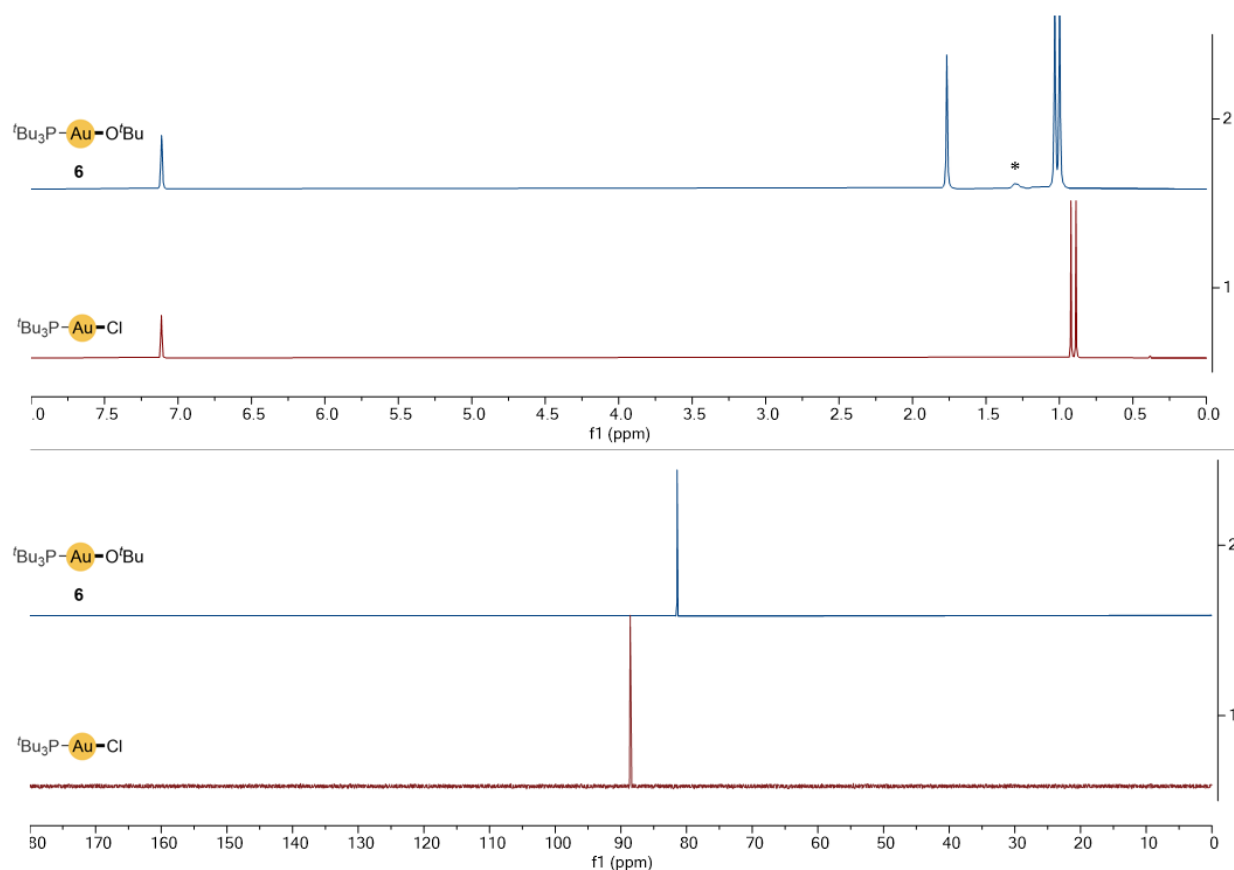

Figure S3: Comparison of the <sup>1</sup>H NMR (top) and <sup>31</sup>P NMR (bottom) spectra of **6** (blue) and (<sup>t</sup>Bu<sub>3</sub>P)AuCl (red). The peak in the <sup>1</sup>H spectrum marked by an asterisk (\*) was assigned to residual KO<sup>t</sup>Bu.

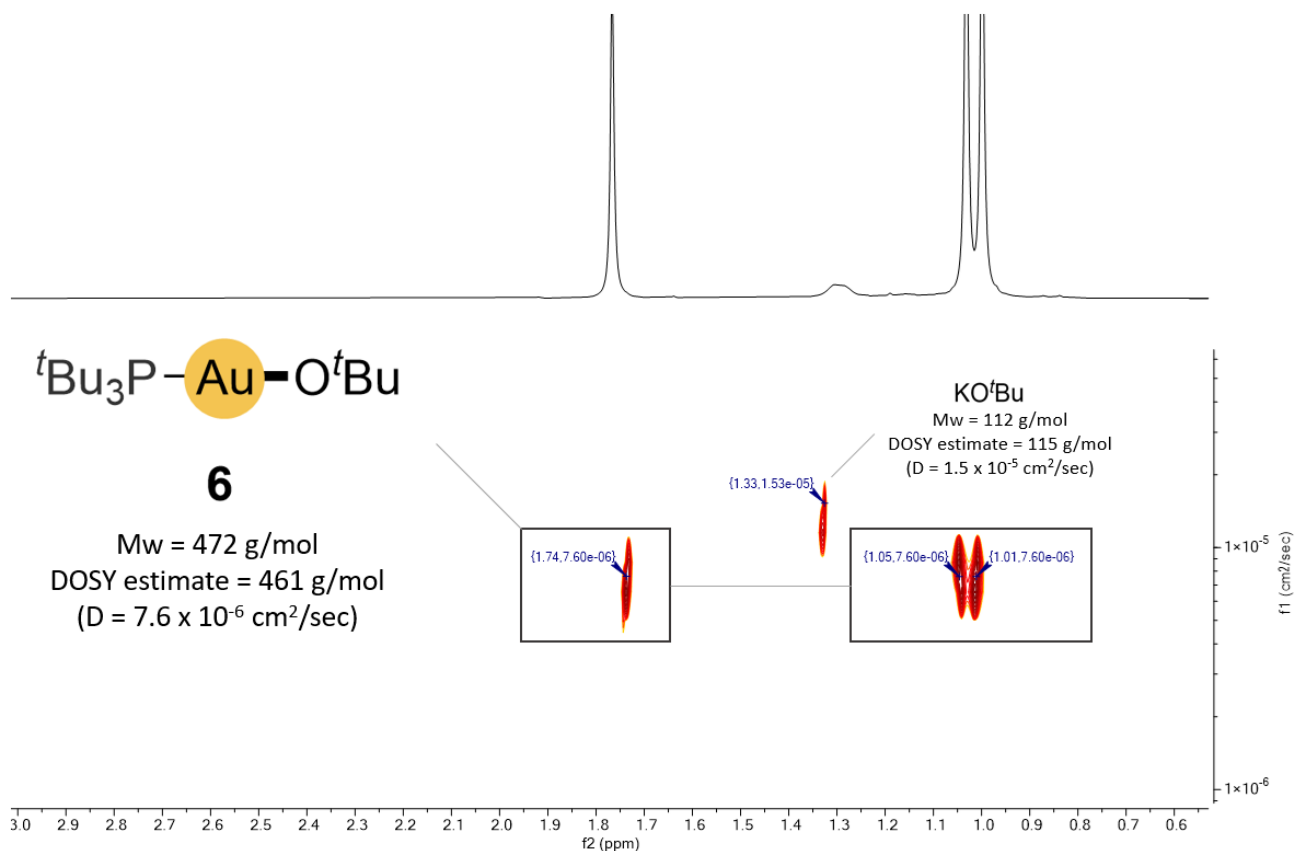

Figure S4: DOSY spectrum ( $\text{C}_6\text{D}_6$ ) of reaction mixture from milling  $(t\text{Bu}_3\text{P})\text{AuCl}$  with  $\text{KO}t\text{Bu}$ .



## Computational details

All calculations were performed using Gaussian09. Geometries were optimized at the DFT level of theory with the hybrid PBE0<sup>17</sup> exchange-correlation functional and the TZVP<sup>18</sup> basis set applied to all non-metal atoms and the SDD<sup>19</sup> basis set applied to Au. Solvent-phase (benzene) enthalpy and free energy values were calculated using the CPCM<sup>20,21</sup> solvation model. Geometry optimizations were performed using an ultrafine integration grid without imposed symmetry or other constraints. Vibrational frequencies were calculated to show that the optimized structures were minima on the potential energy surface.

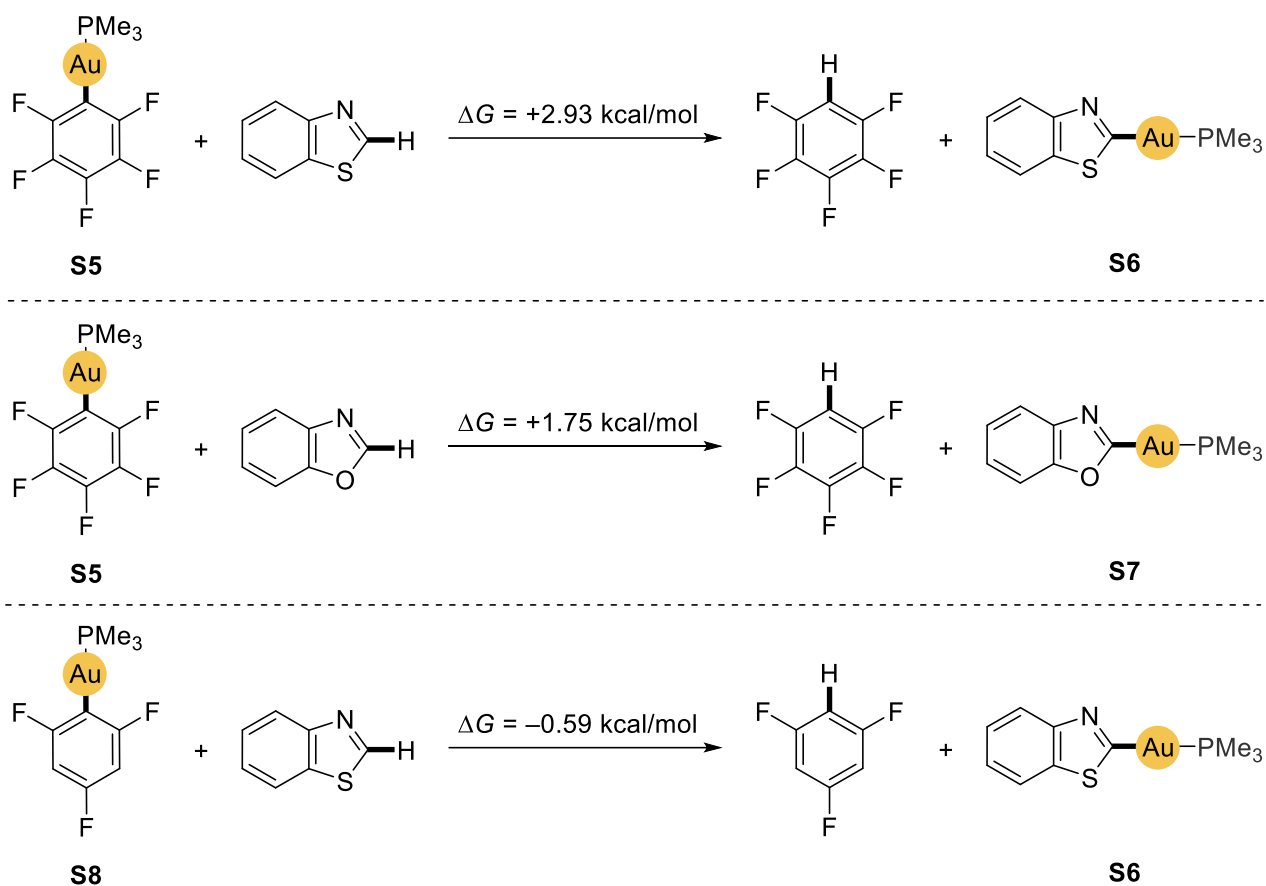

**Scheme S2.** Calculated (DFT) solvent-phase (benzene) free energy ( $\Delta G$ , 298K) values for exchange between haloaryl and heteroaryl groups of  $\text{Me}_3\text{PAu(I)}$  complexes.

Table S1. Total energies of calculated species

| Molecule               | PBE0/TZVP/SDD               |                             |
|------------------------|-----------------------------|-----------------------------|
|                        | $\Delta H_{298K}$ (Hartree) | $\Delta G_{298K}$ (Hartree) |
| pentafluorobenzene     | -727.876320                 | -727.919975                 |
| <b>S5</b>              | -1323.825866                | -1323.894296                |
| benzothiazole          | -722.180483                 | -722.218725                 |
| <b>S6</b>              | -1318.124365                | -1318.188373                |
| benzoxazole            | -399.281864                 | -399.318691                 |
| <b>S7</b>              | -995.227449                 | -995.290226                 |
| 1,3,5-trifluorobenzene | -529.517694                 | -529.556910                 |
| <b>S8</b>              | -1125.461400                | -1125.525603                |

Optimized PBE0/TZVP/SDD Cartesian coordinates (Å)

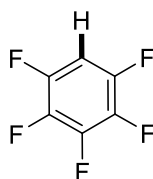

pentafluorobenzene

0 1

|   |          |          |         |
|---|----------|----------|---------|
| C | -1.18766 | -0.96288 | 0.00000 |
| C | -1.20269 | 0.42276  | 0.00000 |
| C | 0.00000  | -1.66708 | 0.00000 |
| C | 0.00000  | 1.11273  | 0.00000 |
| C | 1.20269  | 0.42276  | 0.00000 |
| C | 1.18766  | -0.96288 | 0.00000 |
| F | -2.34866 | -1.61224 | 0.00000 |
| F | -2.34843 | 1.09143  | 0.00000 |
| F | 0.00000  | 2.43683  | 0.00000 |
| F | 2.34843  | 1.09143  | 0.00000 |
| F | 2.34866  | -1.61224 | 0.00000 |
| H | 0.00000  | -2.74931 | 0.00000 |

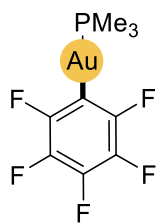

**S5**

**01**

|    |          |          |          |
|----|----------|----------|----------|
| C  | 1.86532  | -1.17050 | 0.00092  |
| C  | 3.25067  | -1.19569 | -0.00058 |
| C  | 1.12683  | -0.00085 | 0.00167  |
| C  | 3.94673  | 0.00129  | -0.00140 |
| C  | 3.24889  | 1.19725  | -0.00059 |
| C  | 1.86363  | 1.16990  | 0.00085  |
| F  | 1.24370  | -2.36319 | 0.00145  |
| F  | 3.92304  | -2.34759 | -0.00137 |
| F  | 5.27692  | 0.00228  | -0.00290 |
| F  | 3.91950  | 2.35018  | -0.00135 |
| F  | 1.24010  | 2.36160  | 0.00140  |
| Au | -0.93561 | -0.00131 | 0.00192  |
| P  | -3.25391 | 0.00055  | -0.00152 |
| C  | -4.00300 | 1.64061  | -0.30910 |
| H  | -3.66982 | 2.01497  | -1.27777 |
| H  | -3.67464 | 2.33901  | 0.46155  |
| H  | -5.09308 | 1.57358  | -0.29963 |
| C  | -4.01520 | -0.55275 | 1.56706  |
| H  | -3.69018 | -1.56998 | 1.78862  |
| H  | -5.10471 | -0.52588 | 1.49522  |
| H  | -3.68792 | 0.09848  | 2.37833  |
| C  | -4.00658 | -1.08188 | -1.26951 |
| H  | -3.68003 | -0.76105 | -2.25939 |
| H  | -5.09647 | -1.03902 | -1.21366 |
| H  | -3.67440 | -2.10878 | -1.11285 |

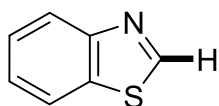

**benzothiazole**

**01**

|   |          |          |         |
|---|----------|----------|---------|
| C | 2.36714  | -0.83833 | 0.00000 |
| C | 2.37636  | 0.56134  | 0.00000 |
| C | 1.19662  | 1.28364  | 0.00000 |
| C | 0.00000  | 0.57532  | 0.00000 |
| C | -0.02405 | -0.83245 | 0.00000 |
| C | 1.17824  | -1.54052 | 0.00000 |
| N | -1.28210 | -1.40205 | 0.00000 |
| C | -2.18730 | -0.49130 | 0.00000 |
| S | -1.63831 | 1.17190  | 0.00000 |
| H | 1.15661  | -2.62395 | 0.00000 |
| H | 3.30818  | -1.37620 | 0.00000 |
| H | 3.32287  | 1.08977  | 0.00000 |
| H | 1.20818  | 2.36711  | 0.00000 |
| H | -3.25028 | -0.69890 | 0.00000 |

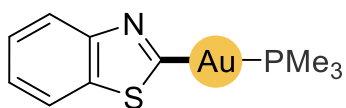

**S6**

**01**

|    |          |          |          |
|----|----------|----------|----------|
| C  | 5.54928  | 1.17464  | 0.00114  |
| C  | 5.82073  | -0.19786 | 0.00101  |
| C  | 4.79261  | -1.12499 | 0.00040  |
| C  | 3.48204  | -0.65788 | -0.00002 |
| C  | 3.19562  | 0.72109  | 0.00010  |
| C  | 4.24771  | 1.63907  | 0.00073  |
| N  | 1.85573  | 1.05358  | -0.00022 |
| C  | 1.07854  | 0.01608  | -0.00068 |
| S  | 1.97792  | -1.53121 | -0.00066 |
| H  | 4.02542  | 2.70010  | 0.00084  |
| H  | 6.37202  | 1.88103  | 0.00161  |
| H  | 6.84917  | -0.54178 | 0.00137  |
| H  | 5.00666  | -2.18763 | 0.00034  |
| Au | -0.96207 | 0.02756  | -0.00077 |
| P  | -3.29087 | 0.07579  | 0.00117  |
| C  | -4.08193 | -1.40177 | -0.73293 |
| C  | -4.04132 | 0.20417  | 1.66502  |
| H  | -5.13138 | 0.22244  | 1.59916  |
| H  | -3.69083 | 1.11649  | 2.14918  |
| H  | -3.72794 | -0.64805 | 2.26928  |
| H  | -5.16999 | -1.31344 | -0.69836 |
| H  | -3.77162 | -2.29048 | -0.18205 |
| H  | -3.75832 | -1.50777 | -1.76905 |
| C  | -4.01364 | 1.47615  | -0.92815 |
| H  | -3.66718 | 2.41544  | -0.49529 |
| H  | -5.10477 | 1.44021  | -0.89609 |
| H  | -3.67907 | 1.43114  | -1.96531 |

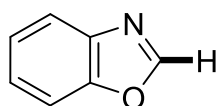

**benzoxazole**

**01**

|   |          |          |         |
|---|----------|----------|---------|
| C | 2.09560  | 0.69244  | 0.00000 |
| C | 2.08102  | -0.70794 | 0.00000 |
| C | 0.89268  | -1.42607 | 0.00000 |
| C | -0.25935 | -0.66703 | 0.00000 |
| C | -0.27283 | 0.72633  | 0.00000 |
| C | 0.92389  | 1.43265  | 0.00000 |
| N | -1.59757 | 1.15525  | 0.00000 |
| C | -2.27349 | 0.06573  | 0.00000 |
| O | -1.55871 | -1.08843 | 0.00000 |
| H | 0.93212  | 2.51590  | 0.00000 |
| H | 3.04978  | 1.20668  | 0.00000 |
| H | 3.02209  | -1.24566 | 0.00000 |
| H | 0.87111  | -2.50861 | 0.00000 |
| H | -3.34761 | -0.04433 | 0.00000 |

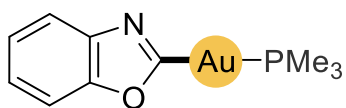

**S7**

**01**

|    |          |          |          |
|----|----------|----------|----------|
| C  | 5.65057  | 0.62302  | -0.00050 |
| C  | 5.59659  | -0.77541 | -0.00012 |
| C  | 4.38419  | -1.45523 | 0.00027  |
| C  | 3.24909  | -0.66866 | 0.00029  |
| C  | 3.27746  | 0.72413  | -0.00001 |
| C  | 4.49622  | 1.39308  | -0.00044 |
| N  | 1.97004  | 1.18962  | 0.00026  |
| C  | 1.21396  | 0.13427  | 0.00050  |
| O  | 1.94663  | -1.05072 | 0.00059  |
| H  | 4.53573  | 2.47620  | -0.00070 |
| H  | 6.61828  | 1.11236  | -0.00084 |
| H  | 6.52122  | -1.34177 | -0.00014 |
| H  | 4.33314  | -2.53741 | 0.00057  |
| Au | -0.82032 | 0.03287  | 0.00001  |
| P  | -3.14590 | -0.03601 | 0.00016  |
| C  | -3.86298 | -1.43259 | -0.93907 |
| C  | -3.89714 | -0.17924 | 1.66228  |
| H  | -4.98696 | -0.20216 | 1.59412  |
| H  | -3.58868 | 0.67080  | 2.27207  |
| H  | -3.54357 | -1.09299 | 2.14140  |
| H  | -4.95415 | -1.40151 | -0.90394 |
| H  | -3.51197 | -2.37364 | -0.51396 |
| H  | -3.53140 | -1.37804 | -1.97667 |
| C  | -3.93934 | 1.44455  | -0.72402 |
| H  | -3.61195 | 1.56091  | -1.75782 |
| H  | -3.63332 | 2.32925  | -0.16442 |
| H  | -5.02722 | 1.35256  | -0.69441 |

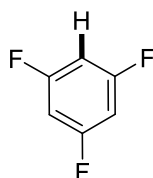

**1,3,5-fluorobenzene**

**01**

|   |          |          |         |
|---|----------|----------|---------|
| C | -0.16107 | 1.35034  | 0.00000 |
| C | -1.29029 | 0.55293  | 0.00000 |
| C | 1.12404  | 0.84097  | 0.00000 |
| C | -1.08892 | -0.81470 | 0.00000 |
| C | 0.16629  | -1.39390 | 0.00000 |
| C | 1.25001  | -0.53566 | 0.00000 |
| F | -0.31943 | 2.67813  | 0.00000 |
| H | -2.28447 | 0.97899  | 0.00000 |
| F | -2.15969 | -1.61566 | 0.00000 |
| H | 0.29454  | -2.46789 | 0.00000 |
| F | 2.47906  | -1.06246 | 0.00000 |
| H | 1.99007  | 1.48897  | 0.00000 |

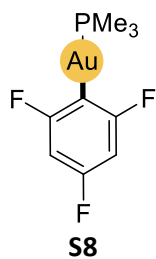

**01**

|    |          |          |          |
|----|----------|----------|----------|
| C  | 2.22118  | -1.15891 | 0.00034  |
| C  | 3.60562  | -1.20888 | -0.00076 |
| C  | 1.45993  | -0.00060 | 0.00096  |
| C  | 4.26955  | 0.00122  | -0.00137 |
| C  | 3.60409  | 1.21051  | -0.00073 |
| C  | 2.21974  | 1.15870  | 0.00029  |
| F  | 1.58298  | -2.35069 | 0.00087  |
| H  | 4.14129  | -2.14911 | -0.00131 |
| F  | 5.61353  | 0.00208  | -0.00251 |
| H  | 4.13853  | 2.15136  | -0.00112 |
| F  | 1.57992  | 2.34963  | 0.00075  |
| Au | -0.59764 | -0.00103 | 0.00149  |
| P  | -2.91731 | 0.00047  | -0.00103 |
| C  | -3.67219 | 1.63902  | -0.30741 |
| H  | -3.34051 | 2.01463  | -1.27613 |
| H  | -3.34425 | 2.33795  | 0.46297  |
| H  | -4.76221 | 1.57020  | -0.29697 |
| C  | -3.68278 | -0.55298 | 1.56648  |
| H  | -3.35786 | -1.57018 | 1.78851  |
| H  | -4.77230 | -0.52626 | 1.49388  |
| H  | -3.35601 | 0.09779  | 2.37837  |
| C  | -3.67551 | -1.08071 | -1.26802 |
| H  | -3.34965 | -0.76019 | -2.25827 |
| H  | -4.76535 | -1.03703 | -1.21092 |
| H  | -3.34387 | -2.10799 | -1.11244 |

## Crystallographic data

**Table 1. Crystal data and structure refinement for 3d.**

|                                             |                                                           |
|---------------------------------------------|-----------------------------------------------------------|
| CCDC No.                                    | 2007939                                                   |
| Empirical formula                           | C <sub>18</sub> H <sub>30</sub> AuCl <sub>2</sub> P       |
| Formula weight                              | 545.25                                                    |
| Temperature/K                               | 170                                                       |
| Crystal system                              | triclinic                                                 |
| Space group                                 | P-1                                                       |
| a/Å                                         | 8.63460(10)                                               |
| b/Å                                         | 11.49630(10)                                              |
| c/Å                                         | 11.8740(2)                                                |
| α/°                                         | 65.9950(10)                                               |
| β/°                                         | 87.9480(10)                                               |
| γ/°                                         | 71.8100(10)                                               |
| Volume/Å <sup>3</sup>                       | 1017.27(2)                                                |
| Z                                           | 2                                                         |
| ρ <sub>calc</sub> /g/cm <sup>3</sup>        | 1.780                                                     |
| μ/mm <sup>-1</sup>                          | 7.568                                                     |
| F(000)                                      | 532.0                                                     |
| Crystal size/mm <sup>3</sup>                | 0.1 × 0.06 × 0.03                                         |
| Radiation                                   | MoKα (λ = 0.71073)                                        |
| 2Θ range for data collection/°              | 4.102 to 69.31                                            |
| Index ranges                                | -13 ≤ h ≤ 13, -18 ≤ k ≤ 18, -18 ≤ l ≤ 18                  |
| Reflections collected                       | 14472                                                     |
| Independent reflections                     | 14472 [R <sub>int</sub> = ?, R <sub>sigma</sub> = 0.0100] |
| Data/restraints/parameters                  | 14472/0/209                                               |
| Goodness-of-fit on F <sup>2</sup>           | 1.127                                                     |
| Final R indexes [I>=2σ (I)]                 | R <sub>1</sub> = 0.0538, wR <sub>2</sub> = 0.1384         |
| Final R indexes [all data]                  | R <sub>1</sub> = 0.0552, wR <sub>2</sub> = 0.1395         |
| Largest diff. peak/hole / e Å <sup>-3</sup> | 2.54/-2.47                                                |

NOTE: The data collected for this crystal were integrated as a twin (0 0 1 reciprocal lattice) with two components 0.7458(7) : 0.2542(7) using CrysAlisPro 1.171.39.46 (Rigaku OD, 2018).

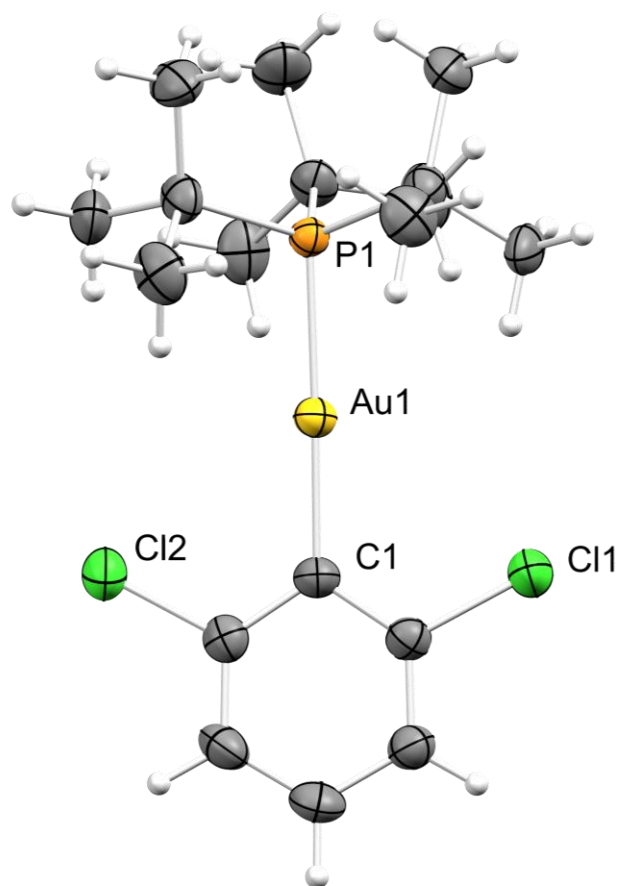

ORTEP plot (50% probability ellipsoids) of **3d**. Selected bond lengths [Å] and angles [°]: Au1-P1 2.2948(15), Au1-C1 2.039(6), C1-Au1-P1 178.73(19).



**Table 2. Crystal data and structure refinement for 3f.**

|                                             |                                                               |
|---------------------------------------------|---------------------------------------------------------------|
| CCDC No.                                    | 2007940                                                       |
| Empirical formula                           | C <sub>17</sub> H <sub>29</sub> AuClFNP                       |
| Formula weight                              | 529.80                                                        |
| Temperature/K                               | 170                                                           |
| Crystal system                              | monoclinic                                                    |
| Space group                                 | P2 <sub>1</sub> /n                                            |
| a/Å                                         | 8.6986(10)                                                    |
| b/Å                                         | 18.586(2)                                                     |
| c/Å                                         | 12.1084(13)                                                   |
| α/°                                         | 90                                                            |
| β/°                                         | 90.975(2)                                                     |
| γ/°                                         | 90                                                            |
| Volume/Å <sup>3</sup>                       | 1957.3(4)                                                     |
| Z                                           | 4                                                             |
| ρ <sub>calc</sub> /g/cm <sup>3</sup>        | 1.798                                                         |
| μ/mm <sup>-1</sup>                          | 7.740                                                         |
| F(000)                                      | 1032.0                                                        |
| Crystal size/mm <sup>3</sup>                | 0.12 × 0.1 × 0.1                                              |
| Radiation                                   | MoKα (λ = 0.71073)                                            |
| 2Θ range for data collection/°              | 4.016 to 61.41                                                |
| Index ranges                                | -12 ≤ h ≤ 11, -26 ≤ k ≤ 26, -17 ≤ l ≤ 17                      |
| Reflections collected                       | 28991                                                         |
| Independent reflections                     | 6049 [R <sub>int</sub> = 0.0621, R <sub>sigma</sub> = 0.0583] |
| Data/restraints/parameters                  | 6049/3/208                                                    |
| Goodness-of-fit on F <sup>2</sup>           | 1.067                                                         |
| Final R indexes [I>=2σ (I)]                 | R <sub>1</sub> = 0.0322, wR <sub>2</sub> = 0.0719             |
| Final R indexes [all data]                  | R <sub>1</sub> = 0.0441, wR <sub>2</sub> = 0.0745             |
| Largest diff. peak/hole / e Å <sup>-3</sup> | 1.60/-1.60                                                    |

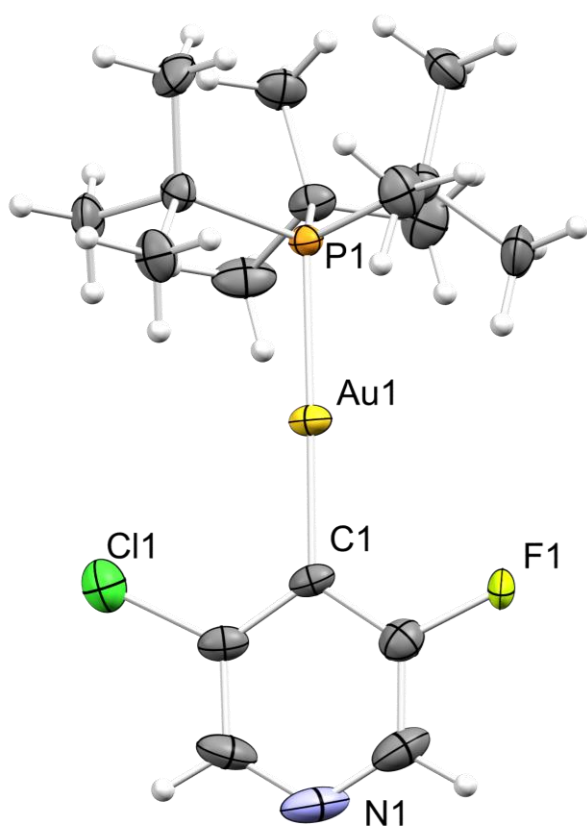

ORTEP plot (50% probability ellipsoids) of **3f**. Selected bond lengths [Å] and angles [°]: Au1-P1 2.3007(10), Au1-C1 2.045(4), C1-Au1-P1 178.49(12).



## References

- 1 F. J. L. L. Ingner, A. C. Schmitt, A. Orthaber, P. J. Gates and L. T. Pilarski, *ChemSusChem*, 2020, **13**, 2032–2037.
- 2 Bruker, *SAINT*, Bruker AXS Inc., Madison, Wisconsin, USA, 2007.
- 3 Bruker, *SADABS*, Bruker AXS Inc., Madison, Wisconsin, USA, 2001.
- 4 G. M. Sheldrick and IUCr, *Acta Crystallogr. Sect. A Found. Crystallogr.*, 2008, **64**, 112–122.
- 5 O. V. Dolomanov, L. J. Bourhis, R. J. Gildea, J. A. K. Howard and H. Puschmann, *J. Appl. Crystallogr.*, 2009, **42**, 339–341.
- 6 N. A. Barnes, K. R. Flower, S. A. Fyyaz, S. M. Godfrey, A. T. McGown, P. J. Miles, R. G. Pritchard and J. E. Warren, *CrystEngComm*, 2010, **12**, 784–794.
- 7 D. V. Partyka, M. Zeller, A. D. Hunter and T. G. Gray, *Angew. Chemie - Int. Ed.*, 2006, **45**, 8188–8191.
- 8 C. Croix, A. Balland-Longeau, H. Allouchi, M. Giorgi, A. Duchêne and J. Thibonnet, *J. Organomet. Chem.*, 2005, **690**, 4835–4843.
- 9 M. Peña-López, L. A. Sarandeses and J. Pérez Sestelo, *European J. Org. Chem.*, 2013, **2013**, 2545–2554.
- 10 C. Croix, C.-E. Sauvage, A. Balland-Longeau, A. Duchêne and J. Thibonnet, *J. Inorg. Organomet. Polym. Mater.*, 2008, **18**, 334–343.
- 11 M. Peña-López, M. Ayán-Varela, L. A. Sarandeses and J. P. Sestelo, *Org. Biomol. Chem.*, 2012, **10**, 1686–1694.
- 12 N. Ahlsten, G. J. P. P. Perry, X. C. Cambeiro, T. C. Boorman and I. Larrosa, *Catal. Sci. Technol.*, 2013, **3**, 2892.
- 13 P. Lu, T. C. Boorman, A. M. Z. Slawin and I. Larrosa, *J. Am. Chem. Soc.*, 2010, **132**, 5580–5581.
- 14 S. S. S. Dupuy, L. Crawford, M. Bühl, A. M. Z. Slawin and S. P. Nolan, *Adv. Synth. Catal.*, 2012, **354**, 2380–2386.
- 15 D. Partyka, A. Esswein, M. Zeller, A. Hunter, T. Gray, D. Partyka, A. Esswein, M. Zeller, A. Hunter and T. Gray, *Organometallics*, 2007, **26**, 3279–3282.
- 16 G. A. Artamkina, P. K. Sazonov, V. A. Ivushkin and I. P. Beletskaya, *Chem. – A Eur. J.*, 1998, **4**, 1169–1178.
- 17 C. Adamo and V. Barone, *J. Chem. Phys.*, 1999, **110**, 6158–6170.
- 18 N. Godbout, D. R. Salahub, J. Andzelm and E. Wimmer, *Can. J. Chem.*, 1992, **70**, 560–571.
- 19 M. Dolg, U. Wedig, H. Stoll and H. Preuss, *J. Chem. Phys.*, 1987, **86**, 866–872.
- 20 E. Cancès, B. Mennucci and J. Tomasi, *J. Chem. Phys.*, 1997, **107**, 3032–3041.
- 21 V. Barone, M. Cossi and J. Tomasi, *J. Chem. Phys.*, 1997, **107**, 3210–3221.

# NMR Spectra

**Transmetalation from boronic acids  
(Scheme 1)**

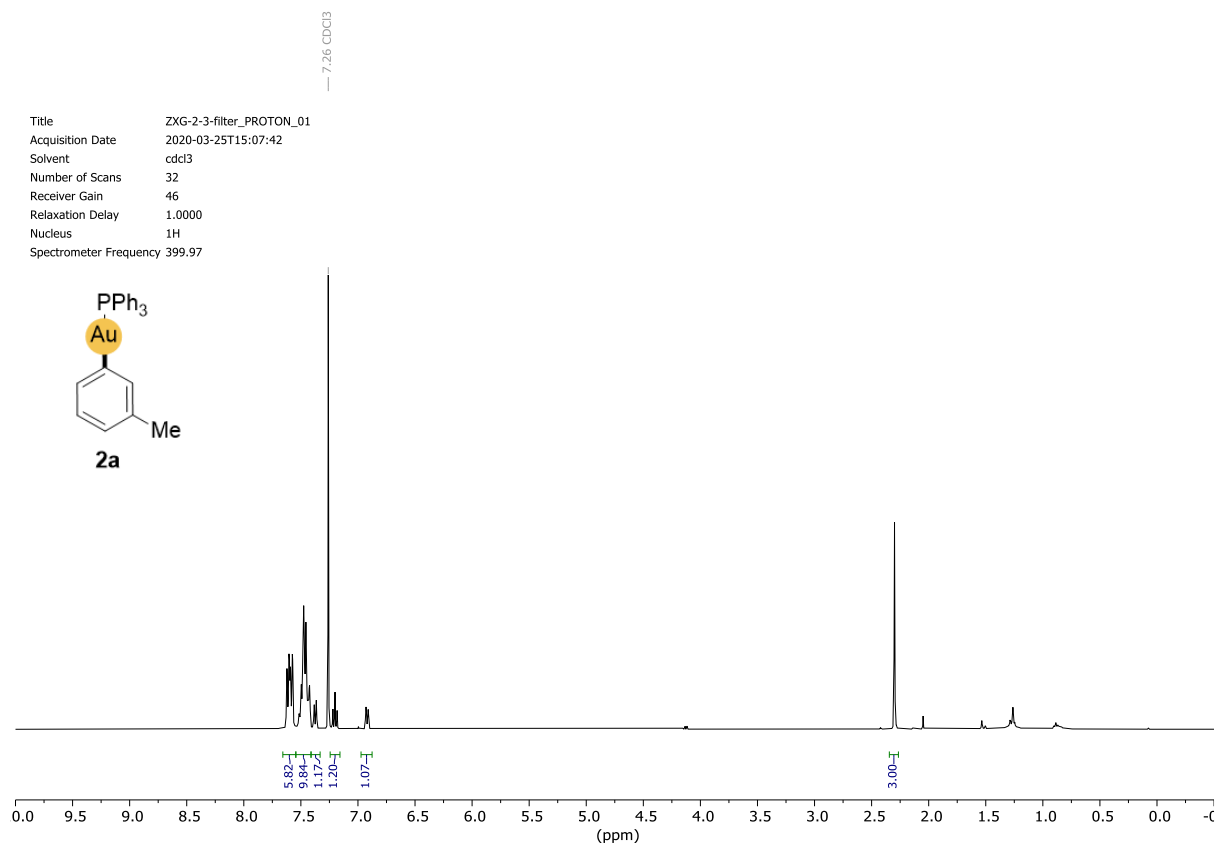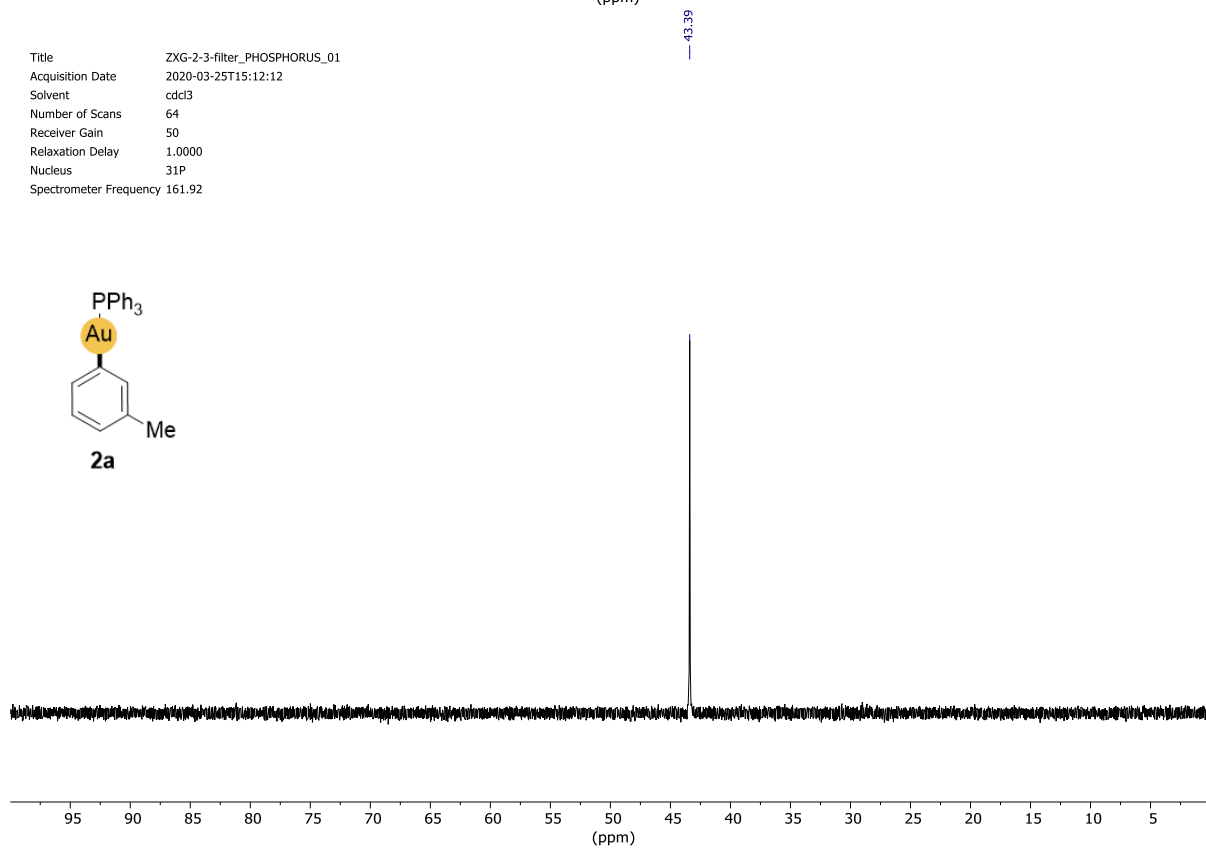

Title ZXG-7-9-filter\_PROTON\_01  
 Acquisition Date 2020-03-27T16:54:10  
 Solvent cdd3  
 Number of Scans 32  
 Receiver Gain 46  
 Relaxation Delay 1.0000  
 Nucleus  $^1\text{H}$   
 Spectrometer Frequency 399.97

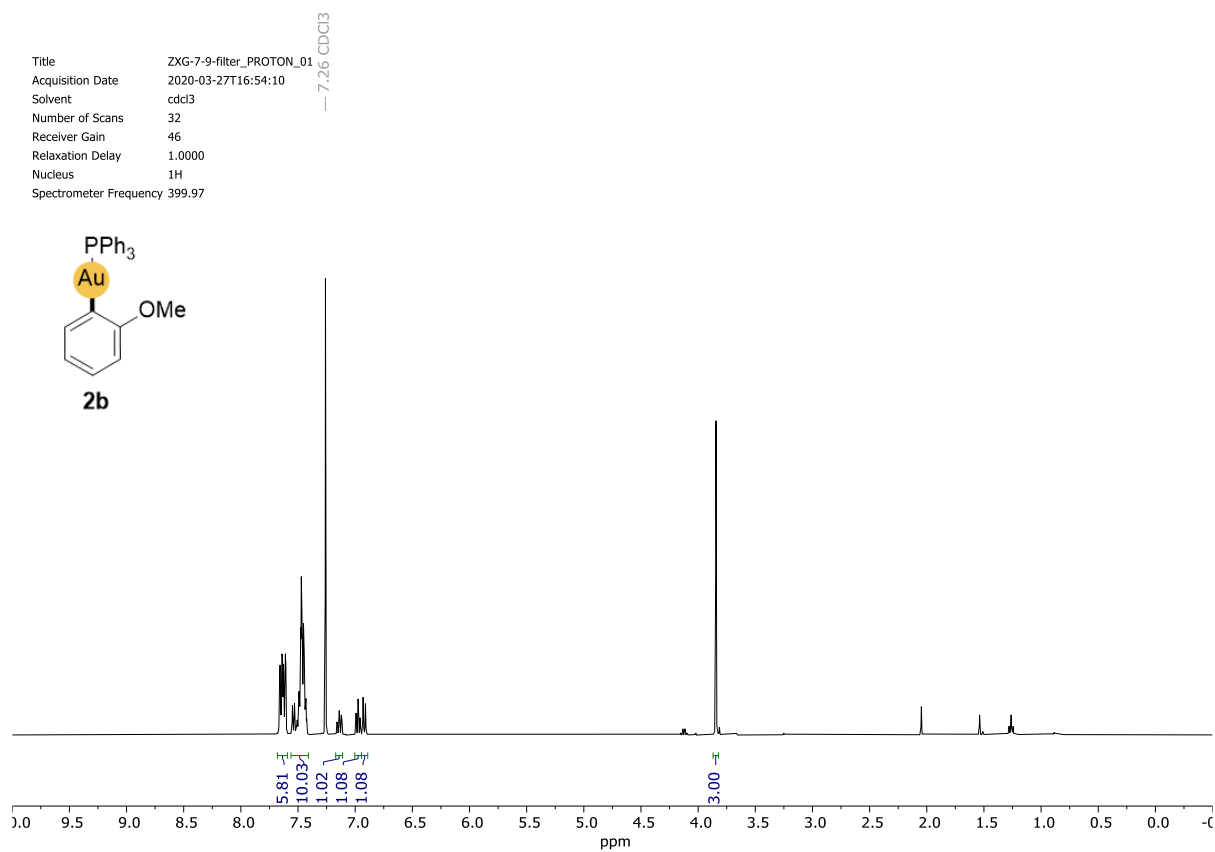

Title ZXG-7-9-filter\_PHOSPHORUS\_01  
 Acquisition Date 2020-03-27T16:58:17  
 Solvent cdd3  
 Number of Scans 64  
 Receiver Gain 50  
 Relaxation Delay 1.0000  
 Nucleus  $^{31}\text{P}$   
 Spectrometer Frequency 161.92

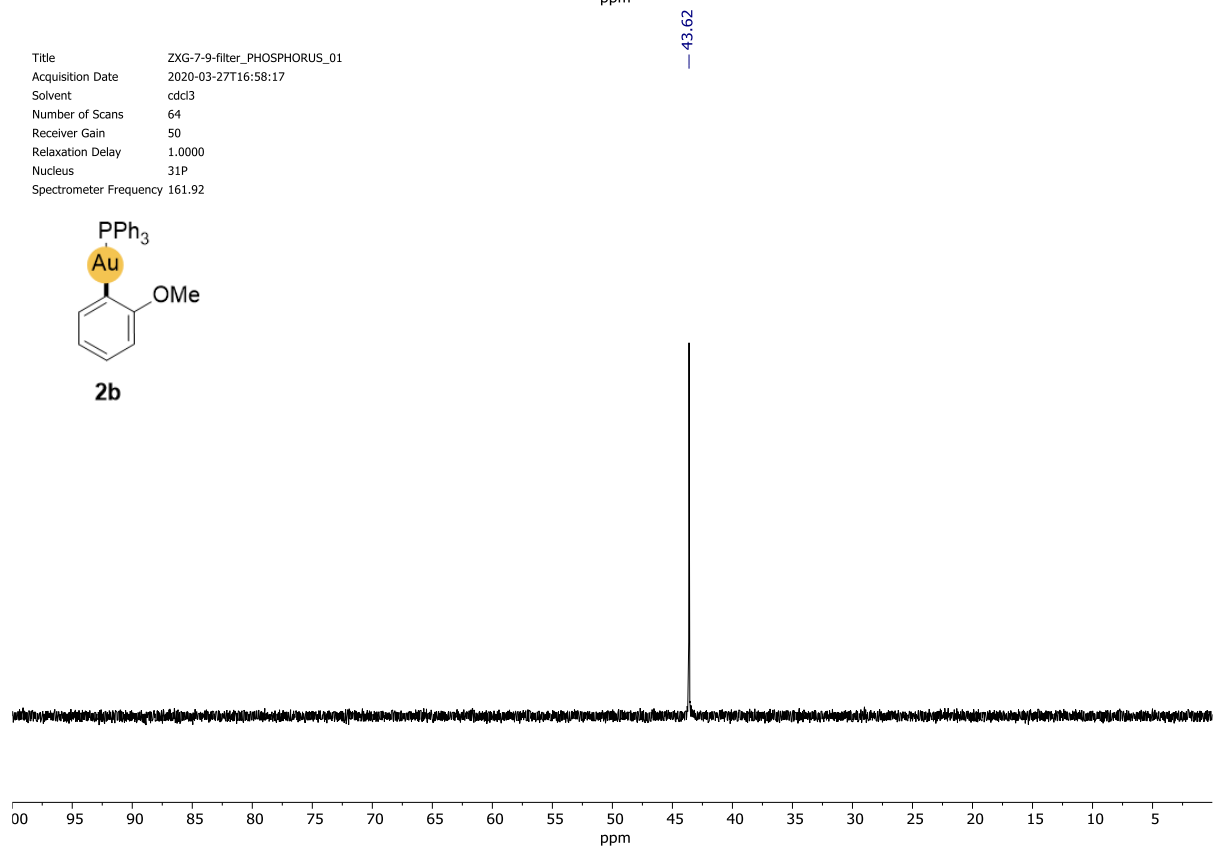

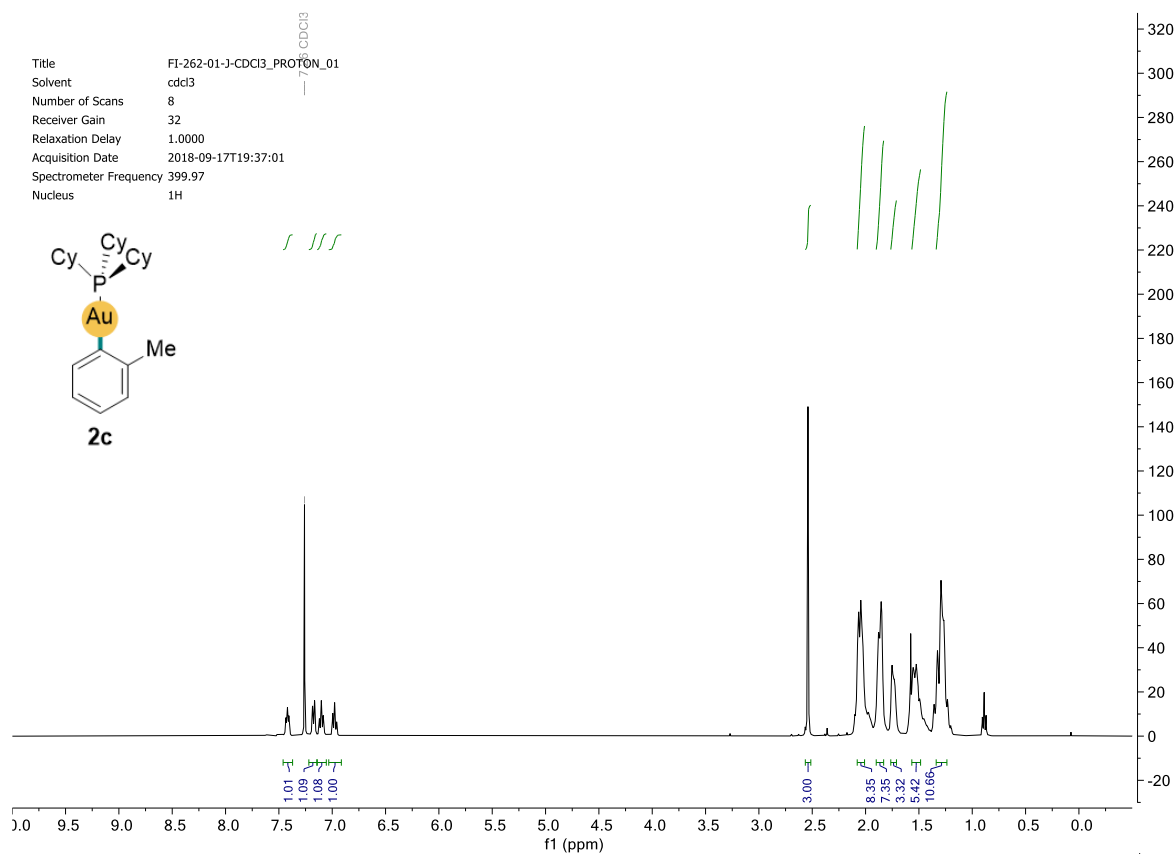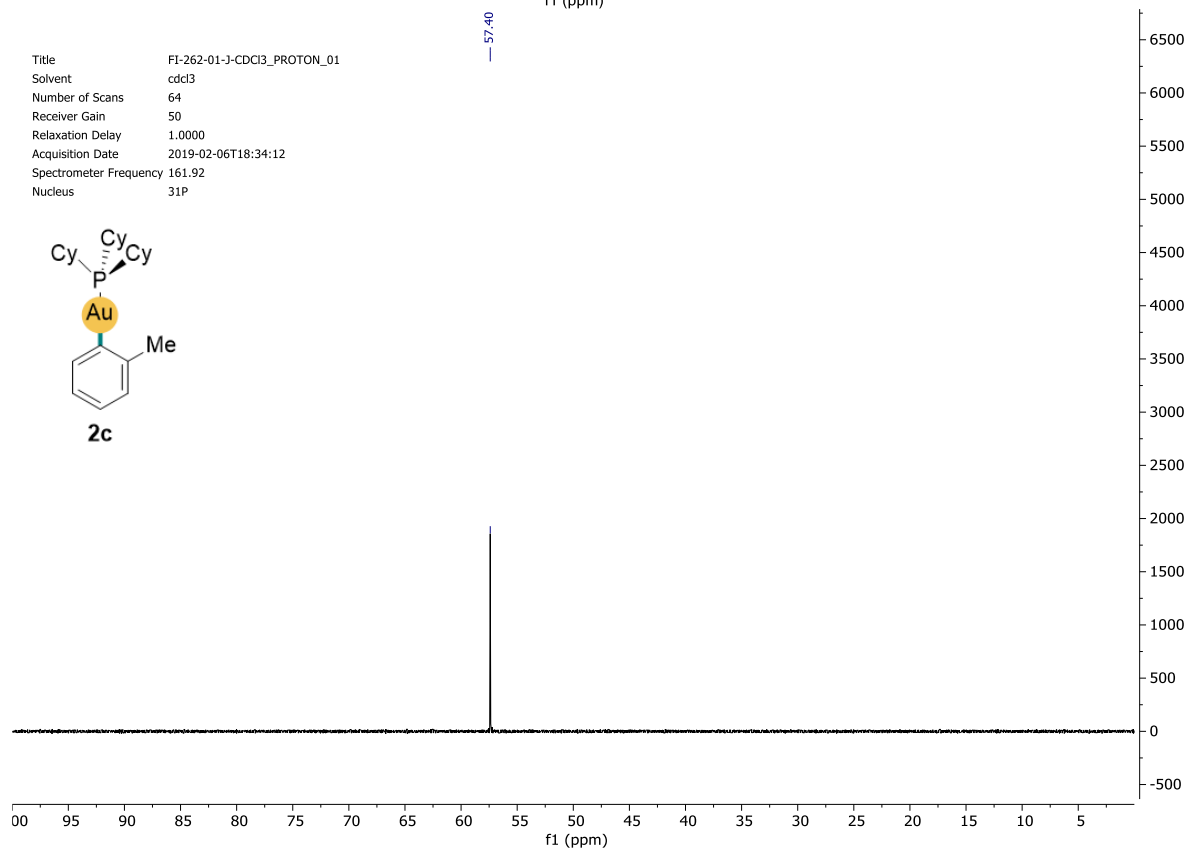



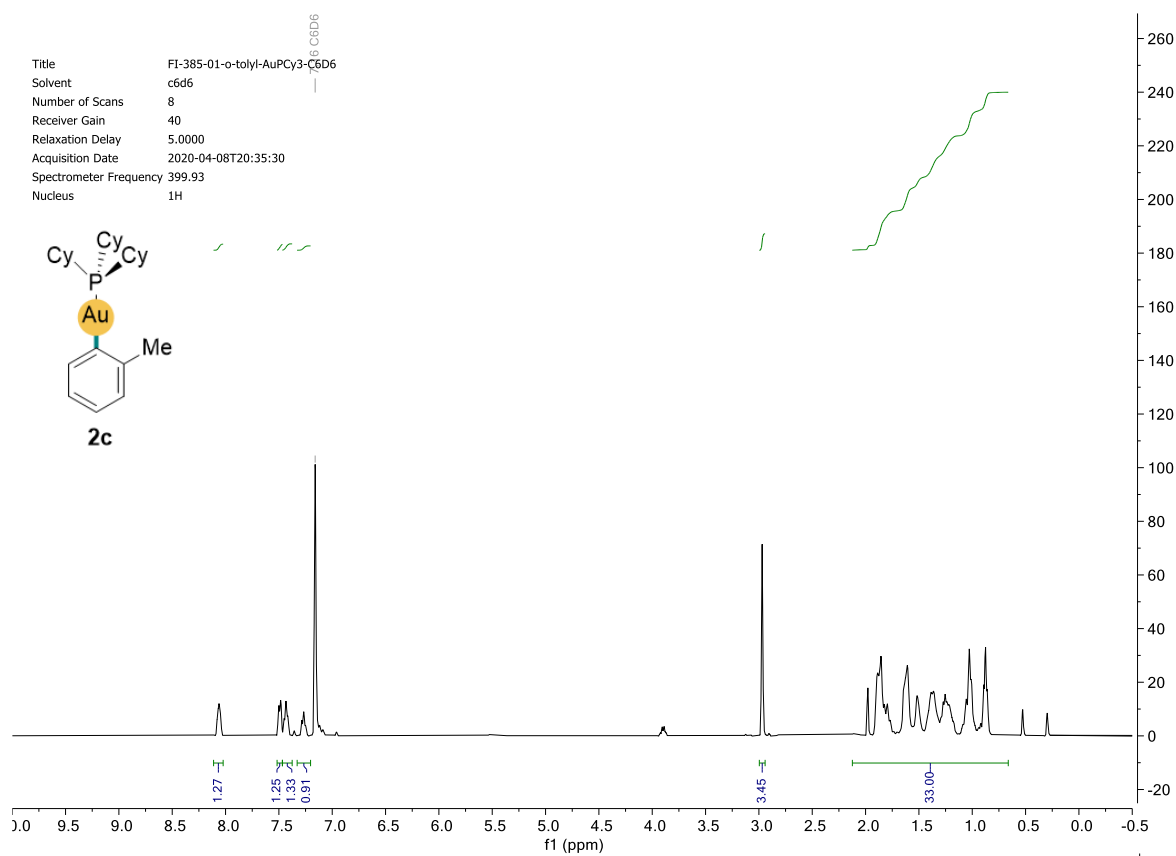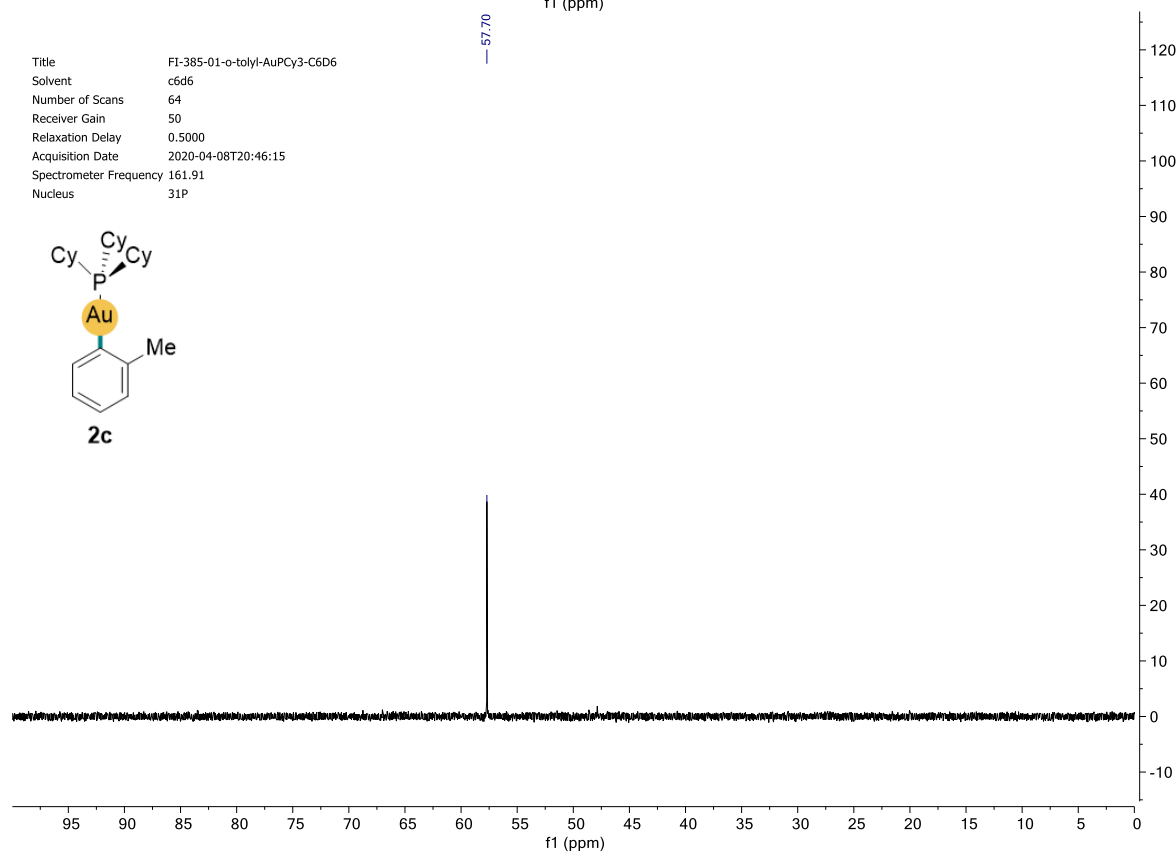

Title ZXG-21-3-filter\_PROTON\_01  
 Acquisition Date 2020-03-30T10:32:31  
 Solvent cdd3  
 Number of Scans 32  
 Receiver Gain 42  
 Relaxation Delay 1.0000  
 Nucleus  $^1\text{H}$   
 Spectrometer Frequency 399.97

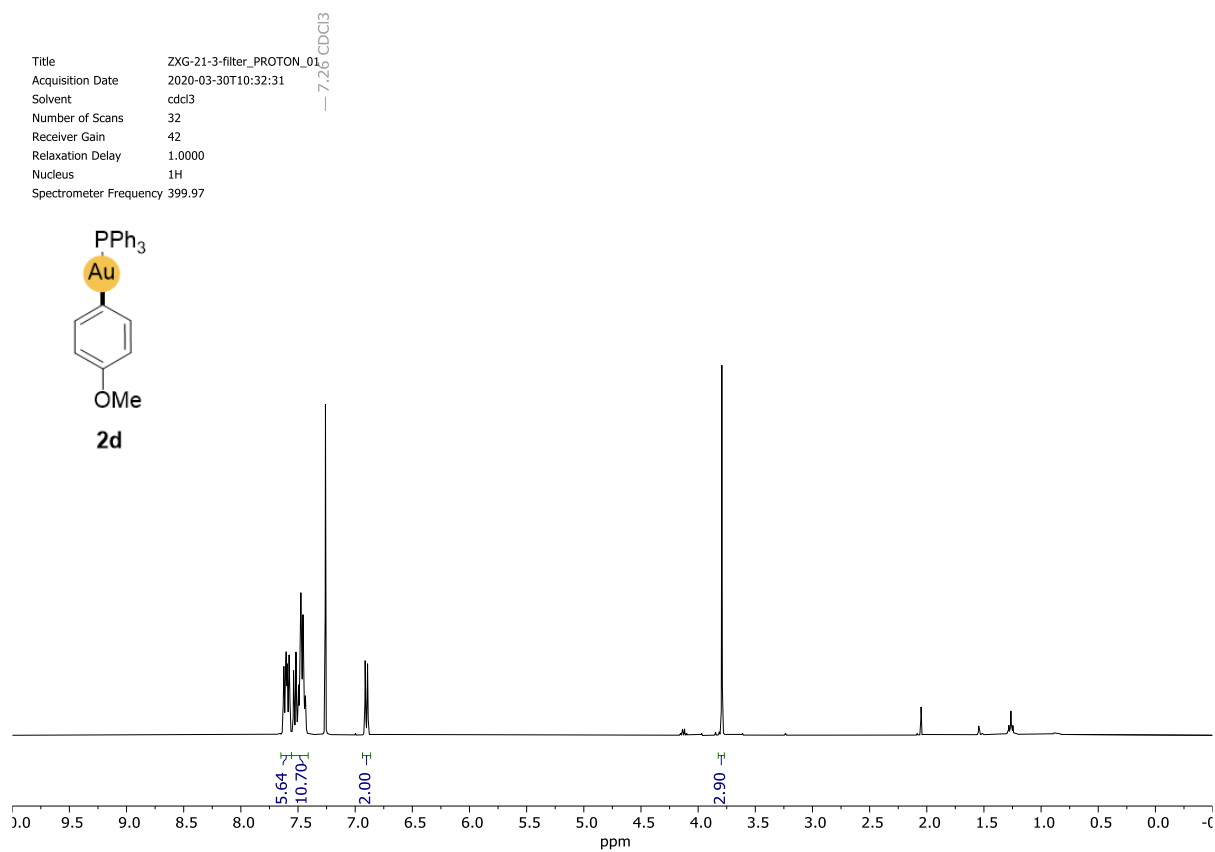

Title ZXG-21-3-filter\_PHOSPHORUS\_01  
 Acquisition Date 2020-03-30T10:37:00  
 Solvent cdd3  
 Number of Scans 64  
 Receiver Gain 50  
 Relaxation Delay 1.0000  
 Nucleus  $^{31}\text{P}$   
 Spectrometer Frequency 161.92

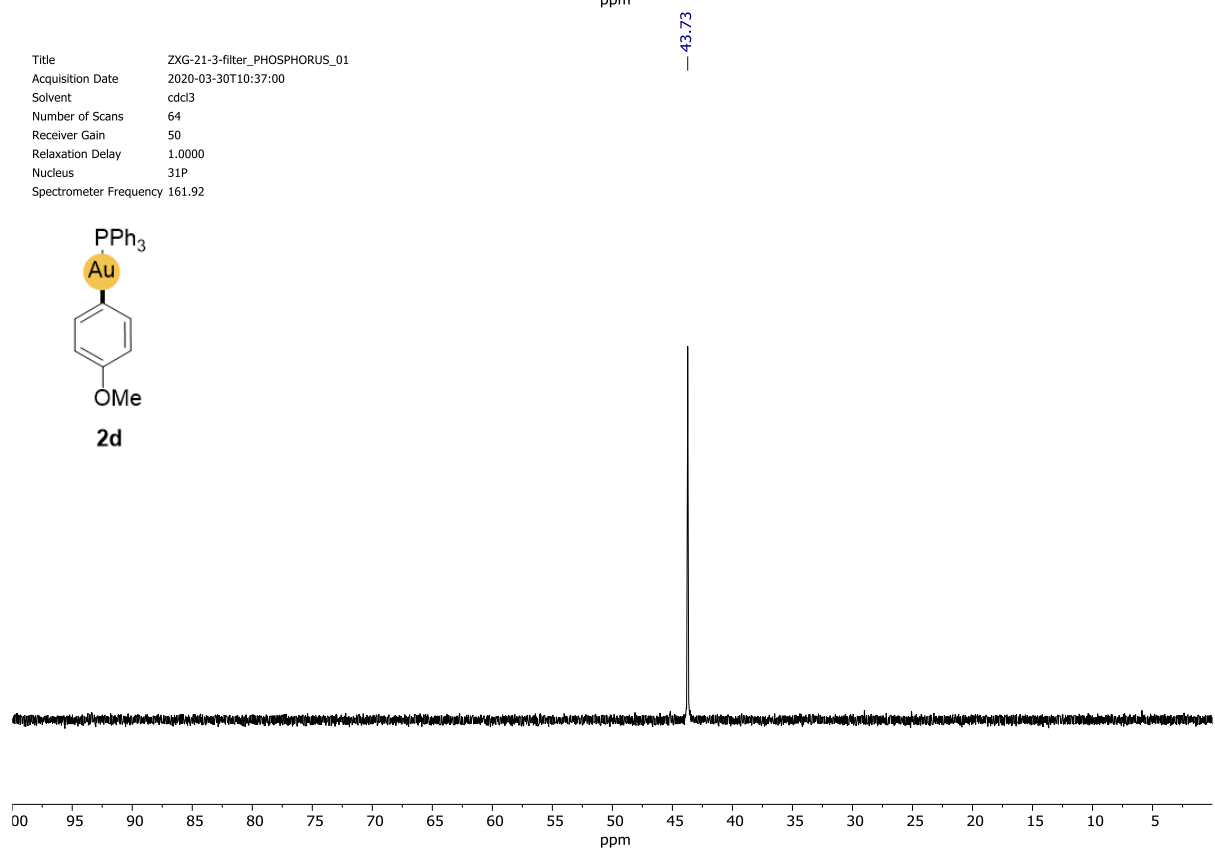

Title ZXG-17-5-filter-SI\_PROTON\_01  
 Acquisition Date 2020-04-10T04:49:54  
 Solvent c6d6  
 Number of Scans 32  
 Receiver Gain 42  
 Relaxation Delay 1.0000  
 Nucleus  $^1\text{H}$   
 Spectrometer Frequency 399.97

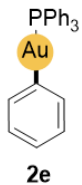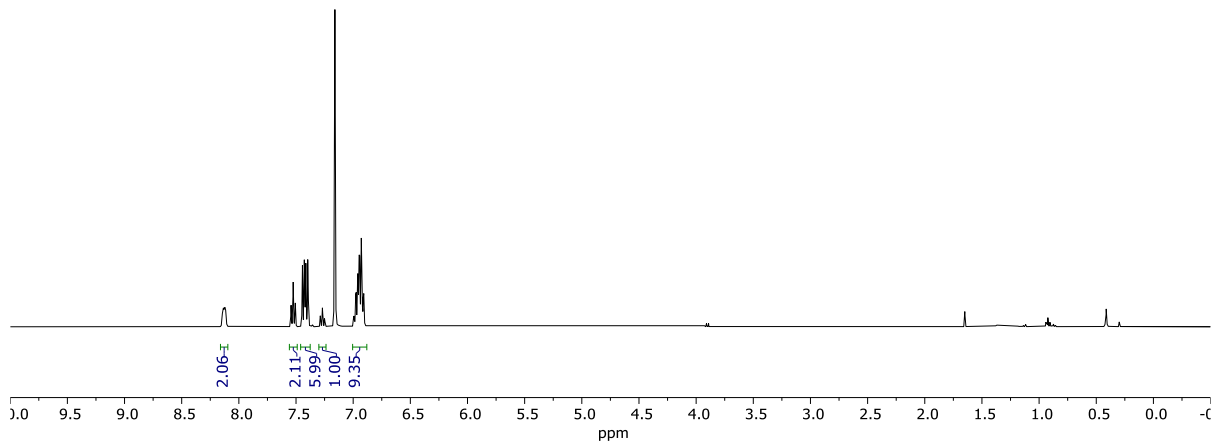

Title ZXG-17-5-filter-SI\_PHOSPHORUS\_01  
 Acquisition Date 2020-04-10T04:54:21  
 Solvent c6d6  
 Number of Scans 64  
 Receiver Gain 50  
 Relaxation Delay 1.0000  
 Nucleus  $^{31}\text{P}$   
 Spectrometer Frequency 161.92

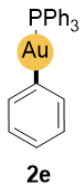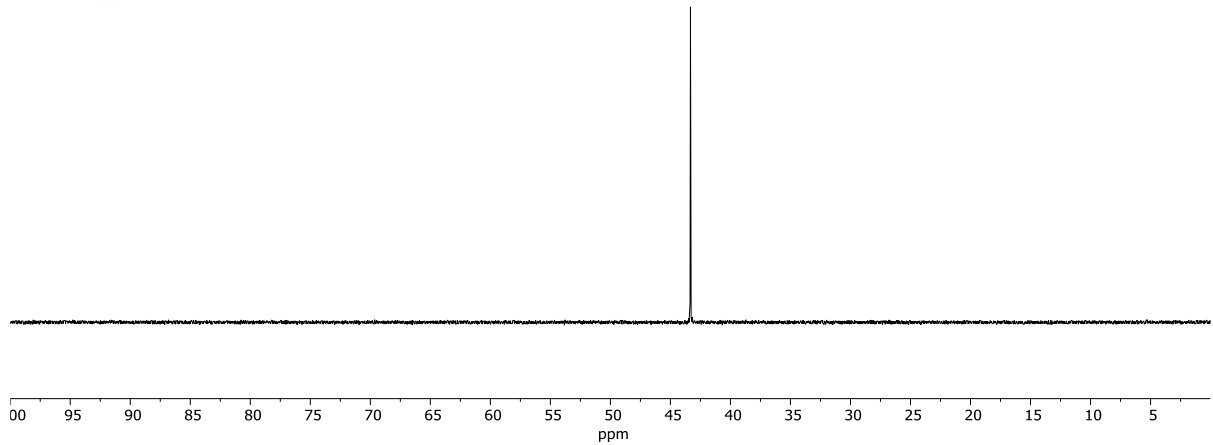

Title ZXG-17-5-filter\_PROTON\_0  
 Acquisition Date 2020-04-09T09:11:13  
 Solvent cdd3  
 Number of Scans 32  
 Receiver Gain 46  
 Relaxation Delay 1.0000  
 Nucleus 1H  
 Spectrometer Frequency 399.97

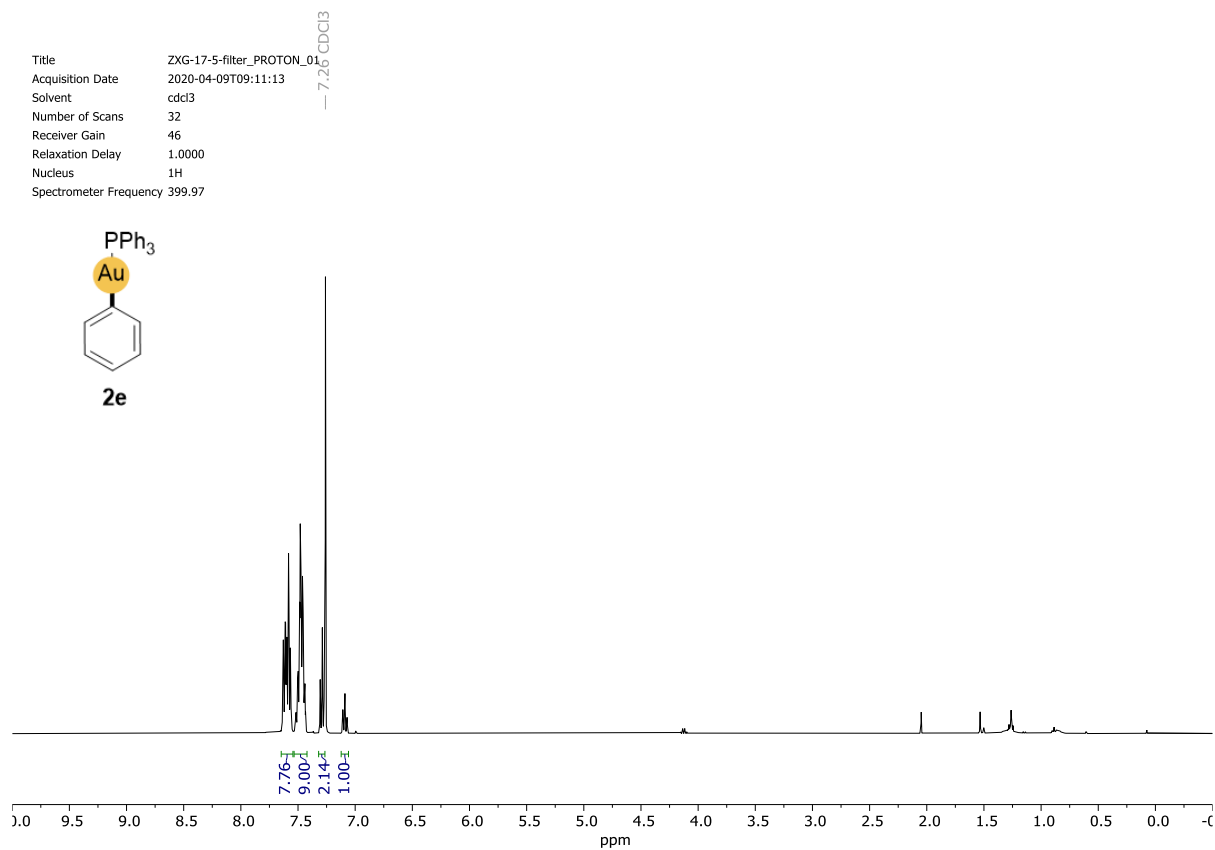

Title ZXG-17-5-filter\_PHOSPHORUS\_01  
 Acquisition Date 2020-04-09T09:15:49  
 Solvent cdd3  
 Number of Scans 64  
 Receiver Gain 50  
 Relaxation Delay 1.0000  
 Nucleus 31P  
 Spectrometer Frequency 161.92

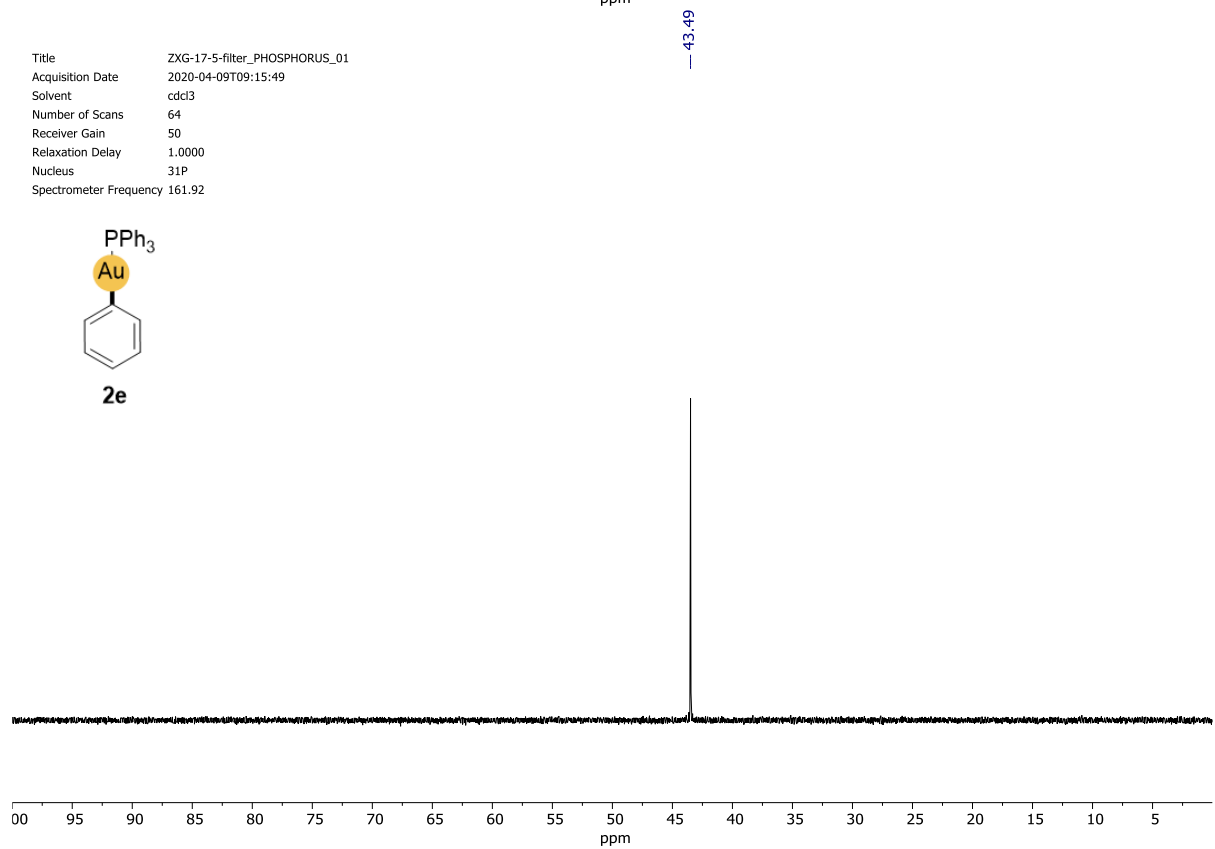

Title ZXG-25-1-filter3\_PROTON\_01  
 Acquisition Date 2020-04-06T10:39:17  
 Solvent cdd3  
 Number of Scans 32  
 Receiver Gain 44  
 Relaxation Delay 1.0000  
 Nucleus 1H  
 Spectrometer Frequency 399.97

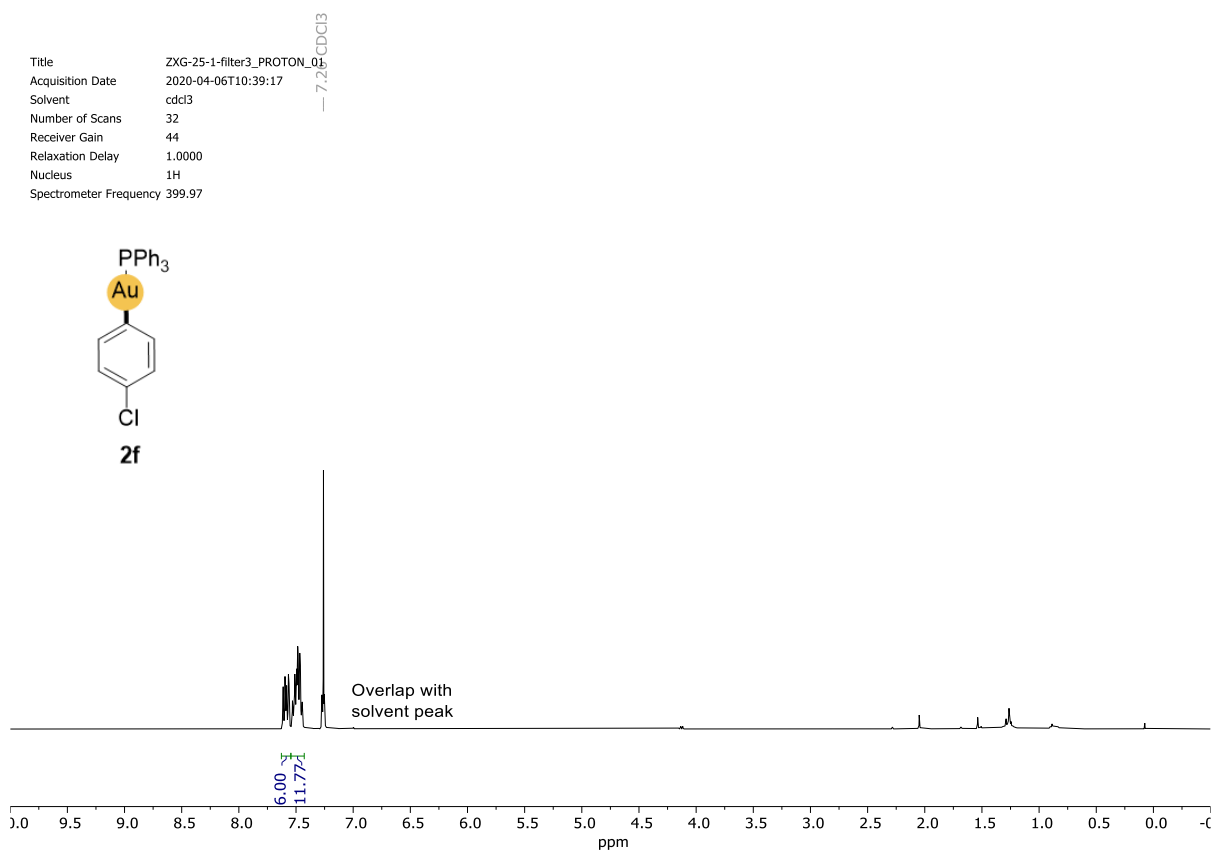

Title ZXG-25-1-filter3\_PHOSPHORUS\_01  
 Acquisition Date 2020-04-06T10:43:51  
 Solvent cdd3  
 Number of Scans 64  
 Receiver Gain 50  
 Relaxation Delay 1.0000  
 Nucleus 31P  
 Spectrometer Frequency 161.92

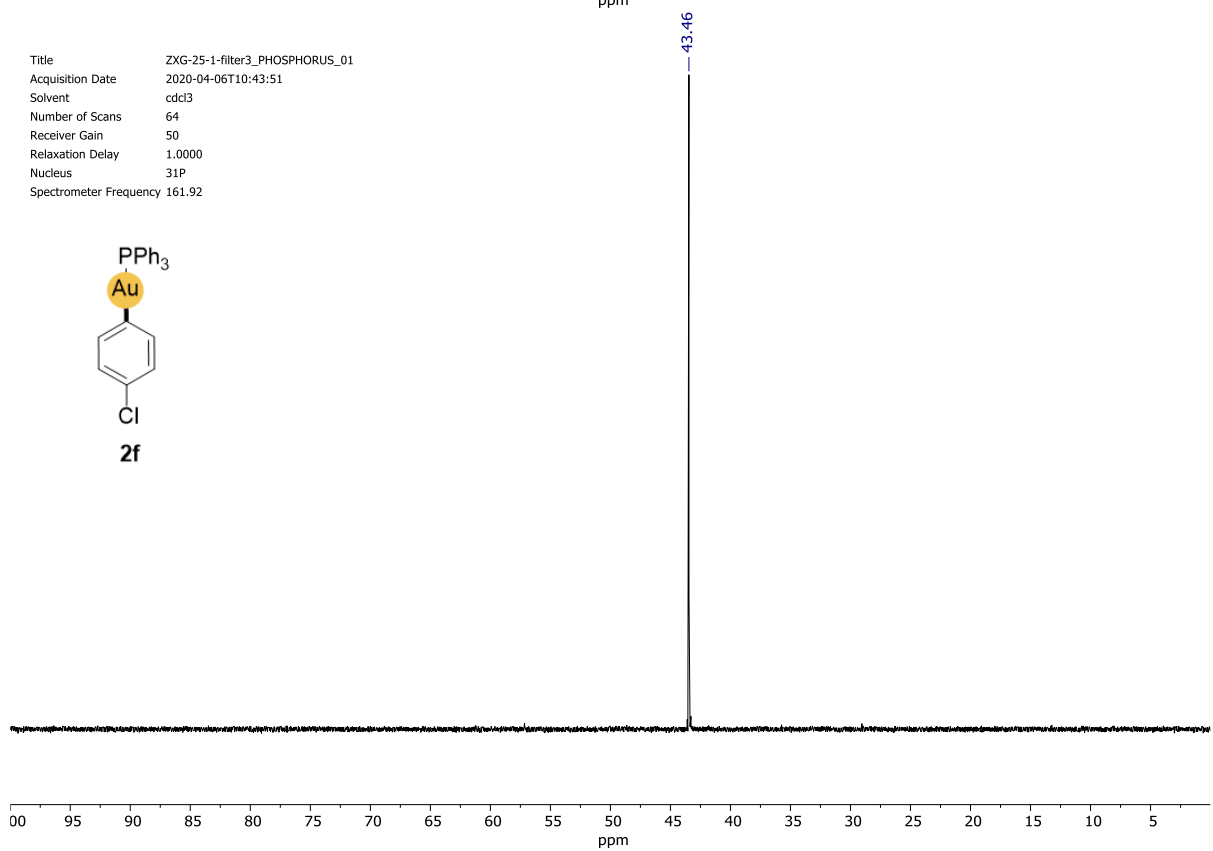

Title ZXG-24-6-pentane-wash\_PROTON\_01  
Acquisition Date 2020-04-17T17:56:16  
Solvent ccd3  
Number of Scans 32  
Receiver Gain 48  
Relaxation Delay 1.0000  
Nucleus 1H  
Spectrometer Frequency 399.97

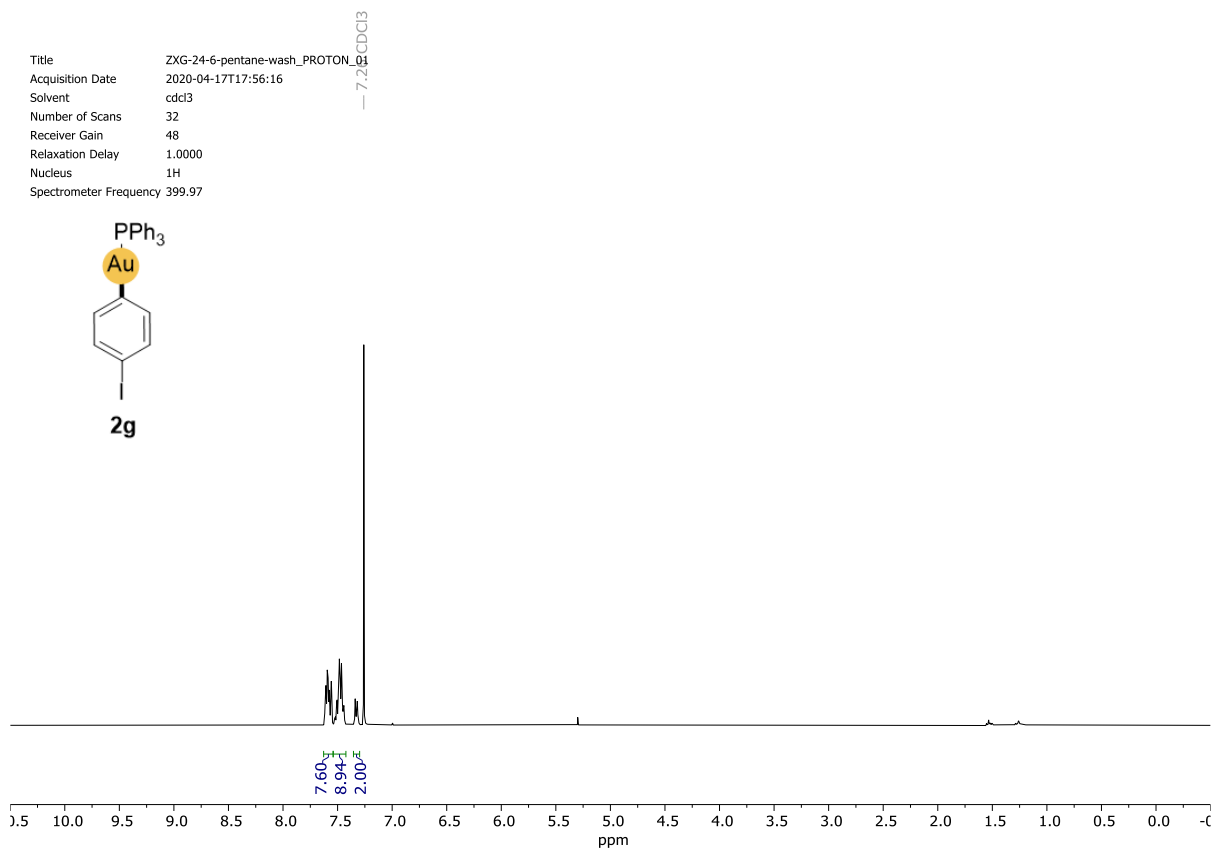

Title ZXG-24-6-pentane-wash\_PHOSPHORUS\_01  
Acquisition Date 2020-04-17T18:00:26  
Solvent ccd3  
Number of Scans 64  
Receiver Gain 50  
Relaxation Delay 1.0000  
Nucleus 31P  
Spectrometer Frequency 161.92

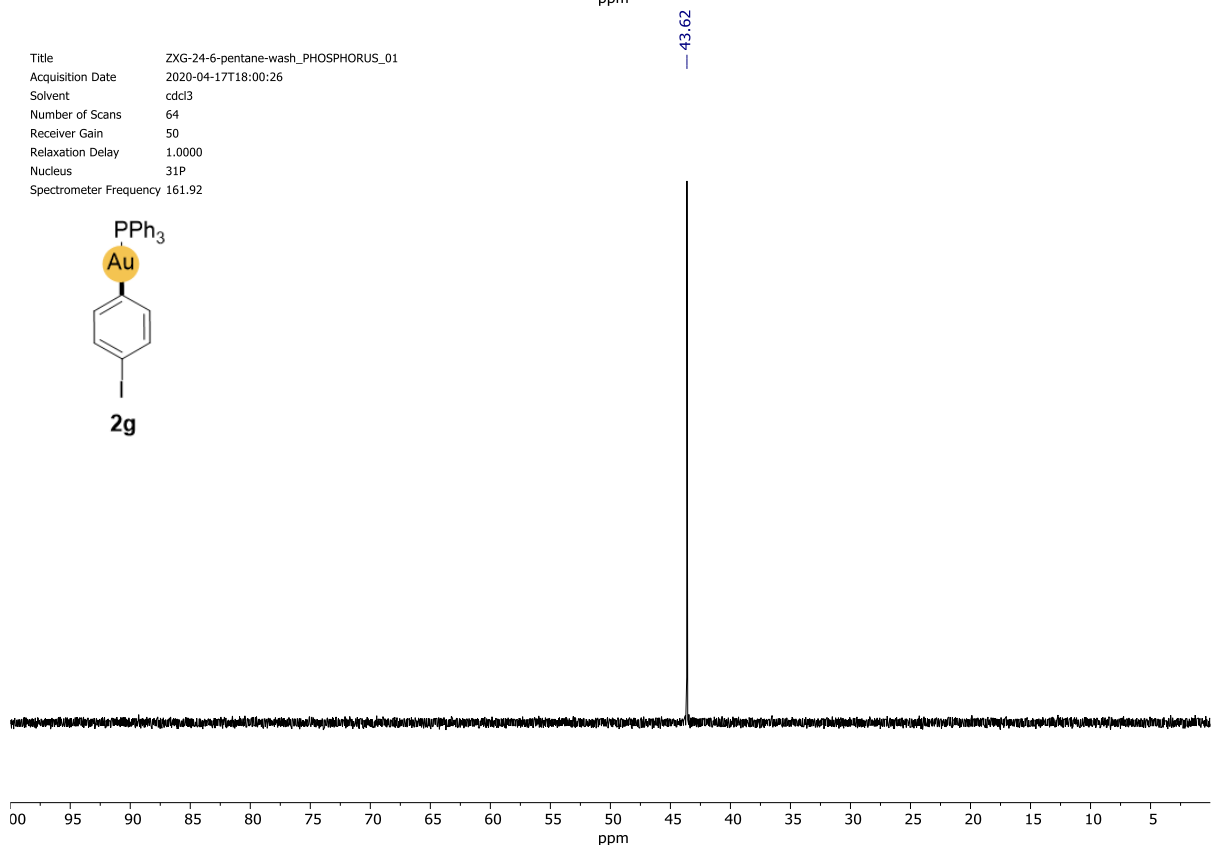

Title FI-262-01-F-CDCl3\_PROTON\_01  
 Solvent cdd3  
 Number of Scans 8  
 Receiver Gain 42  
 Relaxation Delay 1.0000  
 Acquisition Date 2018-09-17T19:24:10  
 Spectrometer Frequency 399.97  
 Nucleus 1H

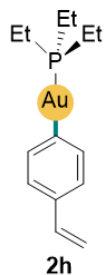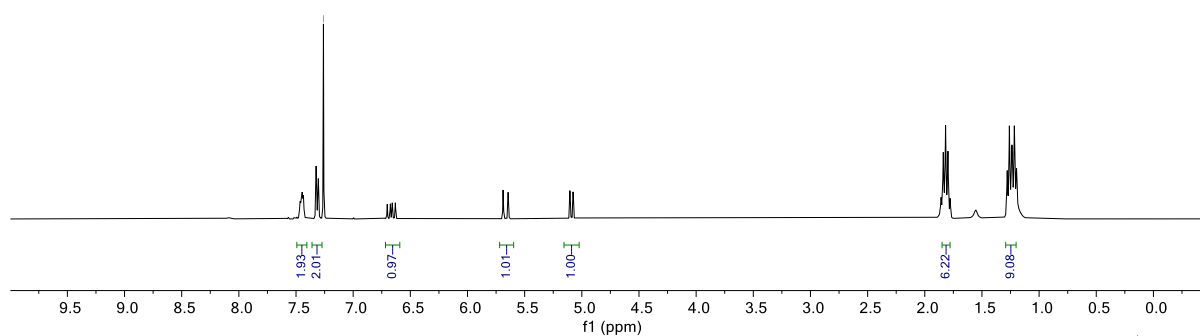

FI-382-01-25Hz-CDCl3\_PHOSPHORUS\_01

Title FI-382-01-25Hz-CDCl3\_PHOSPHORUS\_01  
 Solvent cdd3  
 Number of Scans 128  
 Receiver Gain 50  
 Relaxation Delay 1.0000  
 Acquisition Date 2020-04-02T16:29:53  
 Spectrometer Frequency 161.92  
 Nucleus 31P

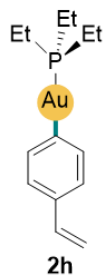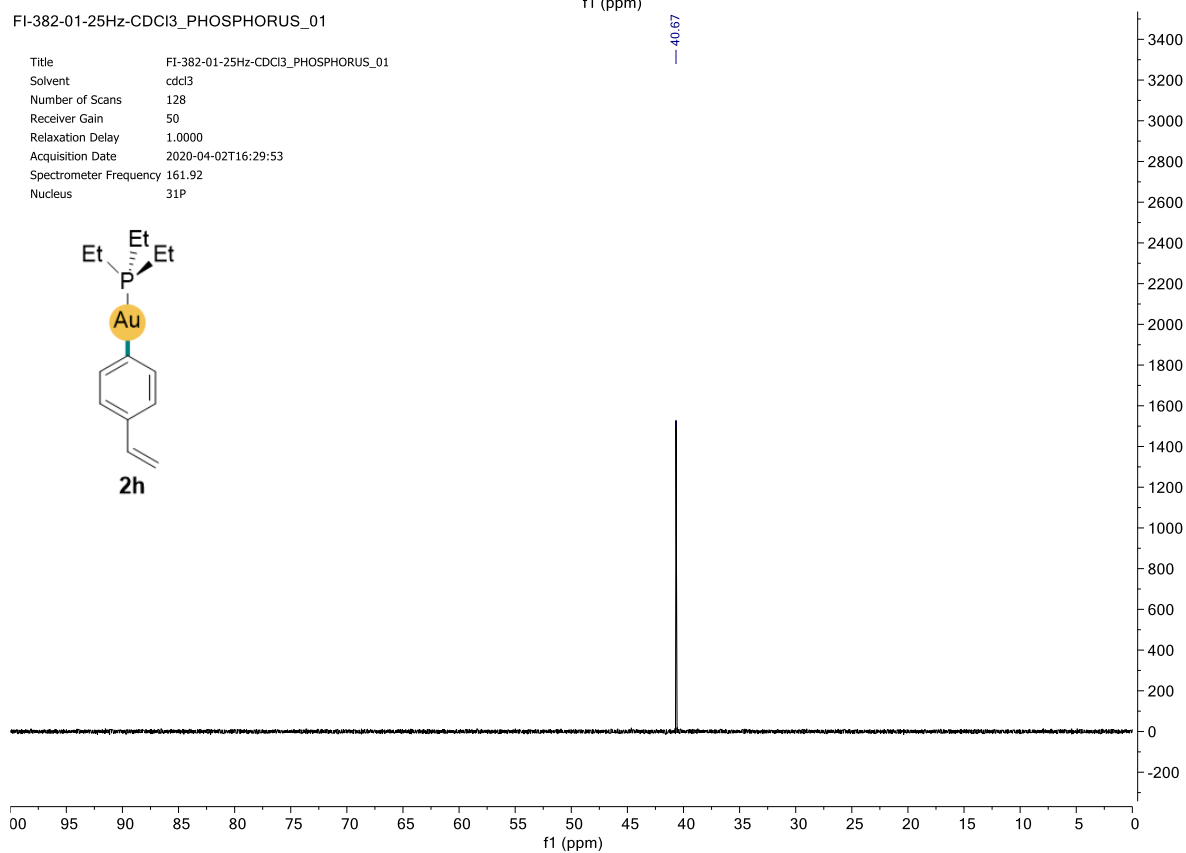

Title ZXG-20-4-filter-SI-2\_PROTON\_01  
 Acquisition Date 2020-04-02T03:33:58  
 Solvent c6d6  
 Number of Scans 32  
 Receiver Gain 42  
 Relaxation Delay 1.0000  
 Nucleus  $^1\text{H}$   
 Spectrometer Frequency 399.97

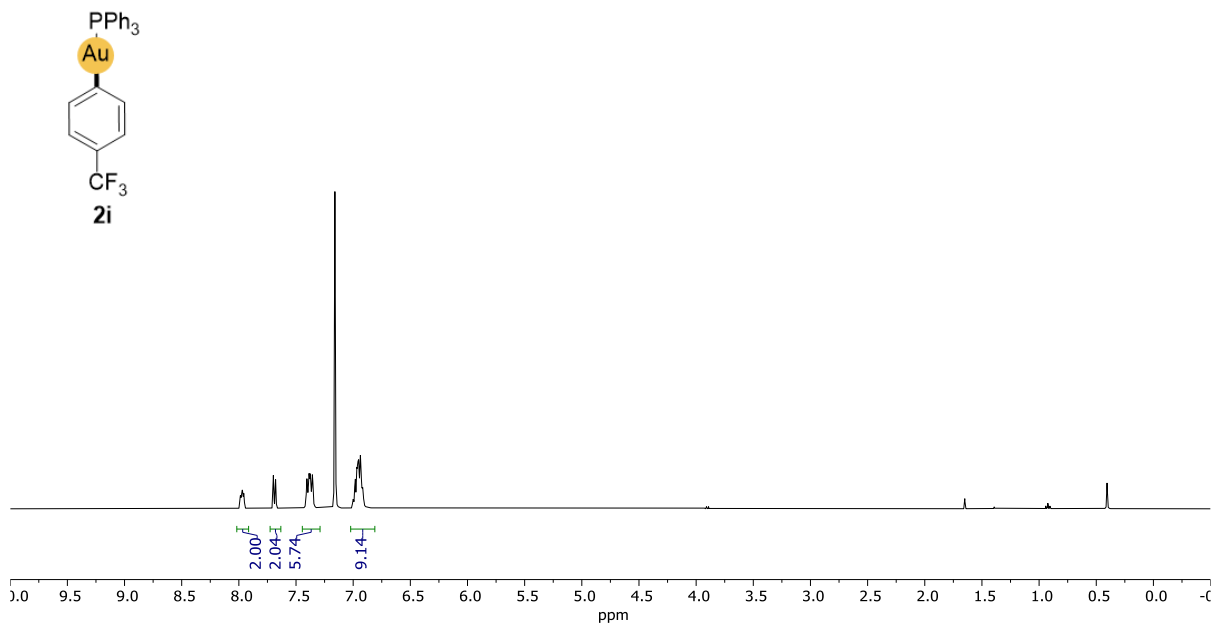

Title ZXG-20-4-filter\_FLUORINE\_01  
 Acquisition Date 2020-03-31T18:15:49  
 Solvent c6d6  
 Number of Scans 64  
 Receiver Gain 60  
 Relaxation Delay 1.0000  
 Nucleus  $^{19}\text{F}$   
 Spectrometer Frequency 376.31

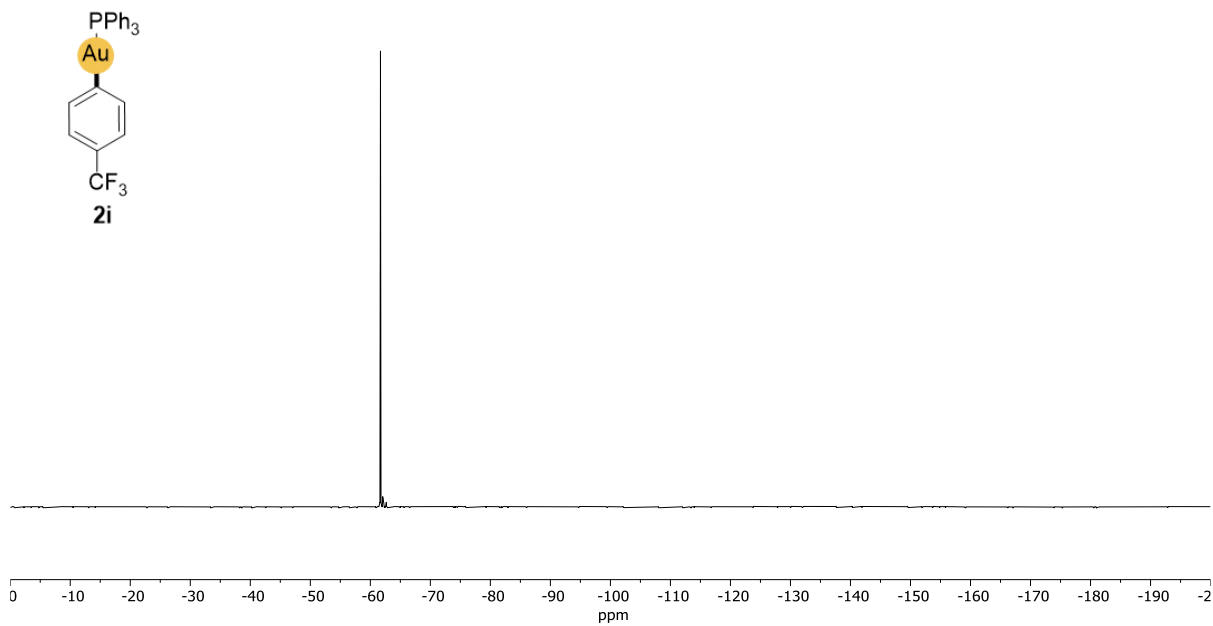



Title ZXG-20-4-filter\_PHOSPHORUS\_01  
 Acquisition Date 2020-03-31T18:20:23  
 Solvent c6d6  
 Number of Scans 64  
 Receiver Gain 50  
 Relaxation Delay 1.0000  
 Nucleus <sup>31</sup>P  
 Spectrometer Frequency 161.92

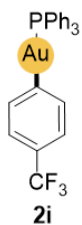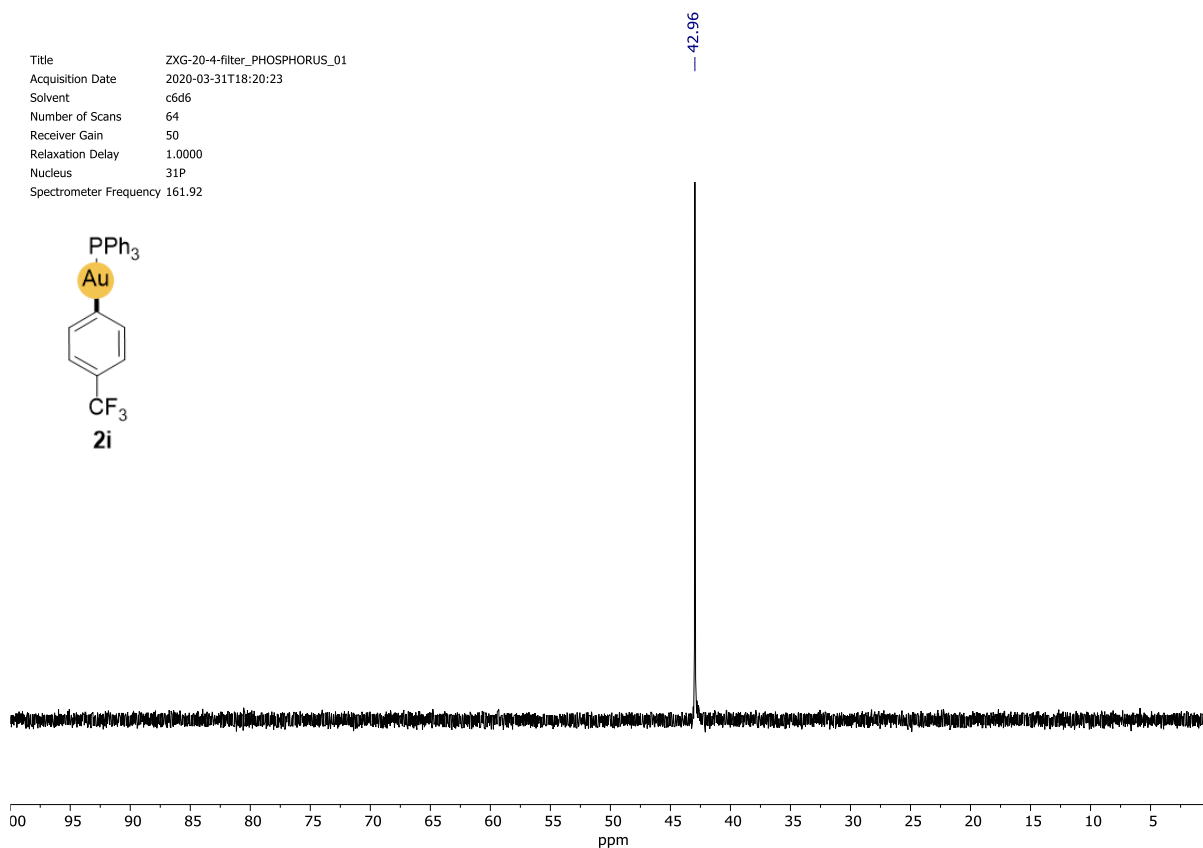

Title ZXG-20-4-filter2\_PROTON\_01  
 Acquisition Date 2020-04-03T11:37:07  
 Solvent cdd3  
 Number of Scans 32  
 Receiver Gain 48  
 Relaxation Delay 1.0000  
 Nucleus <sup>1</sup>H  
 Spectrometer Frequency 399.97

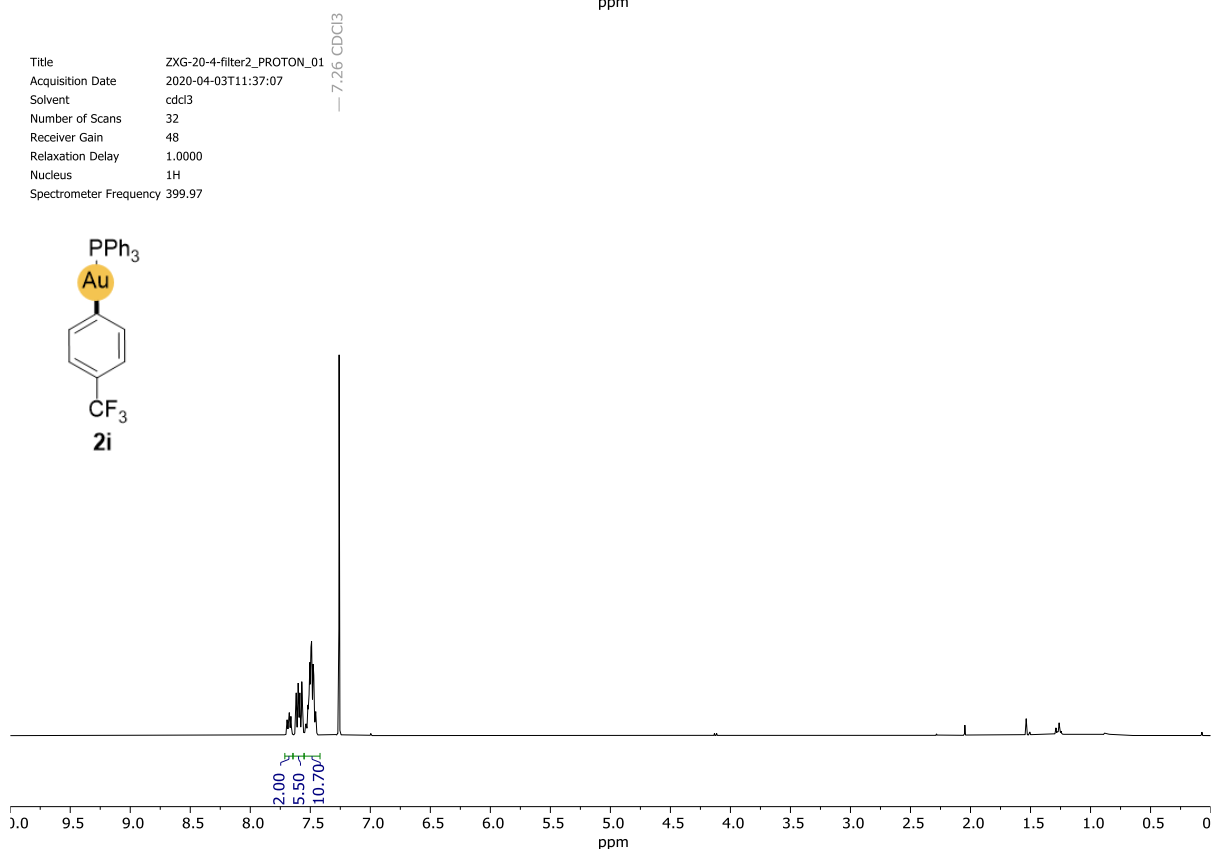

Title ZXG-20-4-filter-CDCl3\_PHOSPHORUS\_01  
Acquisition Date 2020-04-01T16:55:59  
Solvent cdc13  
Number of Scans 64  
Receiver Gain 50  
Relaxation Delay 1.0000  
Nucleus 31P  
Spectrometer Frequency 161.92

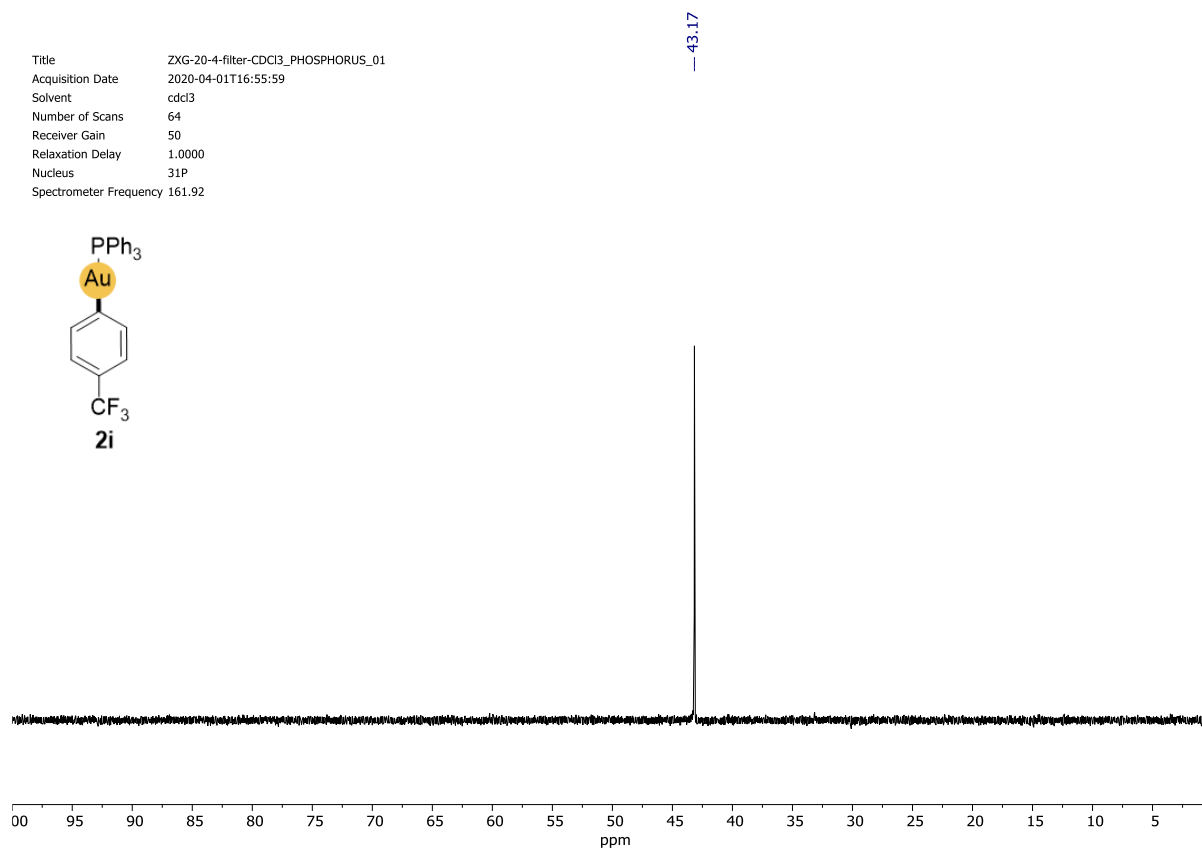

Title ZXG-10-4-filter\_PROTON\_01  
 Acquisition Date 2020-03-30T10:20:08  
 Solvent cdd3  
 Number of Scans 32  
 Receiver Gain 44  
 Relaxation Delay 1.0000  
 Nucleus  $^1\text{H}$   
 Spectrometer Frequency 399.97

— 7.26 CDCl<sub>3</sub>

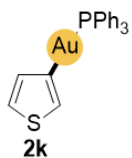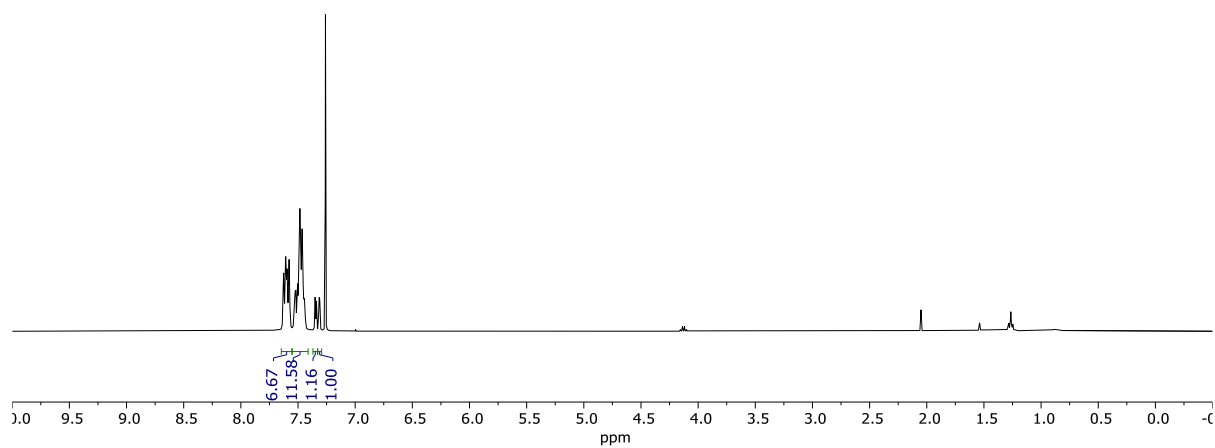

Title ZXG-10-4-filter\_PHOSPHORUS\_01  
 Acquisition Date 2020-03-30T10:24:05  
 Solvent cdd3  
 Number of Scans 64  
 Receiver Gain 50  
 Relaxation Delay 1.0000  
 Nucleus  $^{31}\text{P}$   
 Spectrometer Frequency 161.92

— 44.01

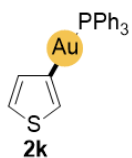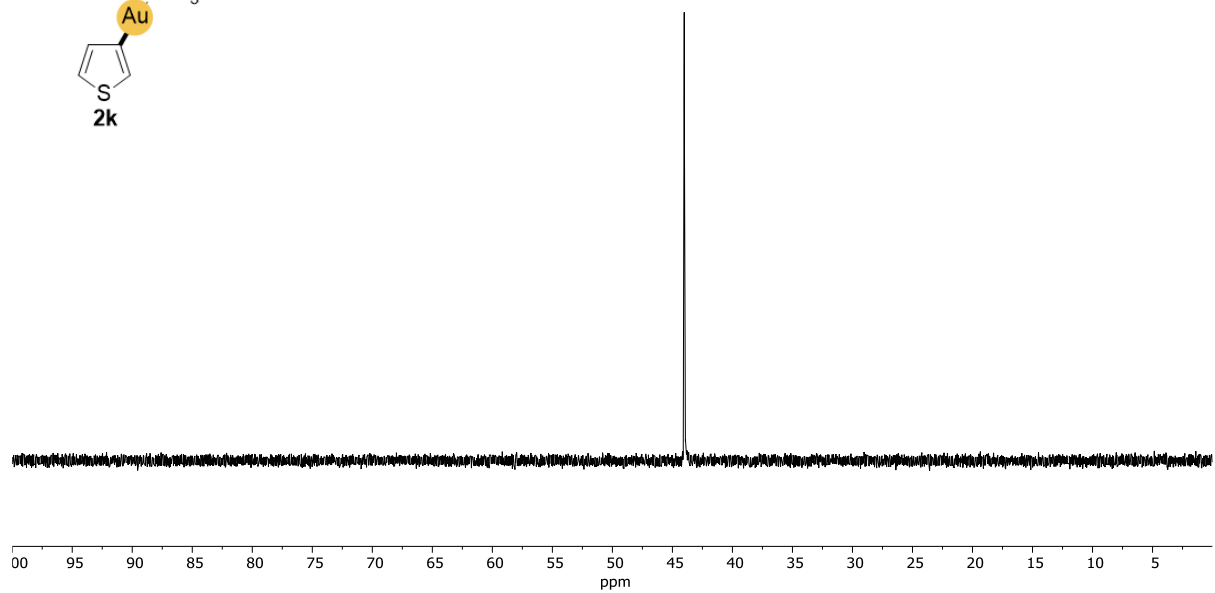

Title ZXG-22-5-filter-SI\_PROTON\_01  
 Acquisition Date 2020-04-14T20:05:54  
 Solvent ccd3  
 Number of Scans 32  
 Receiver Gain 52  
 Relaxation Delay 1.0000  
 Nucleus 1H  
 Spectrometer Frequency 399.97

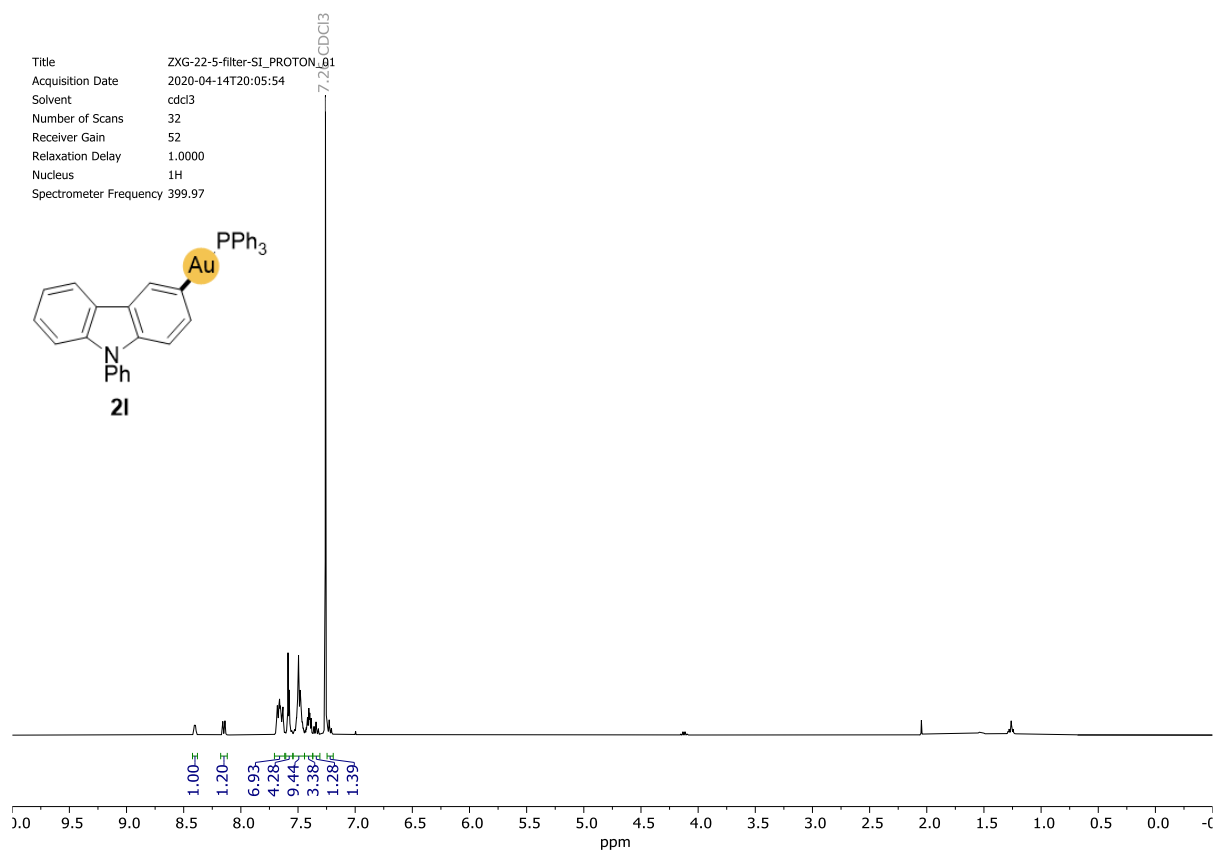

Title ZXG-22-5-filter-solid\_PHOSPHORUS\_01  
 Acquisition Date 2020-04-14T14:26:53  
 Solvent ccd3  
 Number of Scans 64  
 Receiver Gain 50  
 Relaxation Delay 1.0000  
 Nucleus 31P  
 Spectrometer Frequency 161.92

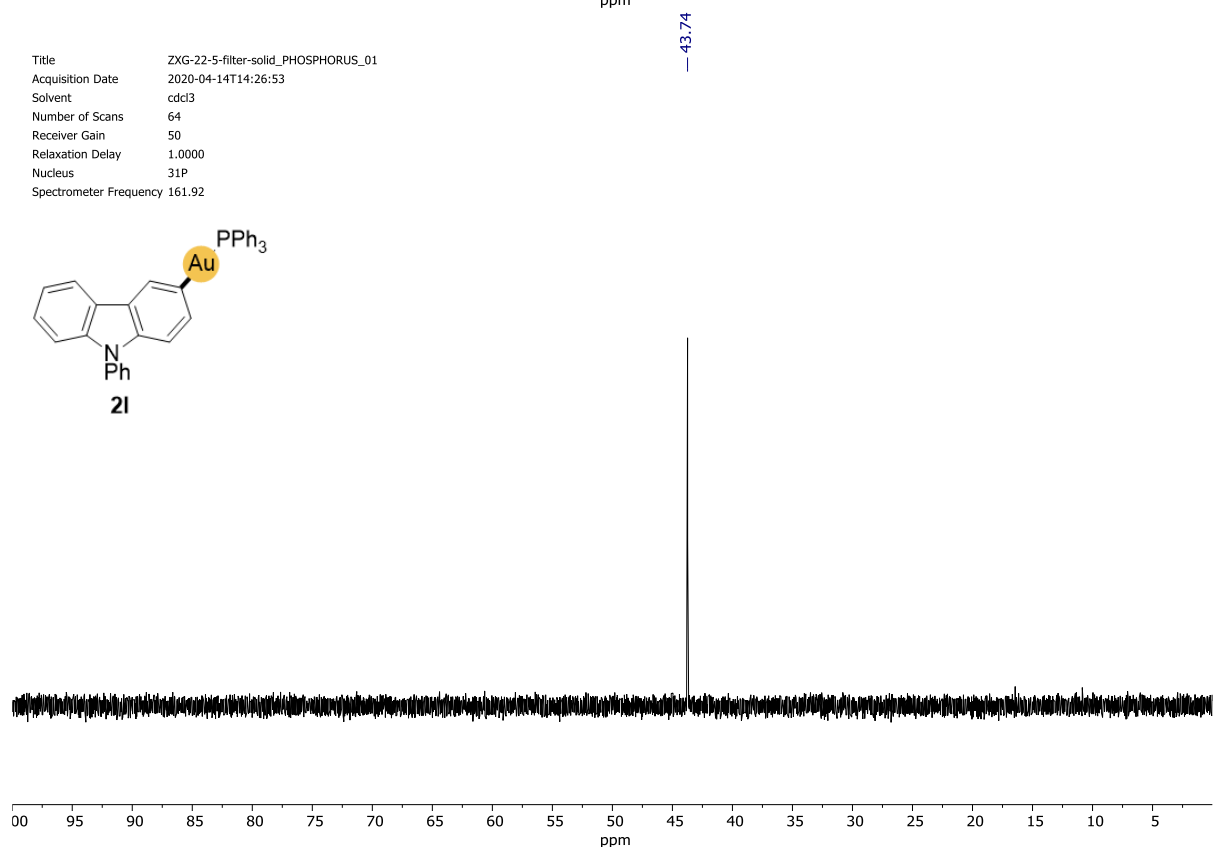

## **C-H Auration of haloarenes (Scheme 2)**

Title FI-261-07-SiO2Filt-CDCl3\_PROTON\_01  
 Solvent ccd3  
 Number of Scans 8  
 Receiver Gain 40  
 Relaxation Delay 1.0000  
 Acquisition Date 2020-04-10T18:27:50  
 Spectrometer Frequency 399.97  
 Nucleus 1H

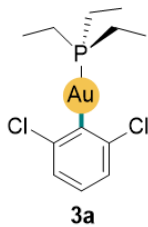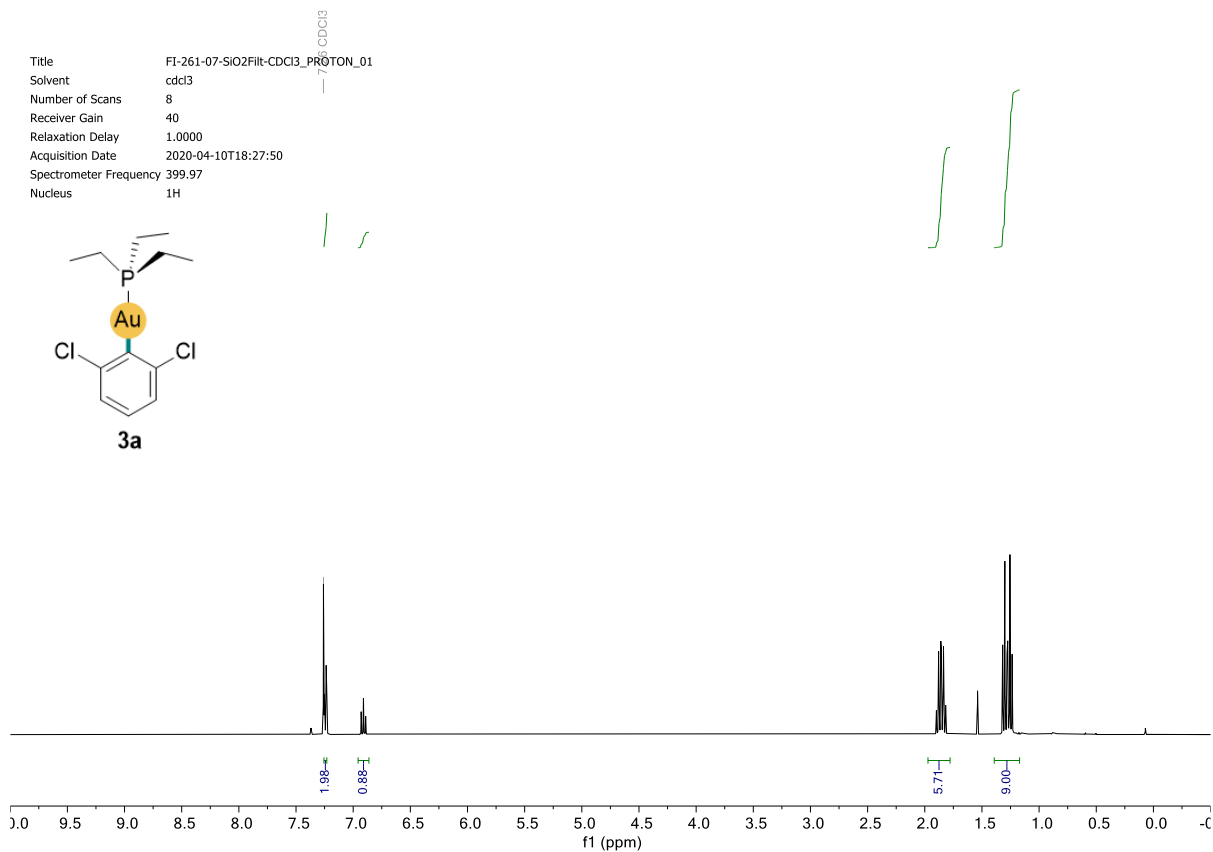

Title FI-261-07-SiO2Filt-CDCl3\_PHOSPHORUS\_01  
 Solvent ccd3  
 Number of Scans 64  
 Receiver Gain 50  
 Relaxation Delay 1.0000  
 Acquisition Date 2020-04-10T18:31:01  
 Spectrometer Frequency 161.92  
 Nucleus 31P

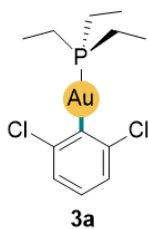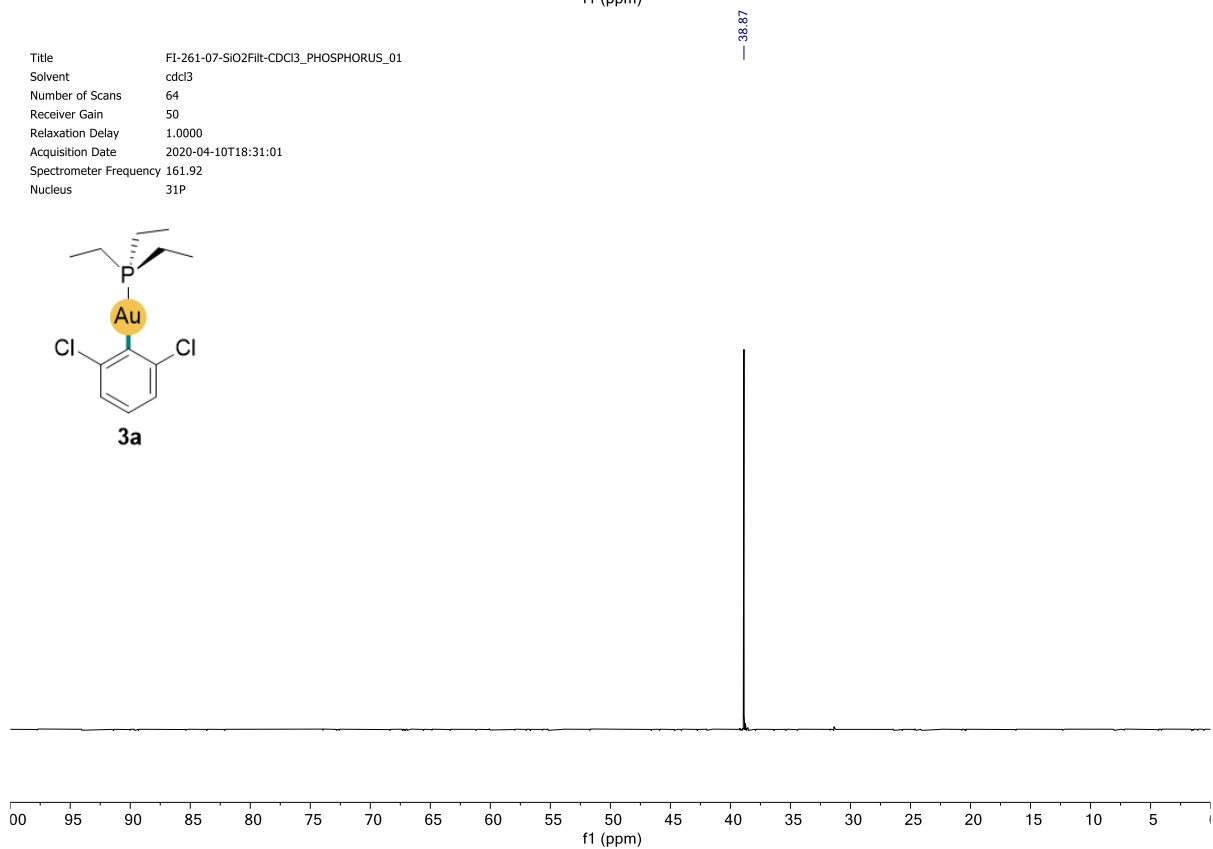

Title FI-263-03-SiO2plug-CDCl3\_PROTON\_01  
 Solvent ccd3  
 Number of Scans 64  
 Receiver Gain 44  
 Relaxation Delay 1.0000  
 Acquisition Date 2020-04-10T19:49:54  
 Spectrometer Frequency 399.97  
 Nucleus 1H

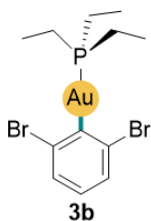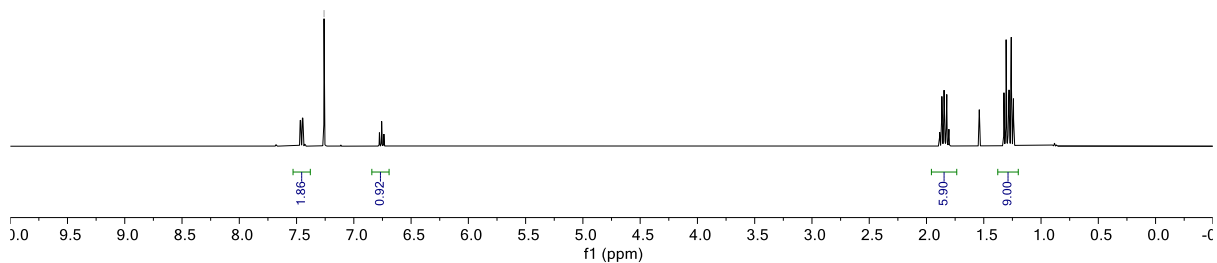

Title FI-263-03-SiO2plug-CDCl3\_PHOSPHORUS\_01  
 Solvent ccd3  
 Number of Scans 128  
 Receiver Gain 50  
 Relaxation Delay 1.0000  
 Acquisition Date 2020-04-10T19:55:53  
 Spectrometer Frequency 161.92  
 Nucleus 31P

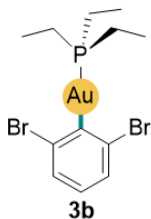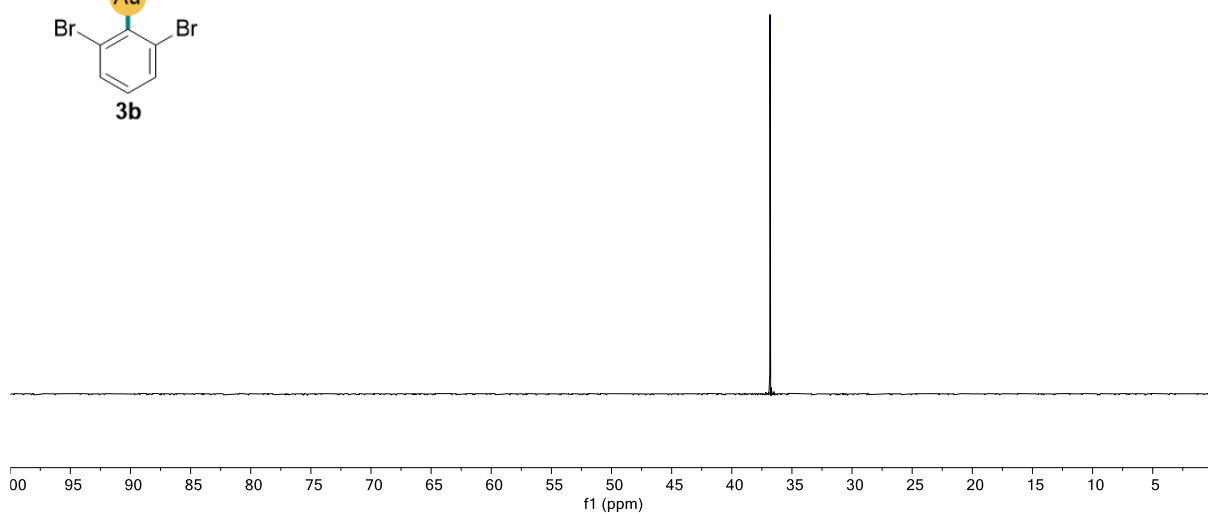

Title ZXG-26-2-filter-2\_PROTON\_01  
 Acquisition Date 2020-04-20T12:30:42  
 Solvent cdcl3  
 Number of Scans 32  
 Receiver Gain 48  
 Relaxation Delay 1.0000  
 Nucleus <sup>1</sup>H  
 Spectrometer Frequency 399.97

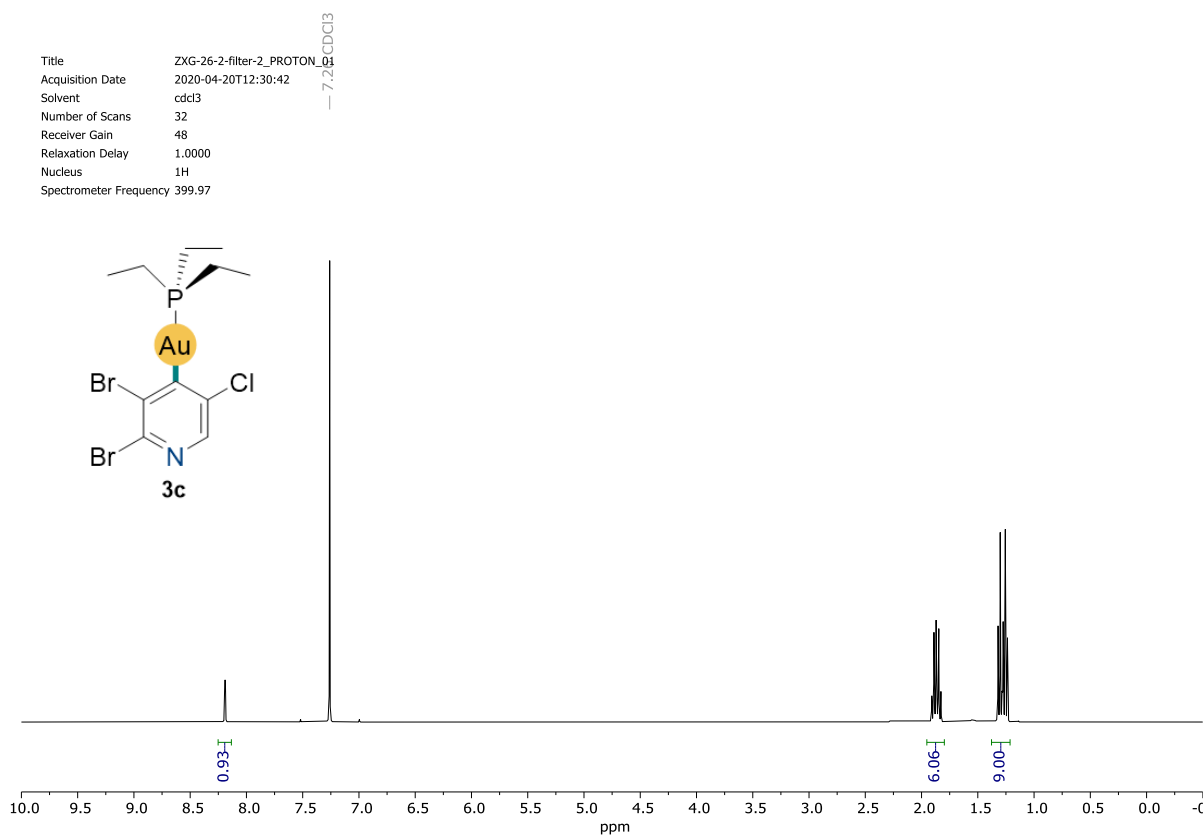

Title ZXG-26-2-filter-SL CARBON  
 Acquisition Date 2020-04-21T01:57:16  
 Solvent cdcl3  
 Number of Scans 5000  
 Receiver Gain 30  
 Relaxation Delay 1.0000  
 Nucleus <sup>13</sup>C  
 Spectrometer Frequency 100.58

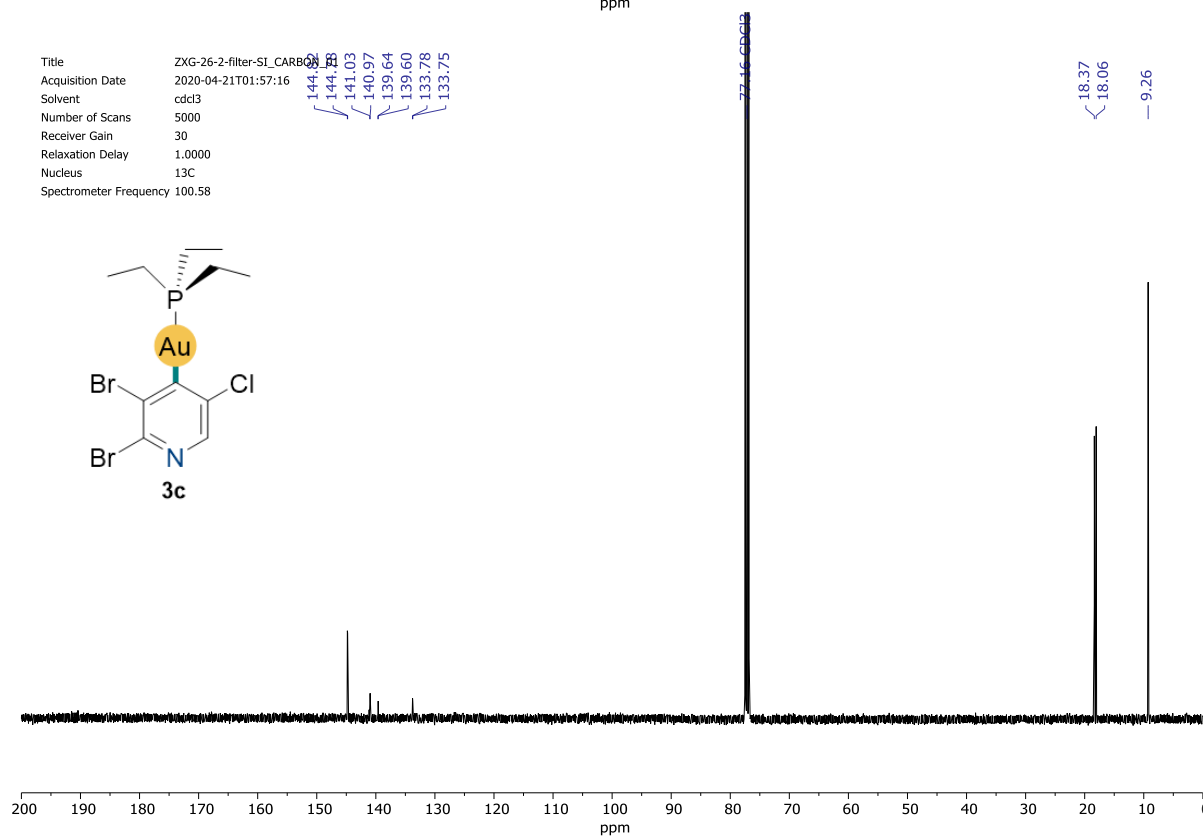



Title ZYG-26-2-filter-2\_PHOSPHORUS\_01  
Acquisition Date 2020-04-20T12:34:44  
Solvent cdcl3  
Number of Scans 64  
Receiver Gain 50  
Relaxation Delay 1.0000  
Nucleus 31P  
Spectrometer Frequency 161.92

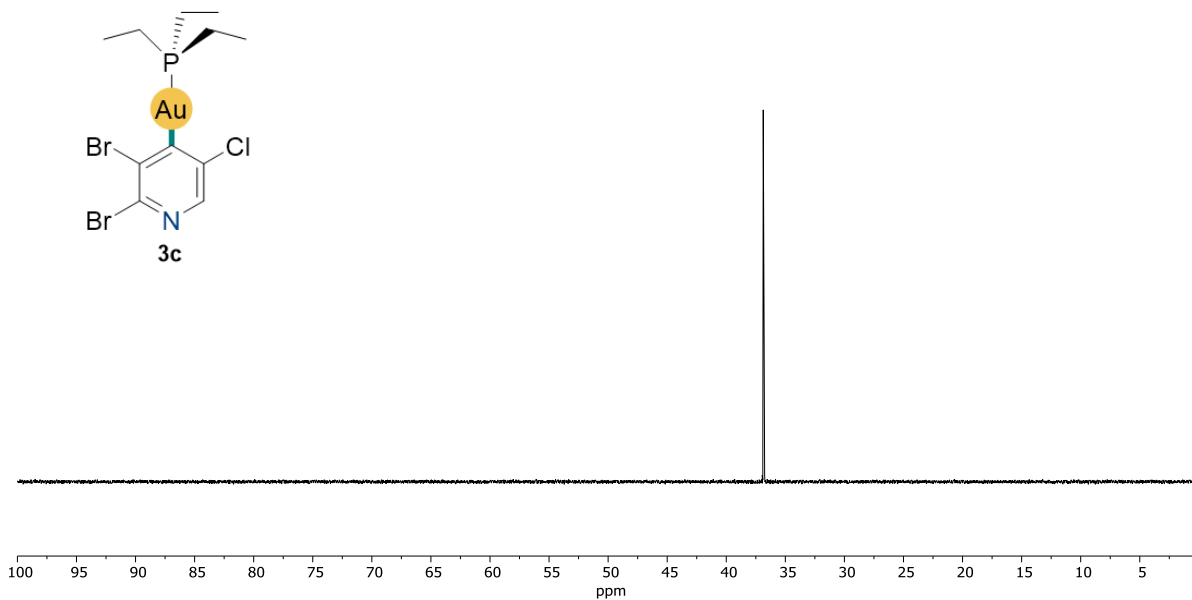

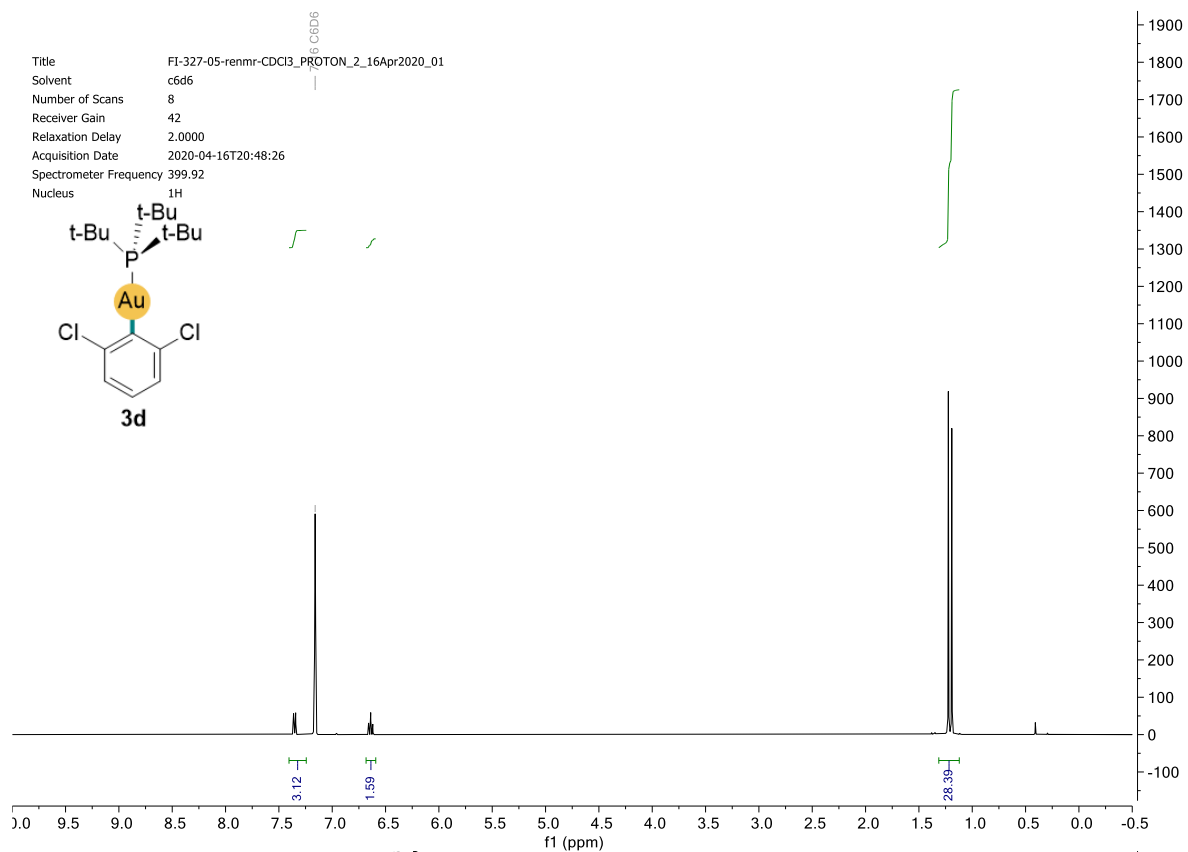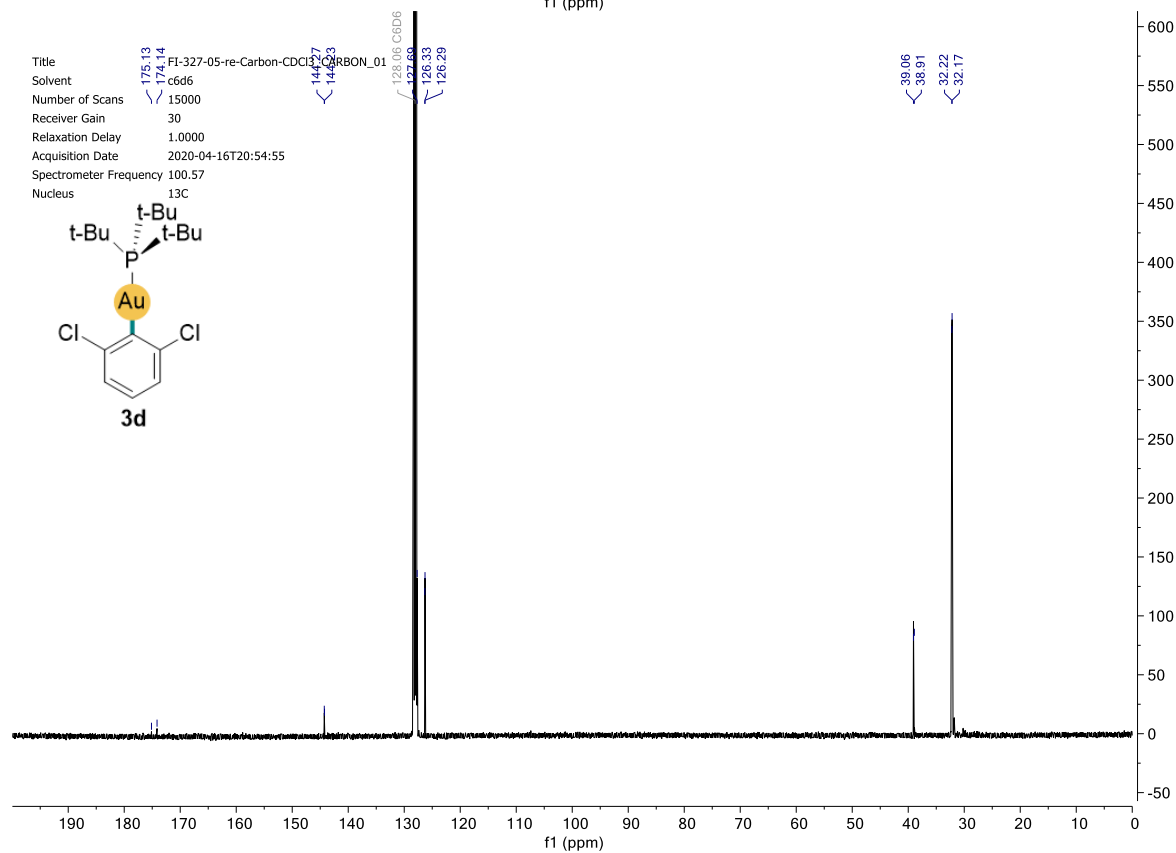

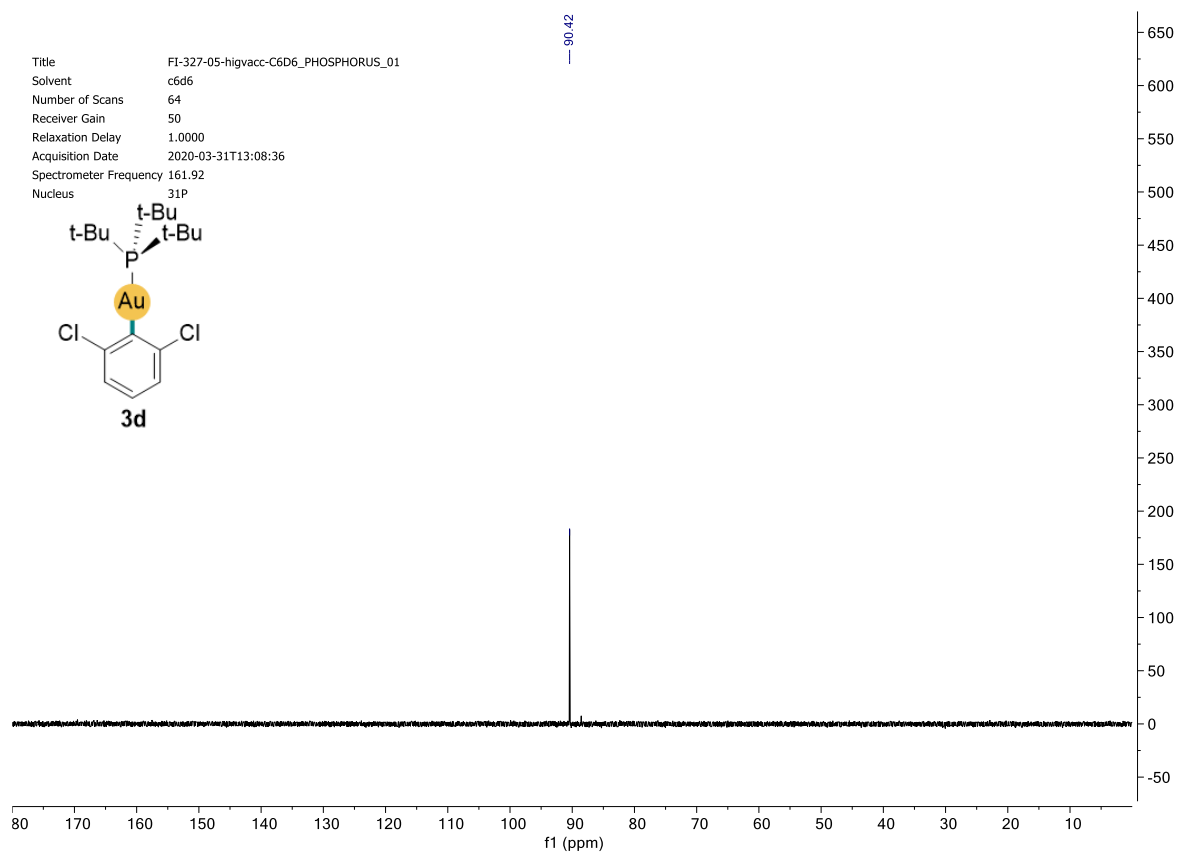

Title FI-352-01-CDCI3\_PROTON\_01  
 Solvent cdd3  
 Number of Scans 8  
 Receiver Gain 32  
 Relaxation Delay 1.0000  
 Acquisition Date 2019-12-13T17:31:49  
 Spectrometer Frequency 399.97  
 Nucleus 1H

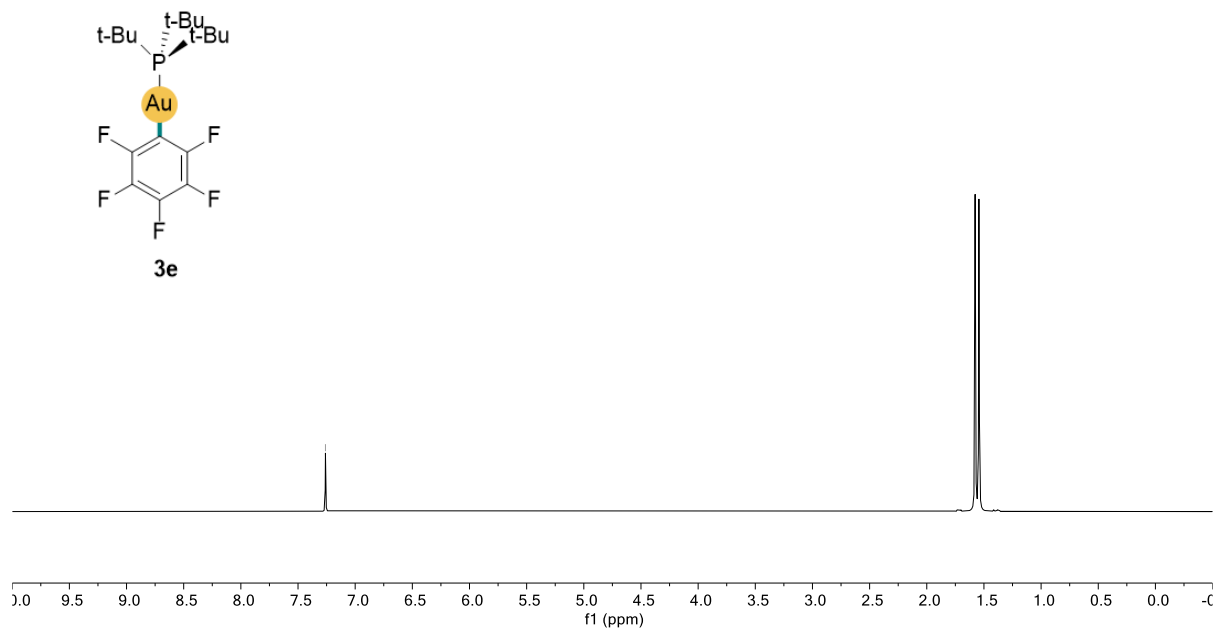

Title FI-352-01-CDCI3\_FLUORINE\_01  
 Solvent cdd3  
 Number of Scans 16  
 Receiver Gain 52  
 Relaxation Delay 1.0000  
 Acquisition Date 2019-12-13T17:34:41  
 Spectrometer Frequency 376.31  
 Nucleus 19F

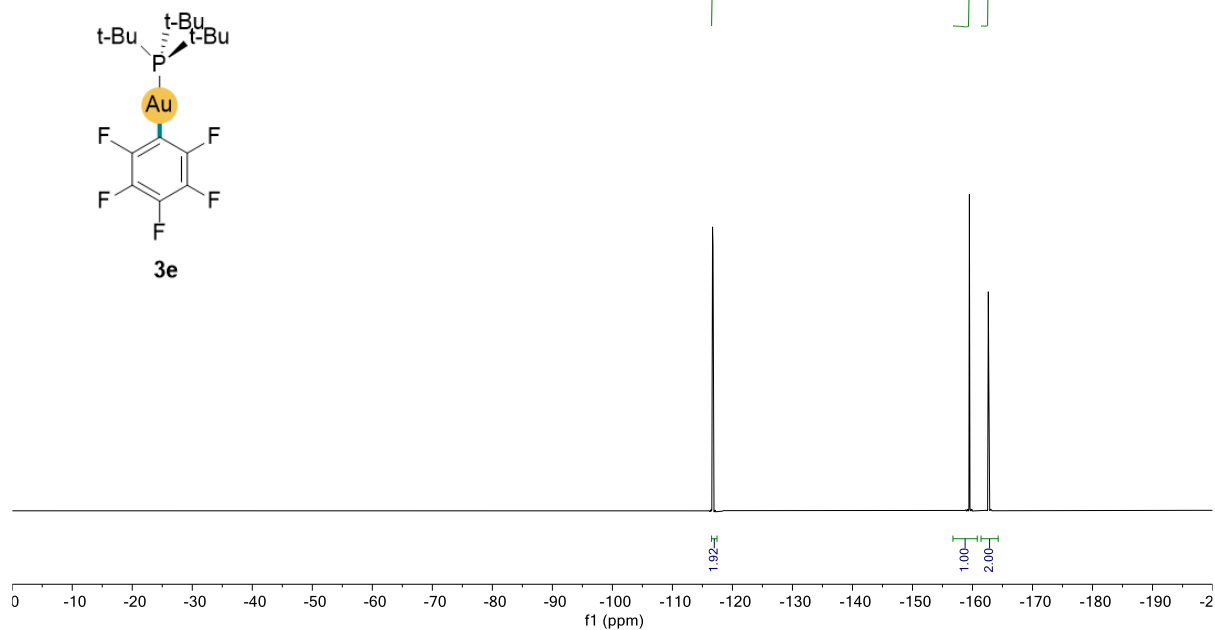

Title FI-352-01-CDCI3\_PHOSPHORUS\_01  
 Solvent ccd3  
 Number of Scans 64  
 Receiver Gain 50  
 Relaxation Delay 1.0000  
 Acquisition Date 2019-12-13T17:25:19  
 Spectrometer Frequency 161.92  
 Nucleus 31P

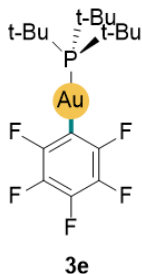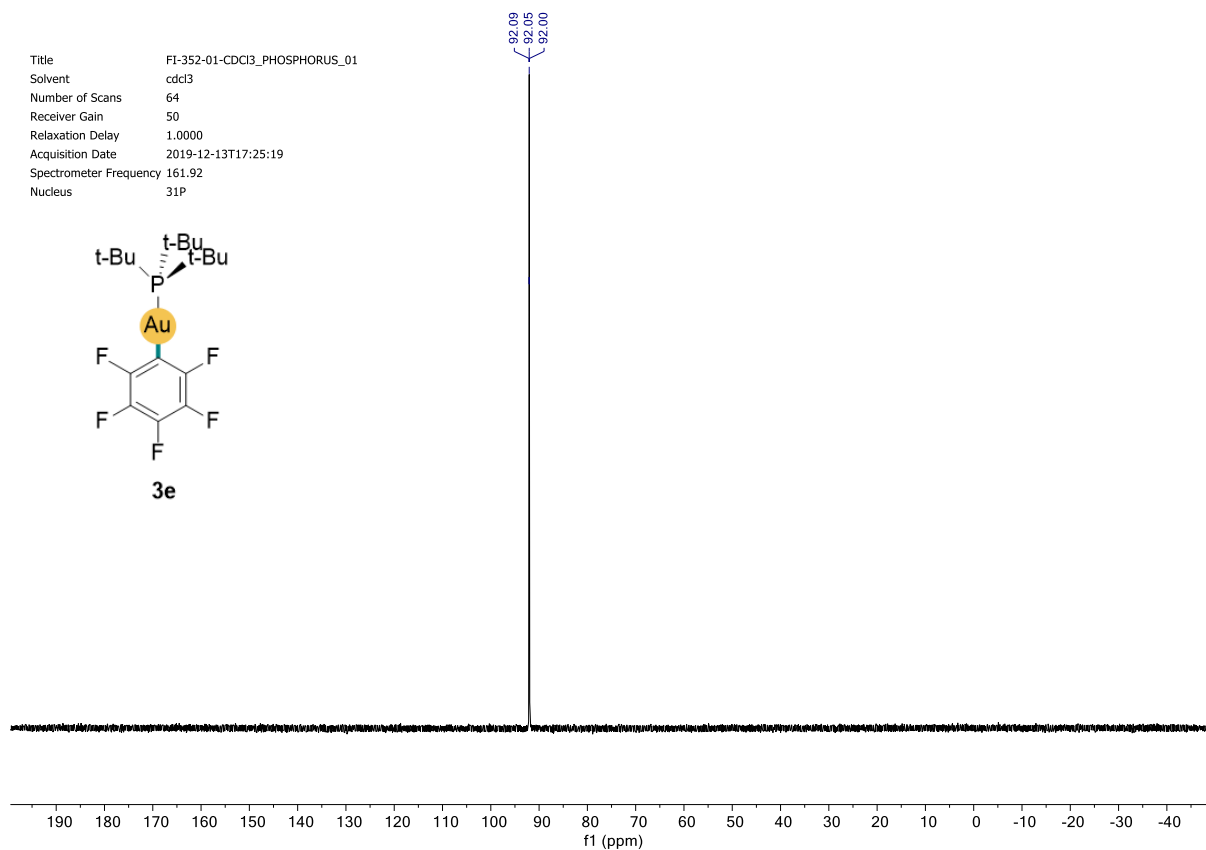

Title LP-Au-3-halopyr-column\_PROTON\_01  
 Solvent ccd3  
 Number of Scans 32  
 Receiver Gain 36  
 Relaxation Delay 4.0000  
 Acquisition Date 2018-10-24T11:31:51  
 Spectrometer Frequency 399.94  
 Nucleus 1H

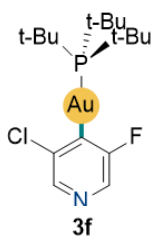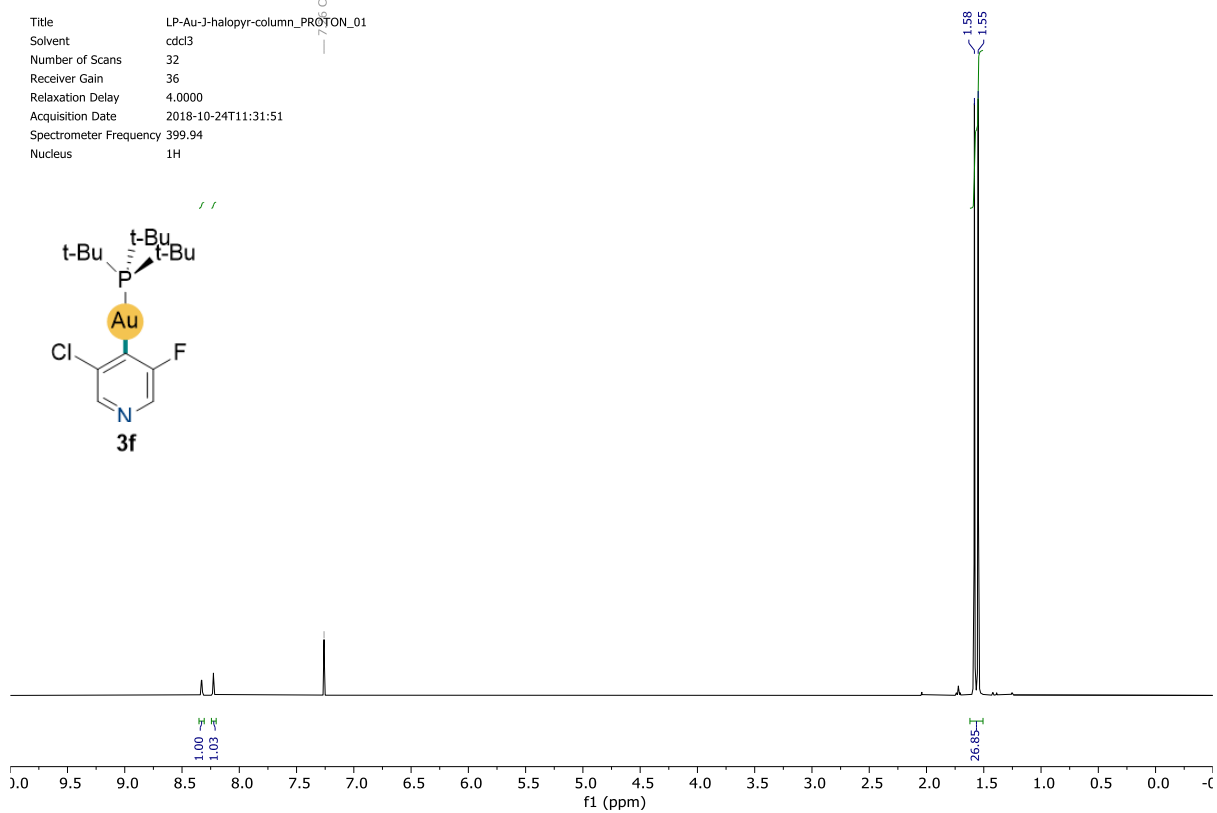

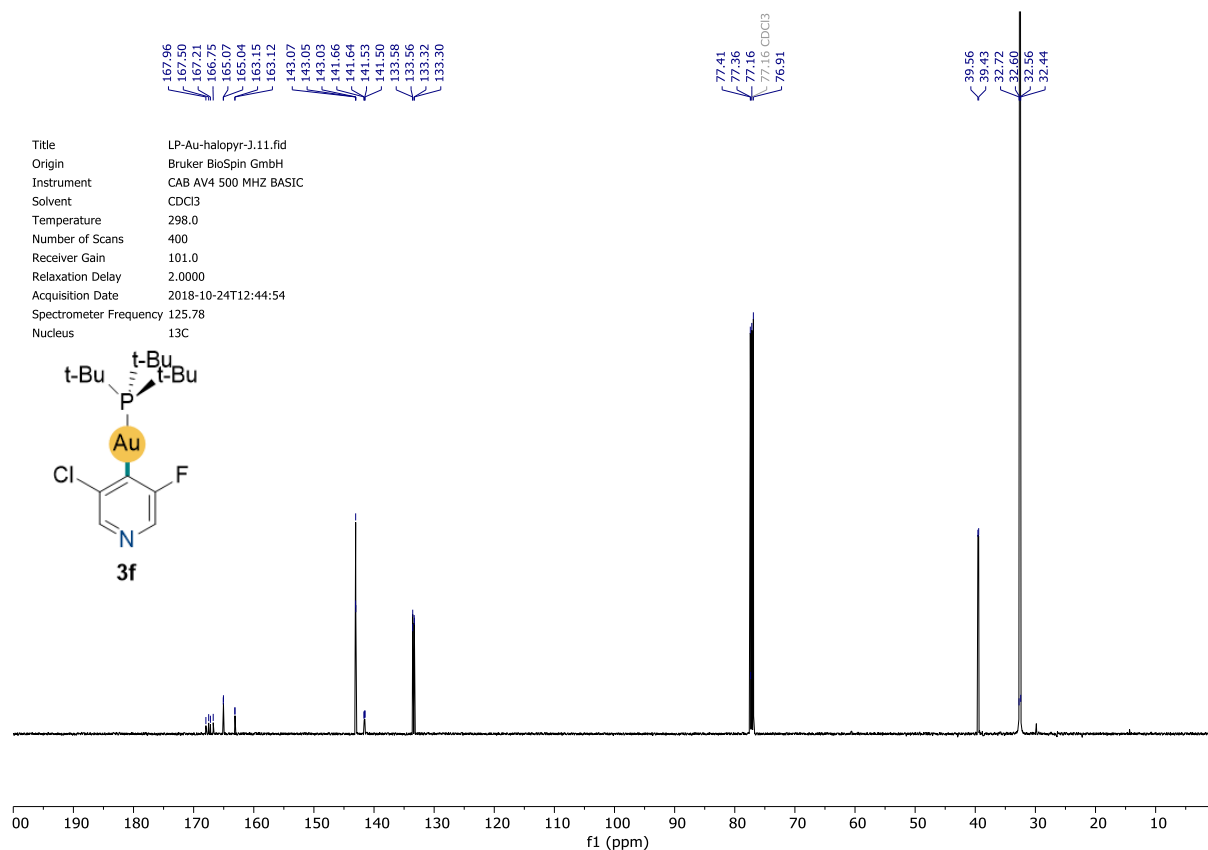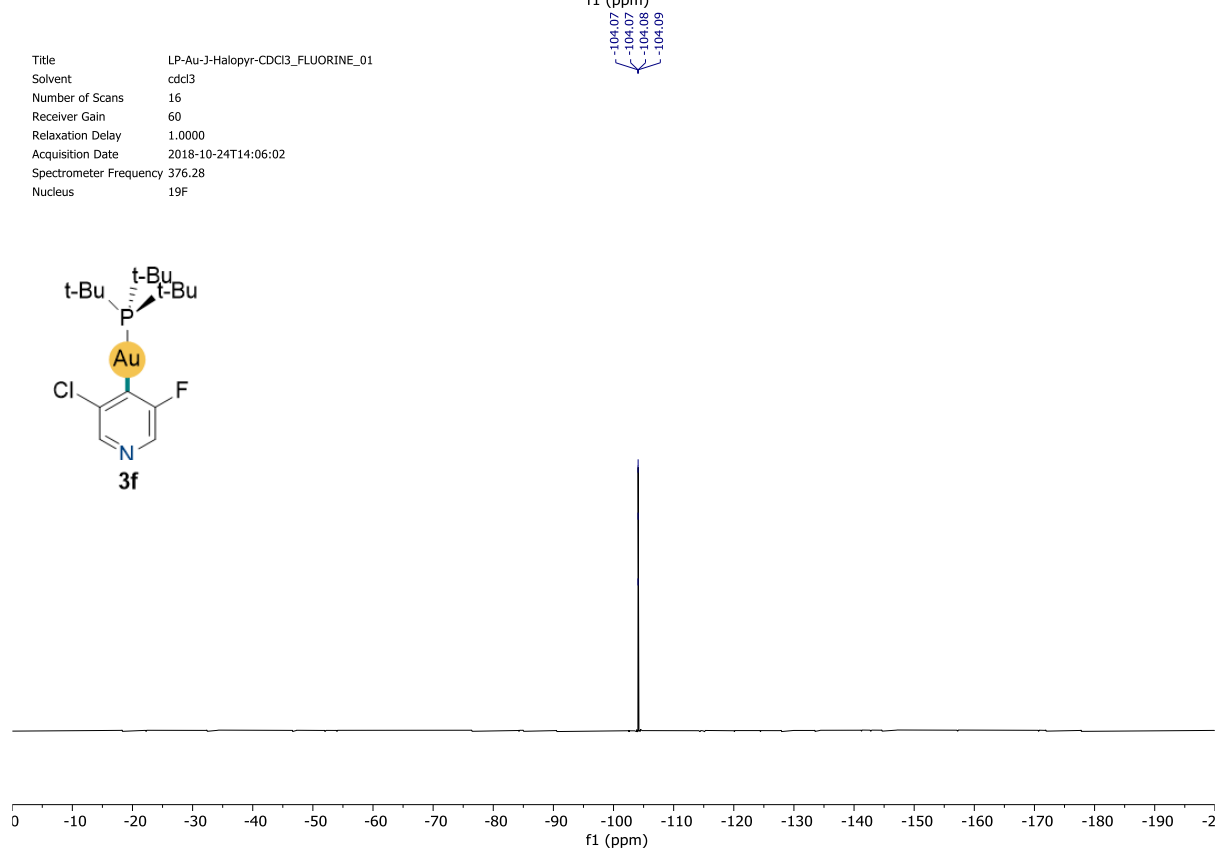

Title LP-Au-3-halopyr-CDCl3\_PHOSPHORUS\_01  
Solvent ccd3  
Number of Scans 64  
Receiver Gain 50  
Relaxation Delay 1.0000  
Acquisition Date 2018-10-24T13:32:41  
Spectrometer Frequency 161.92  
Nucleus 31P

91.19  
91.15

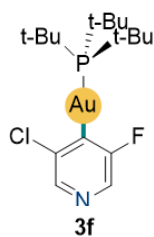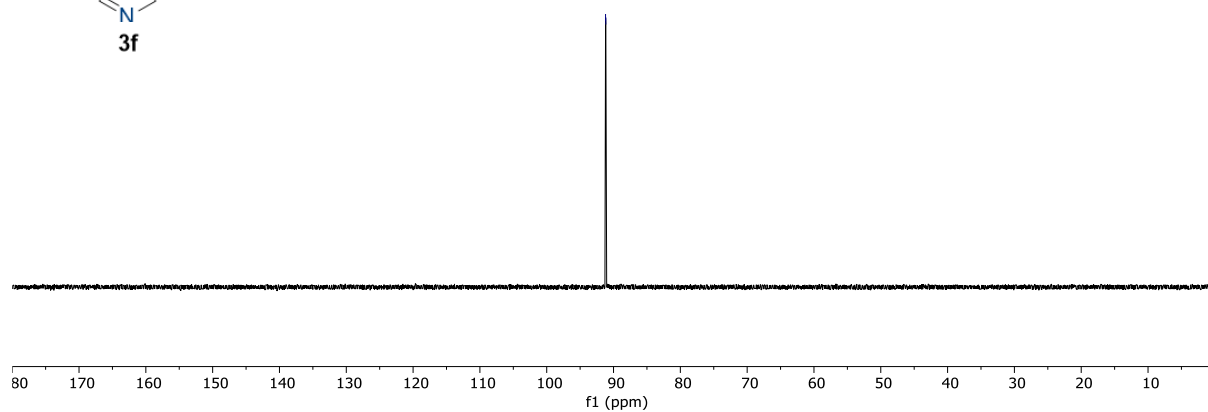

Title FI-391-01-CDCl3\_PROTON\_01  
 Solvent cdd3  
 Number of Scans 8  
 Receiver Gain 34  
 Relaxation Delay 1.0000  
 Acquisition Date 2020-04-22T17:59:47  
 Spectrometer Frequency 399.97  
 Nucleus 1H

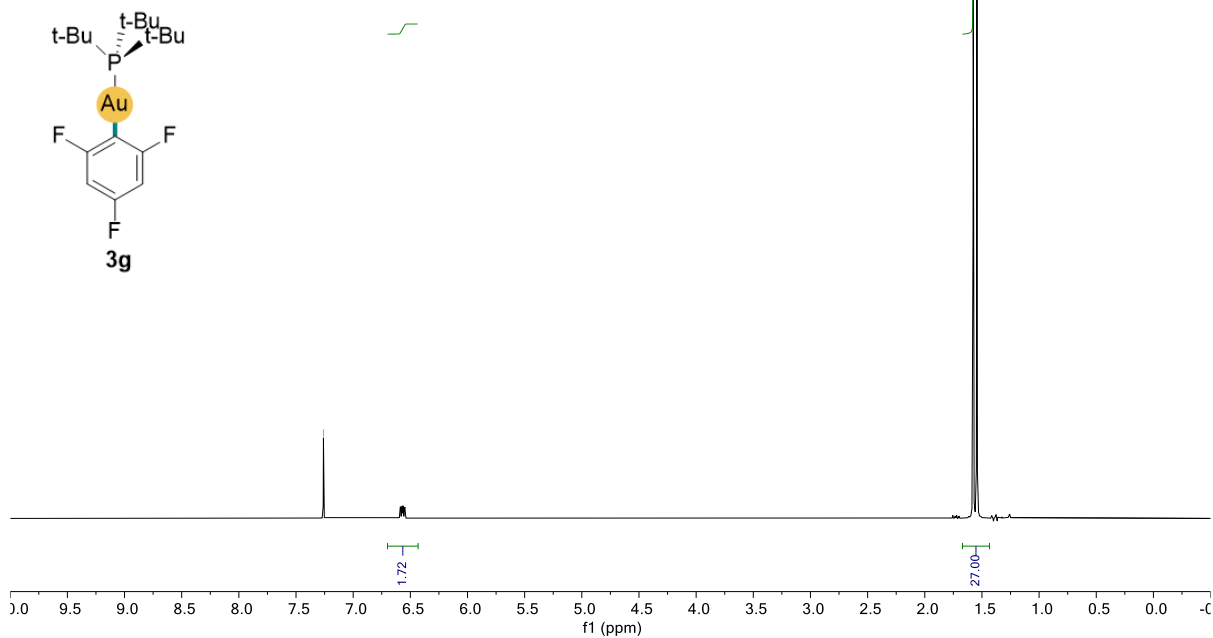

Title FI-391-01-CDCl3\_FLUORINE\_01  
 Solvent cdd3  
 Number of Scans 16  
 Receiver Gain 60  
 Relaxation Delay 1.0000  
 Acquisition Date 2020-04-22T18:08:55  
 Spectrometer Frequency 376.31  
 Nucleus 19F

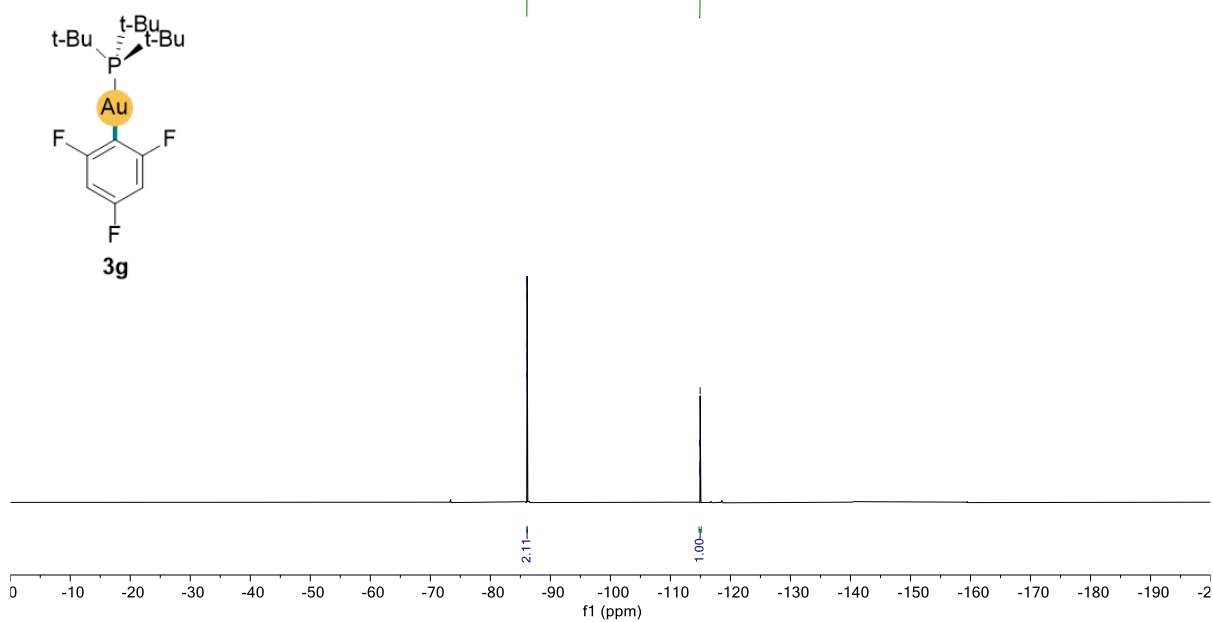



Title FI-391-01-CDCl3\_PHOSPHORUS\_01  
Solvent ccd3  
Number of Scans 64  
Receiver Gain 50  
Relaxation Delay 1.0000  
Acquisition Date 2020-04-22T18:02:51  
Spectrometer Frequency 161.92  
Nucleus 31P

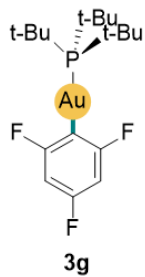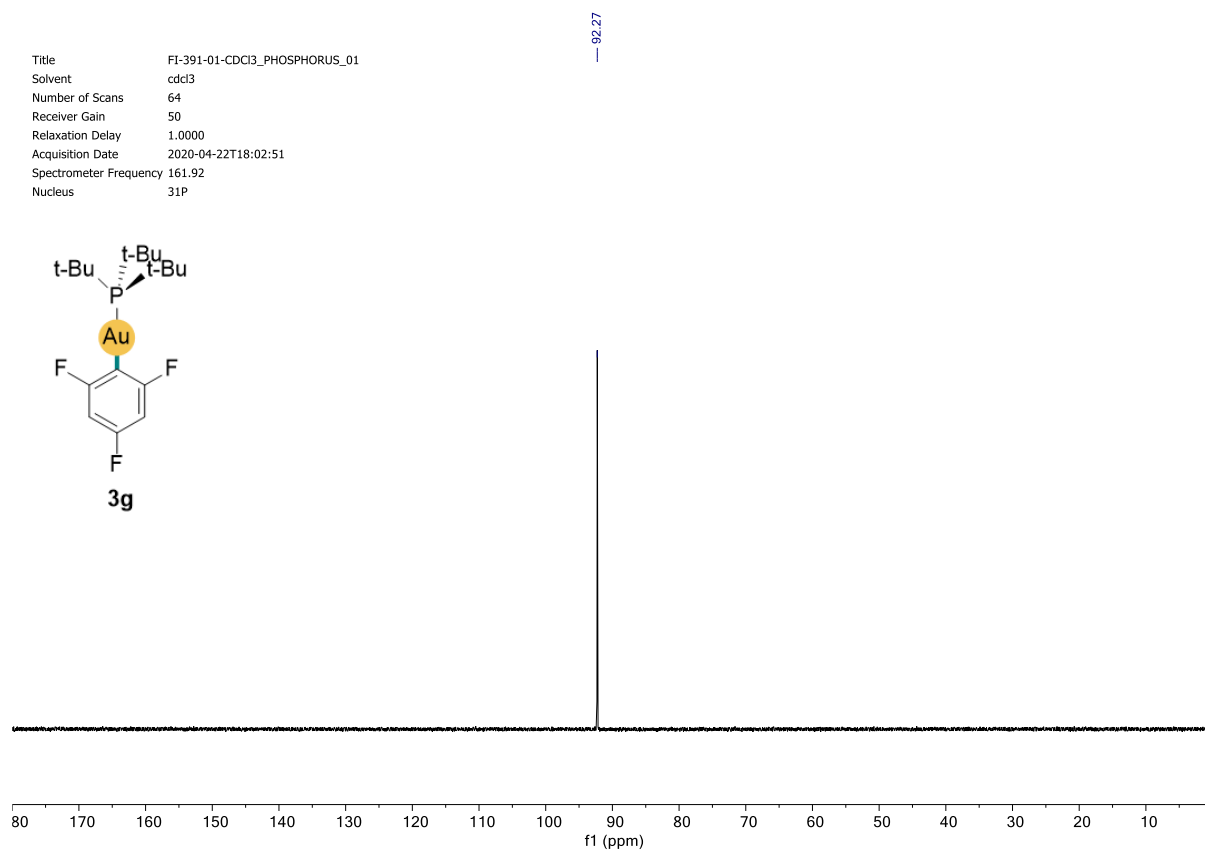

## **C-H Auration of heteroarenes (Scheme 3)**

Title FI-264-05-EtOAcflush-CDCl3\_PROTON\_01  
 Solvent cdc13  
 Number of Scans 8  
 Receiver Gain 42  
 Relaxation Delay 1.0000  
 Acquisition Date 2020-04-07T11:43:49  
 Spectrometer Frequency 399.97  
 Nucleus 1H

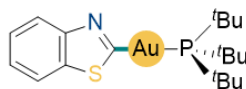

**4a**

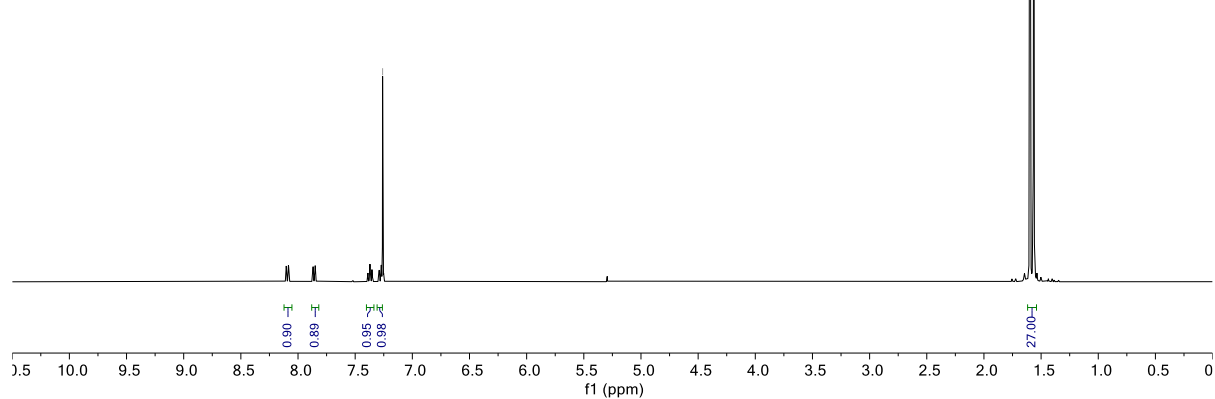

Title FI-264-05-EtOAcflush-CDCl3\_PHOSPHORUS\_01  
 Solvent cdc13  
 Number of Scans 64  
 Receiver Gain 50  
 Relaxation Delay 1.0000  
 Acquisition Date 2020-04-07T11:46:46  
 Spectrometer Frequency 161.92  
 Nucleus 31P

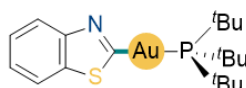

**4a**

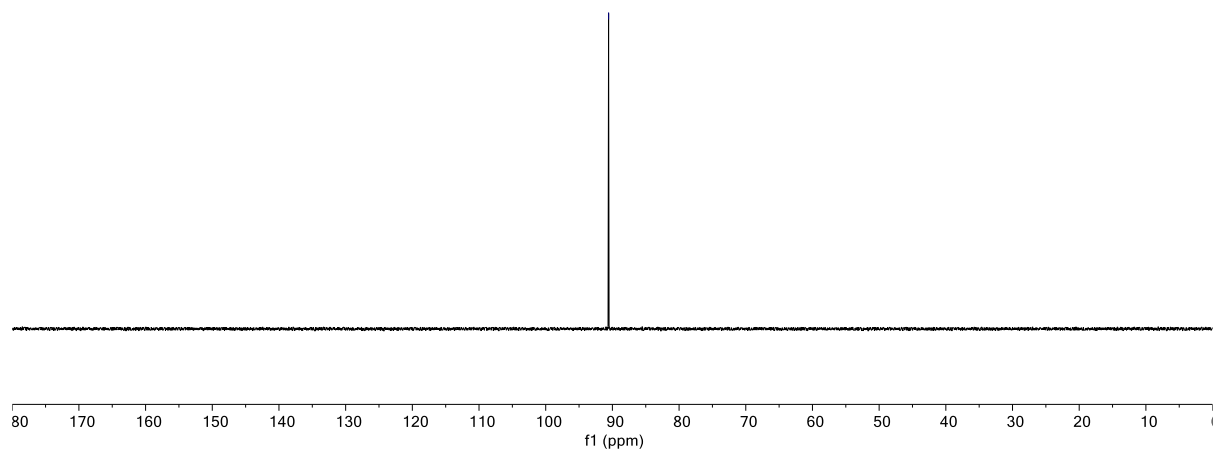

Title ZXG-29-1-col-f-all-dry\_PROTON\_01  
 Acquisition Date 2020-04-23T09:31:51  
 Solvent cdd3  
 Number of Scans 32  
 Receiver Gain 38  
 Relaxation Delay 1.0000  
 Nucleus  $^1\text{H}$   
 Spectrometer Frequency 399.97

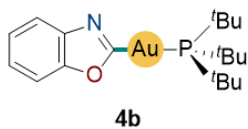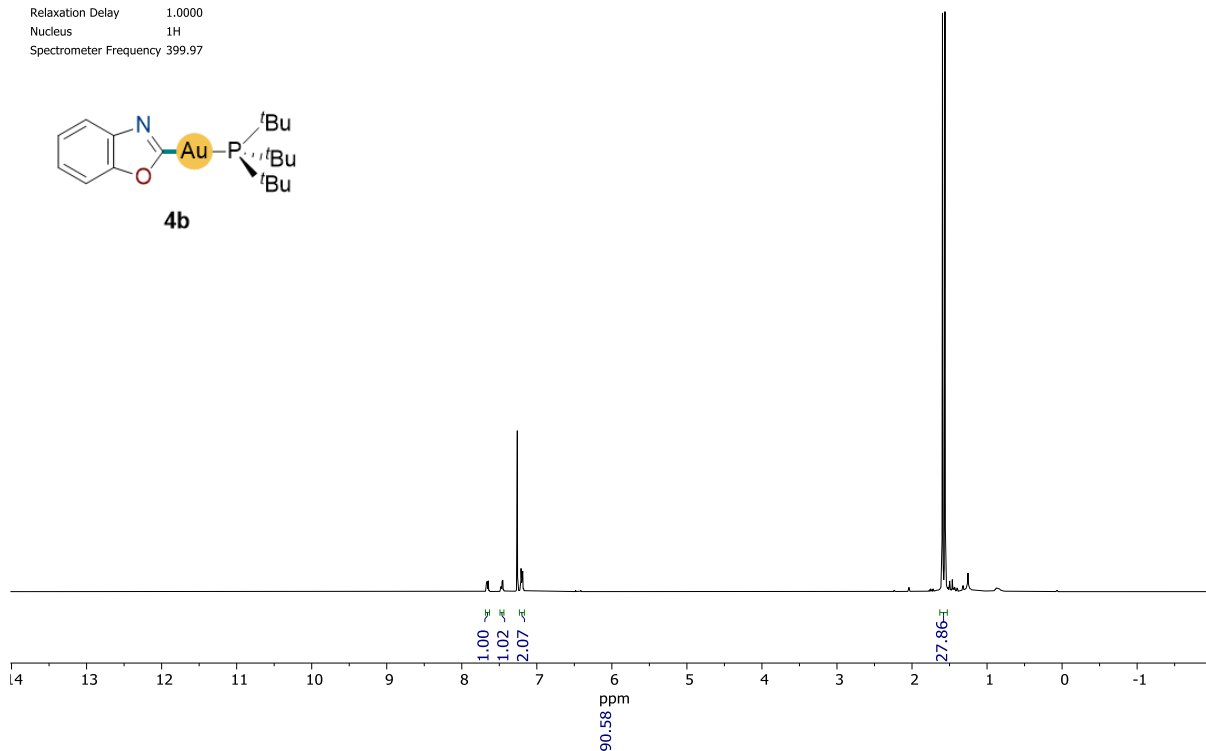

Title ZXG-29-1-col-f-all-dry\_PHOSPHORUS\_01  
 Acquisition Date 2020-04-23T09:36:21  
 Solvent cdd3  
 Number of Scans 64  
 Receiver Gain 50  
 Relaxation Delay 1.0000  
 Nucleus  $^{31}\text{P}$   
 Spectrometer Frequency 161.92

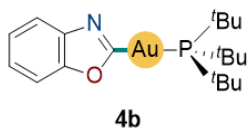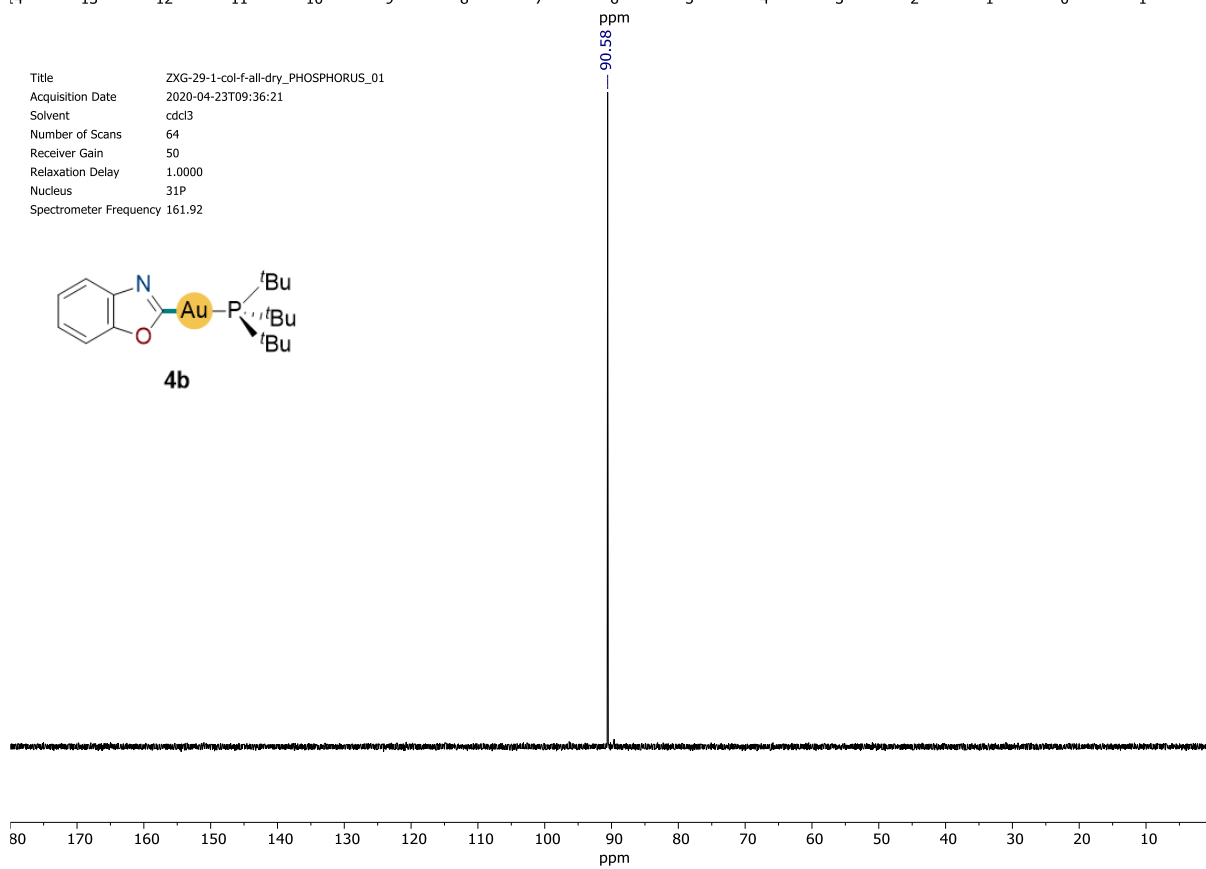

Title FI-326-03-longd1-CDCl3\_PROTON\_01  
 Solvent cdd3  
 Number of Scans 16  
 Receiver Gain 30  
 Relaxation Delay 25.0000  
 Acquisition Date 2019-10-18T14:15:50  
 Spectrometer Frequency 399.97  
 Nucleus 1H

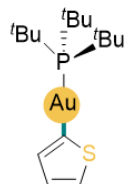

**4c**

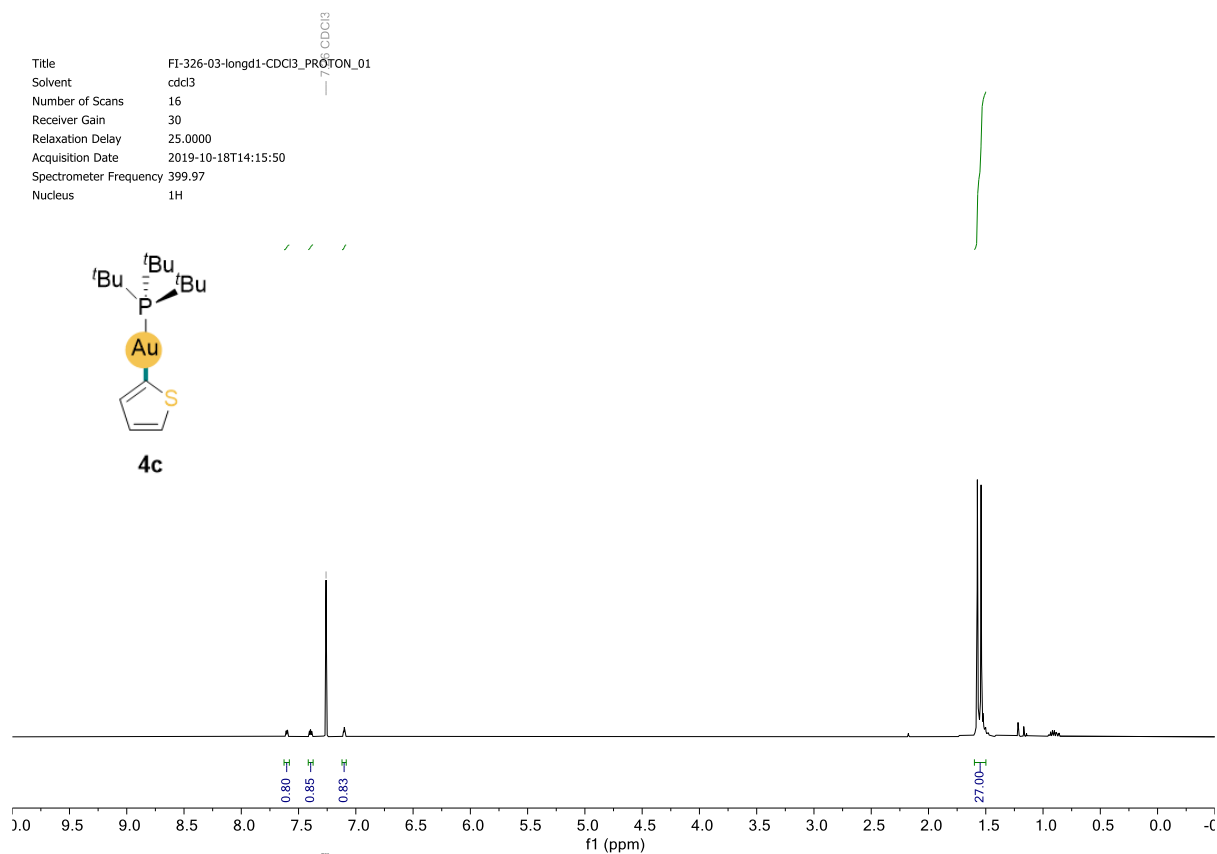

Title FI-326-03-P-decoupl-CDCl3  
 Solvent cdd3  
 Number of Scans 32  
 Receiver Gain 30  
 Relaxation Delay 2.0000  
 Acquisition Date 2019-10-18T18:46:49  
 Decoupler nuclei P31  
 Decoupler mode nny  
 Spectrometer Frequency 399.97  
 Nucleus 1H

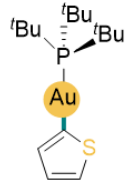

**4c**

**31P Decoupled**

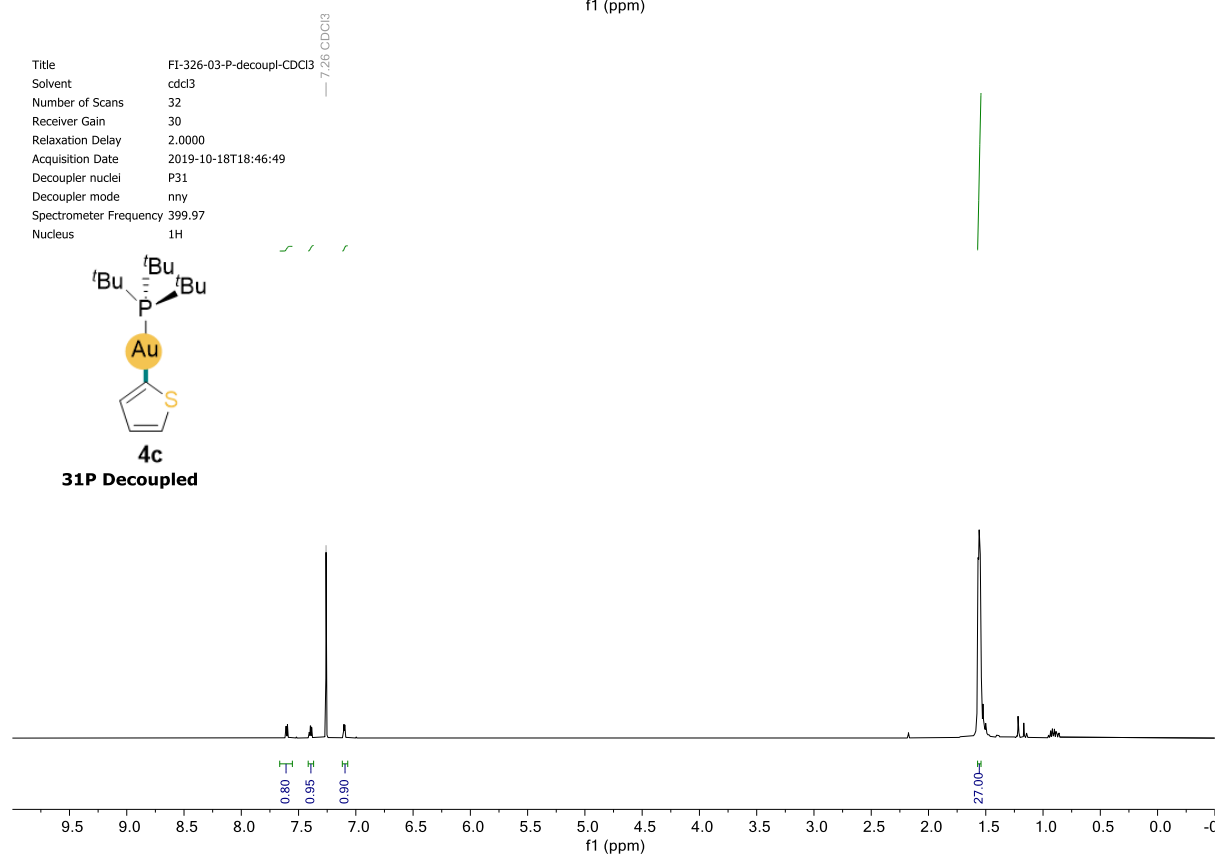

Title FI-326-03-carbon-CDCl3\_CARBON\_01  
 Solvent ccd3  
 Number of Scans 512  
 Receiver Gain 30  
 Relaxation Delay 1.0000  
 Acquisition Date 2019-10-18T14:30:15  
 Spectrometer Frequency 100.57  
 Nucleus 13C

132.62  
 132.52  
 127.25  
 126.75  
 126.61

77.48  
 77.18  
 77.16 CDCl3  
 76.85

39.15  
 38.99  
 32.63  
 32.59

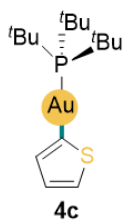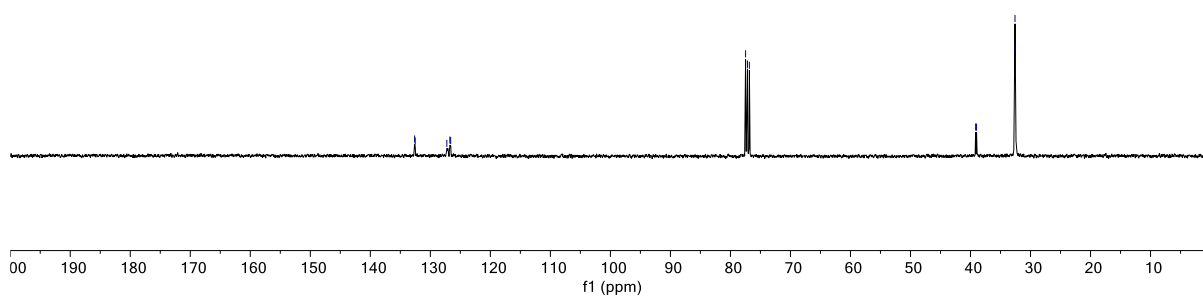

Title FI-326-03-longd1-CDCl3\_PHOSPHORUS\_01  
 Solvent ccd3  
 Number of Scans 64  
 Receiver Gain 50  
 Relaxation Delay 1.0000  
 Acquisition Date 2019-10-17T11:23:13  
 Spectrometer Frequency 161.92  
 Nucleus 31P

92.13

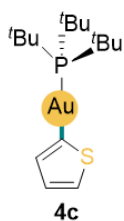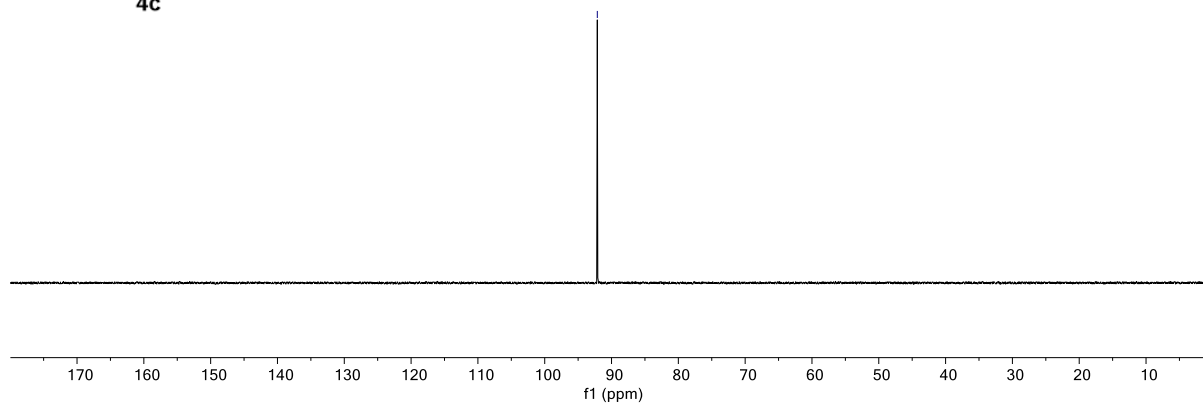

Title FI-393-02-pentthiophene-CDCl<sub>3</sub>\_PROTON\_01  
 Solvent cdd3  
 Number of Scans 8  
 Receiver Gain 34  
 Relaxation Delay 1.0000  
 Acquisition Date 2020-04-23T20:05:13  
 Spectrometer Frequency 399.97  
 Nucleus <sup>1</sup>H

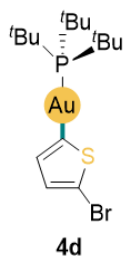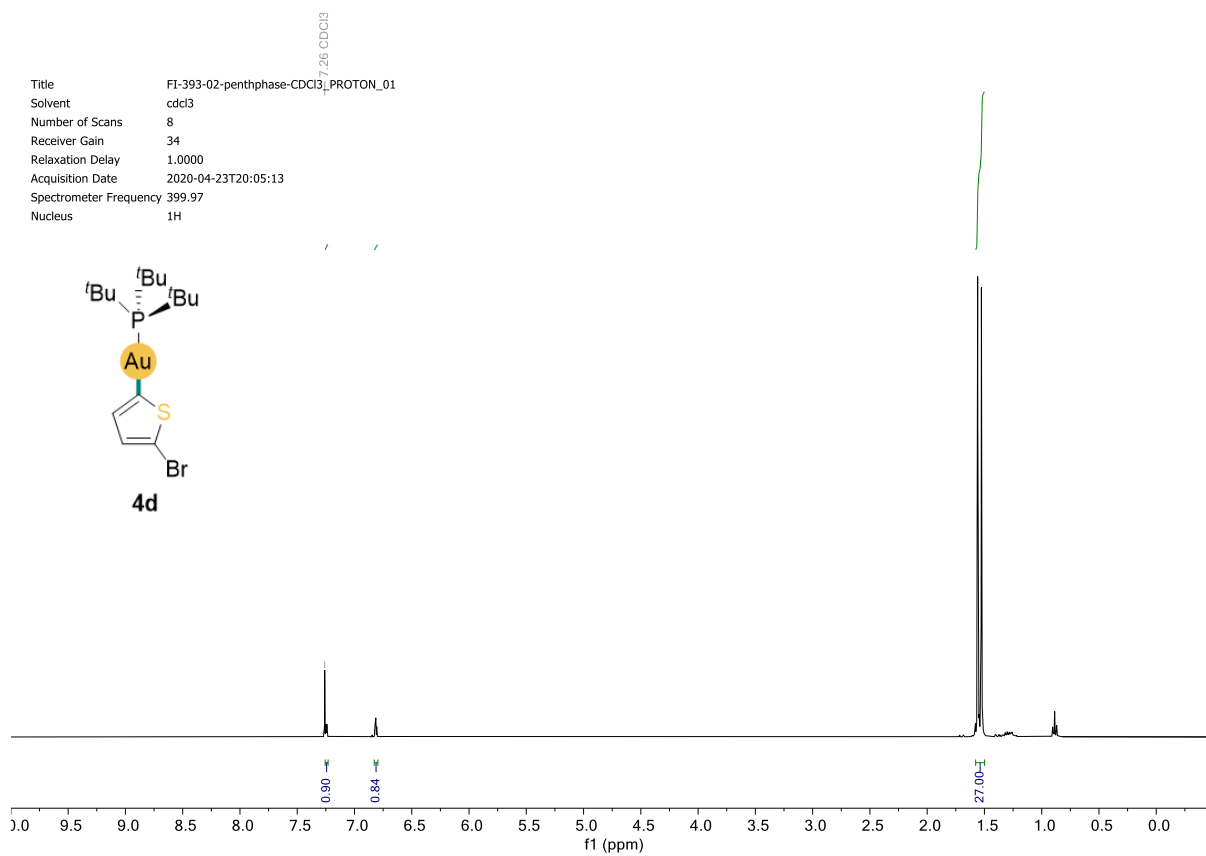

Title FI-393-02-pentthiophene-CDCl<sub>3</sub>\_PHOSPHORUS\_01  
 Solvent cdd3  
 Number of Scans 64  
 Receiver Gain 50  
 Relaxation Delay 1.0000  
 Acquisition Date 2020-04-23T20:07:50  
 Spectrometer Frequency 161.92  
 Nucleus <sup>31</sup>P

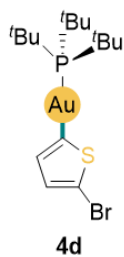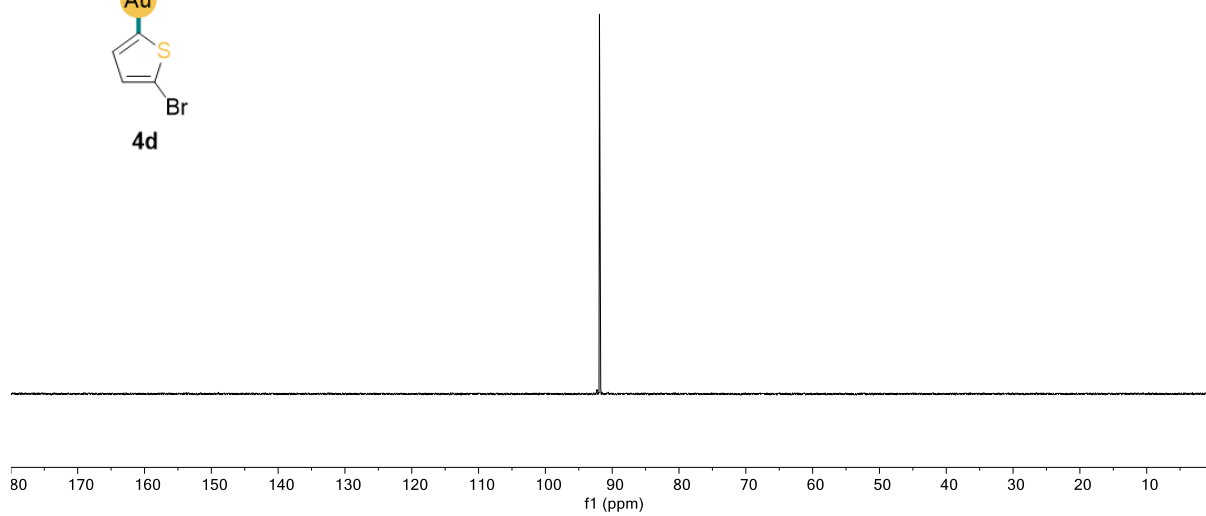

Title ZXG-30-1-col-f-all-dry\_PROTON\_01  
 Acquisition Date 2020-04-24T09:33:56  
 Solvent cdd3  
 Number of Scans 32  
 Receiver Gain 42  
 Relaxation Delay 1.0000  
 Nucleus <sup>1</sup>H  
 Spectrometer Frequency 399.97

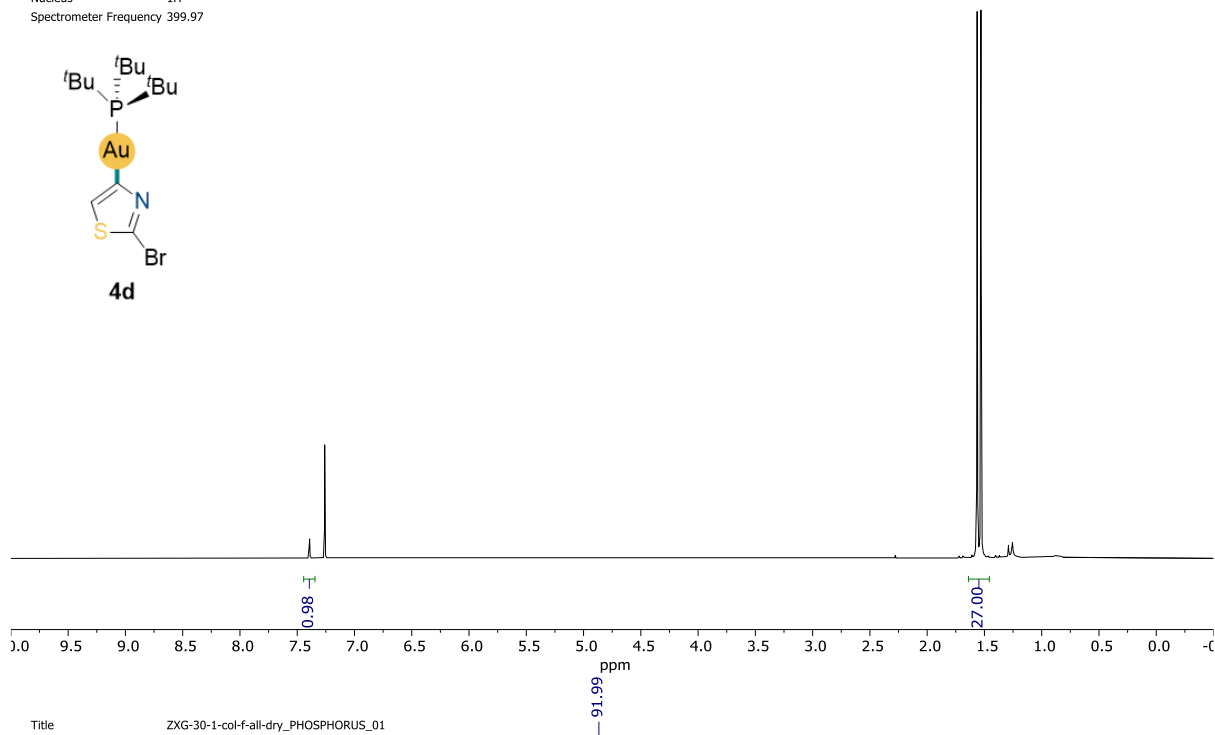

Title ZXG-30-1-col-f-all-dry\_PHOSPHORUS\_01  
 Acquisition Date 2020-04-24T09:38:26  
 Solvent cdd3  
 Number of Scans 64  
 Receiver Gain 50  
 Relaxation Delay 1.0000  
 Nucleus <sup>31</sup>P  
 Spectrometer Frequency 161.92

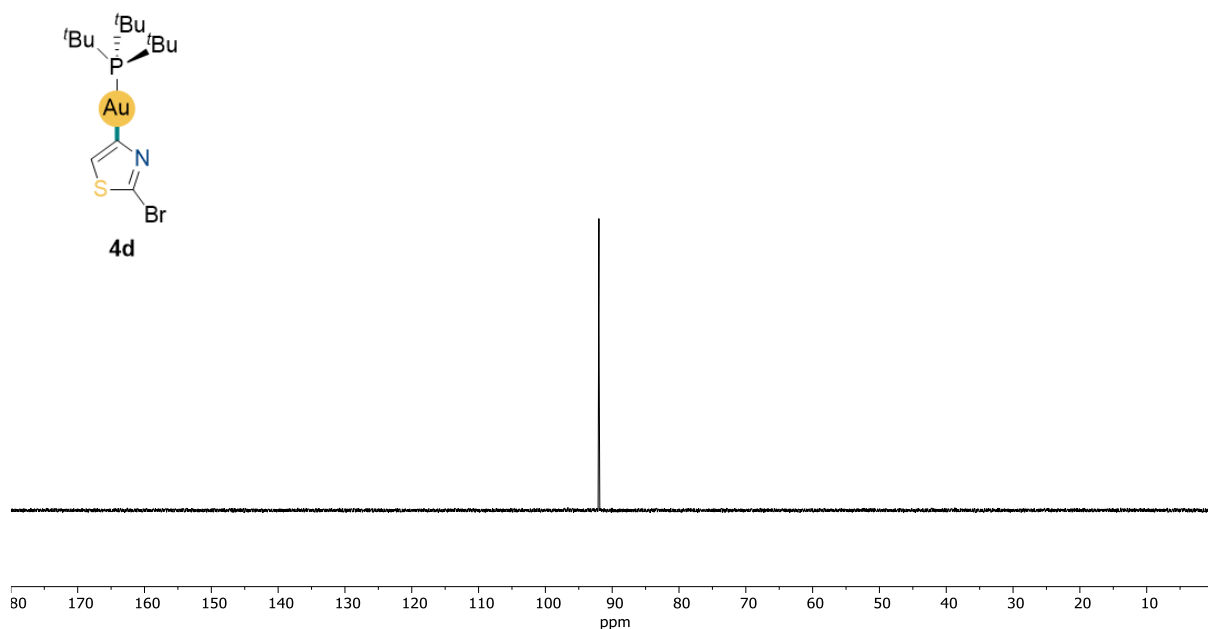



## **Au NHC complexes (Scheme 4)**

Title FI-325-02-tbuok-CDCl3\_PROTON\_01  
 Solvent cdd3  
 Number of Scans 8  
 Receiver Gain 36  
 Relaxation Delay 1.0000  
 Acquisition Date 2019-09-03T19:39:19  
 Spectrometer Frequency 399.97  
 Nucleus 1H

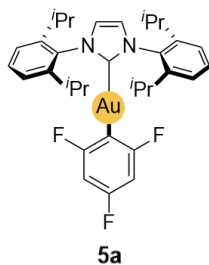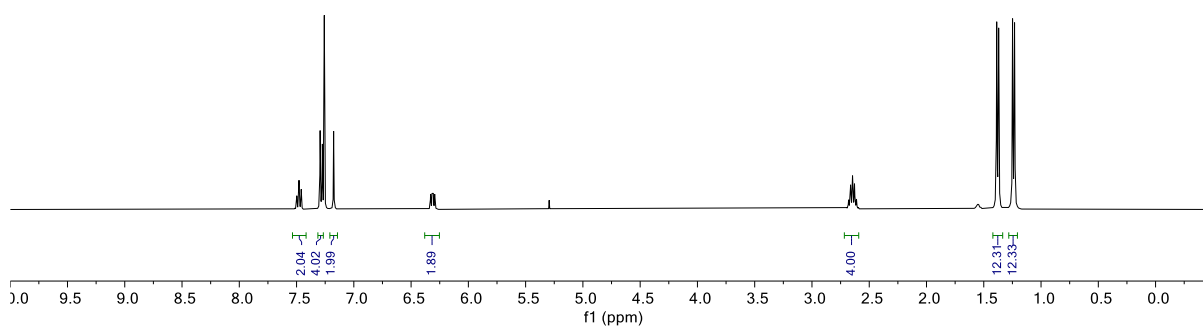

Title FI-325-02-tbuok-CDCl3\_FLUORINE\_01  
 Solvent cdd3  
 Number of Scans 16  
 Receiver Gain 60  
 Relaxation Delay 1.0000  
 Acquisition Date 2019-09-03T19:42:37  
 Spectrometer Frequency 376.31  
 Nucleus 19F

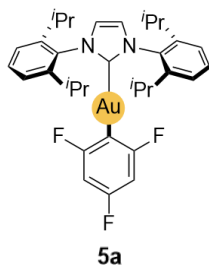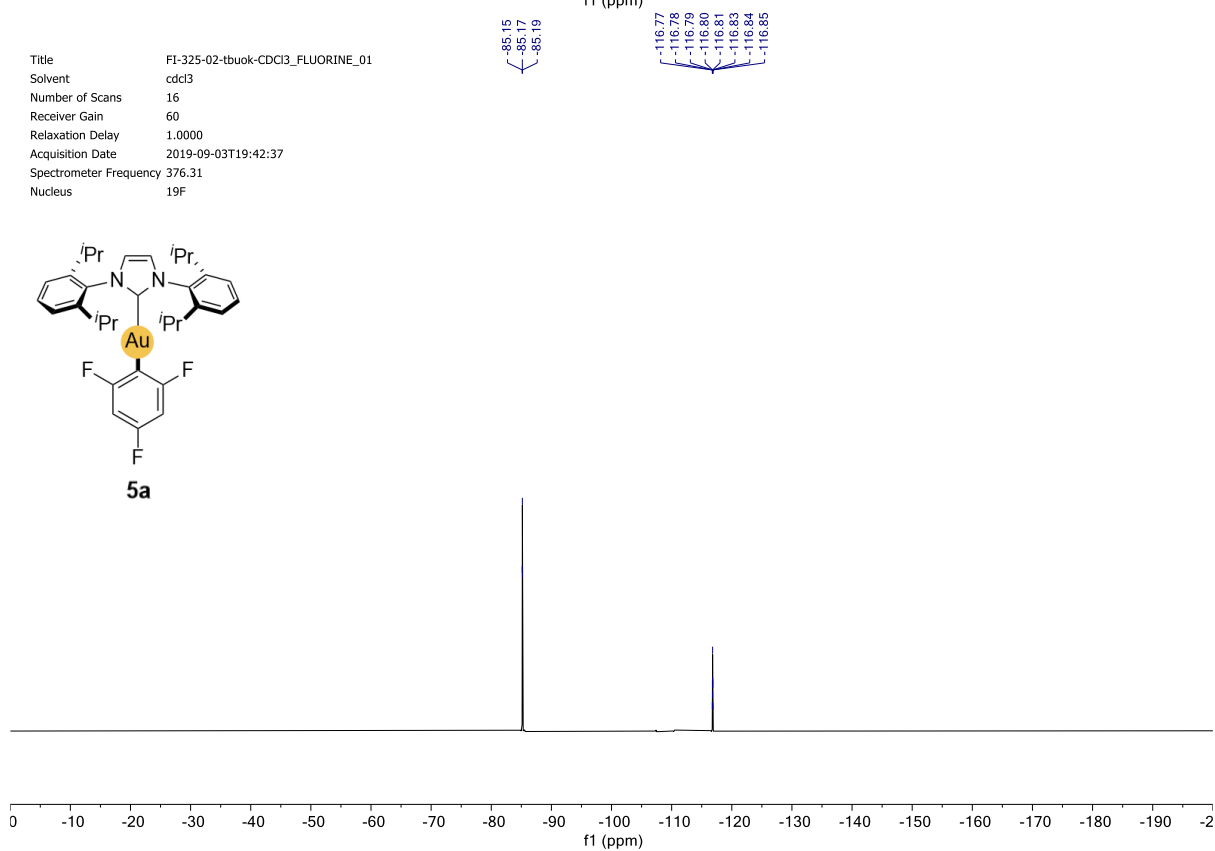

Title ZXG-23-3-filter\_PROTON\_01  
Acquisition Date 2020-04-24T17:22:58  
Solvent ccd3  
Number of Scans 32  
Receiver Gain 42  
Relaxation Delay 1.0000  
Nucleus <sup>1</sup>H  
Spectrometer Frequency 399.97

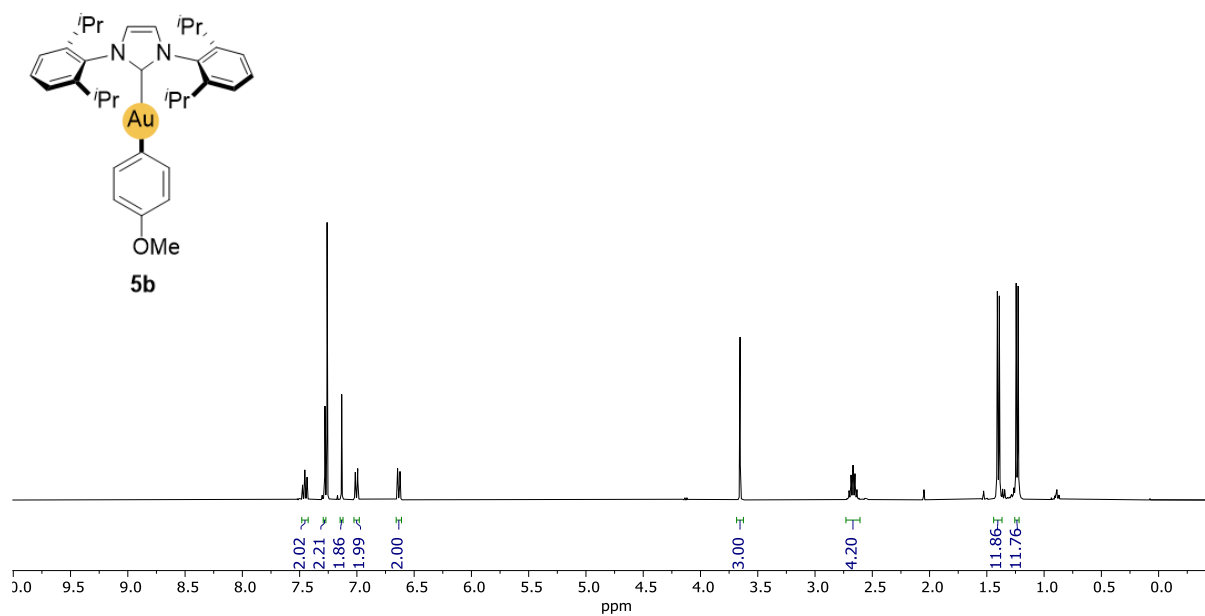

Title ZXG-3-5-filter\_PROTON\_01  
 Acquisition Date 2020-04-24T09:21:04  
 Solvent cdd3  
 Number of Scans 32  
 Receiver Gain 44  
 Relaxation Delay 1.0000  
 Nucleus <sup>1</sup>H  
 Spectrometer Frequency 399.97

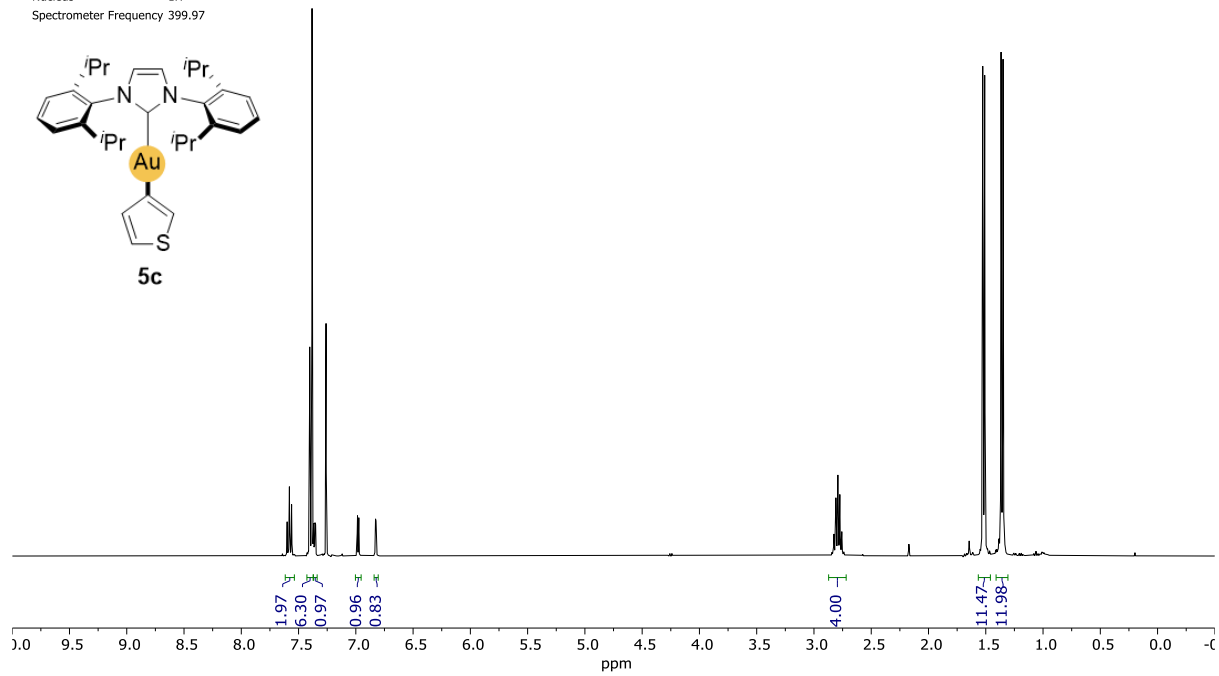

Title ZXG-31-filter-SI\_PROTON\_01  
 Acquisition Date 2020-04-25T00:10:35  
 Solvent cdd3  
 Number of Scans 32  
 Receiver Gain 46  
 Relaxation Delay 1.0000  
 Nucleus <sup>1</sup>H  
 Spectrometer Frequency 399.97

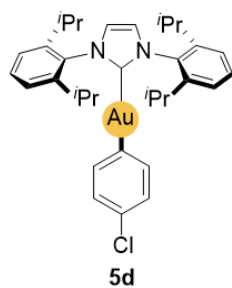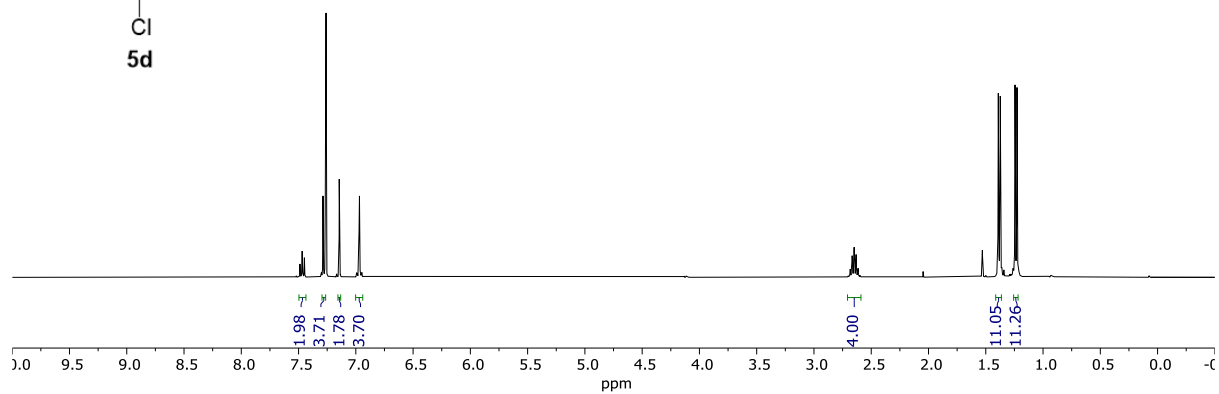

Title FI-Au-O-pyrenen-NHC\_PROTON\_01  
 Solvent ccd3  
 Number of Scans 8  
 Receiver Gain 38  
 Relaxation Delay 1.0000  
 Acquisition Date 2018-05-14T23:26:18  
 Spectrometer Frequency 399.97  
 Nucleus <sup>1</sup>H

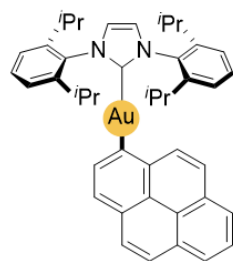

**5e**

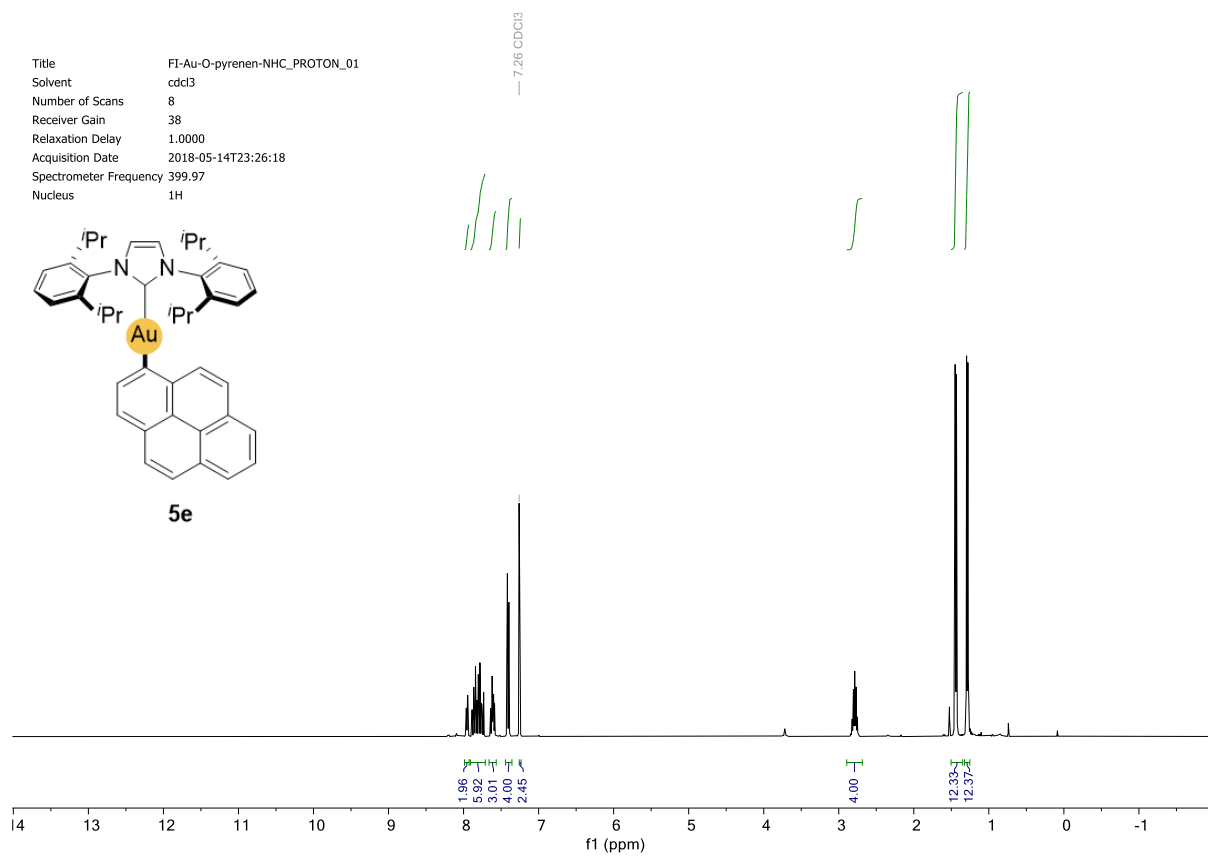

## **Au(I) complexes of bioactive scaffolds (Figure 2)**

Title FI-386-01-EtoAcWash-remainsolid-CDCl3\_PROTON\_01  
 Solvent ccd3  
 Number of Scans 8  
 Receiver Gain 54  
 Relaxation Delay 1.0000  
 Acquisition Date 2020-04-16T20:31:48  
 Spectrometer Frequency 399.92  
 Nucleus 1H

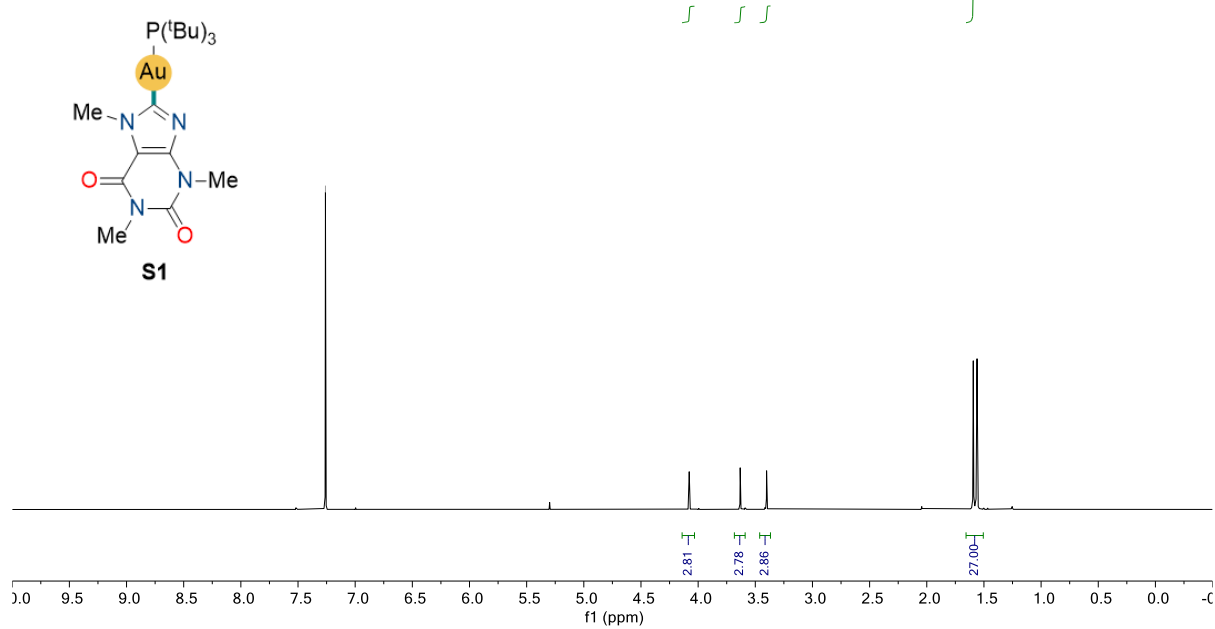

Title FI-386-01-EtoAcWash-remainsolid-CDCl3\_PHOSPHORUS\_01  
 Solvent ccd3  
 Number of Scans 64  
 Receiver Gain 50  
 Relaxation Delay 1.0000  
 Acquisition Date 2020-04-16T20:36:05  
 Spectrometer Frequency 161.90  
 Nucleus 31P

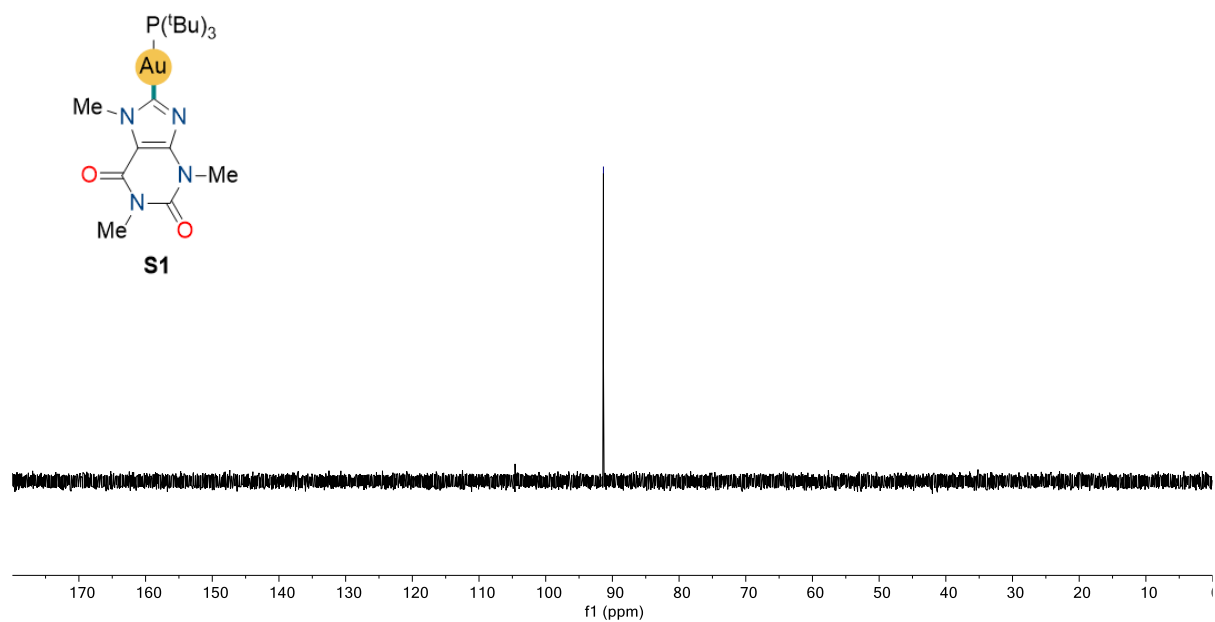



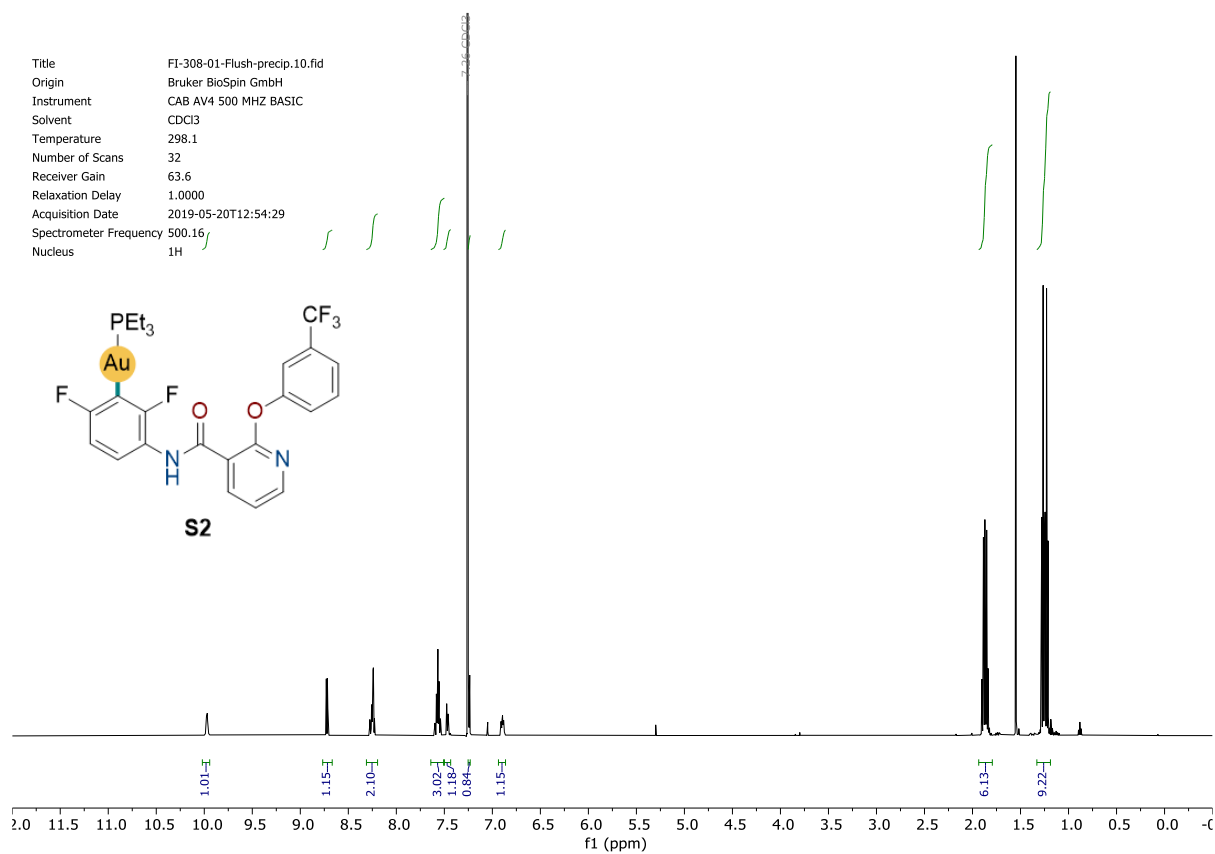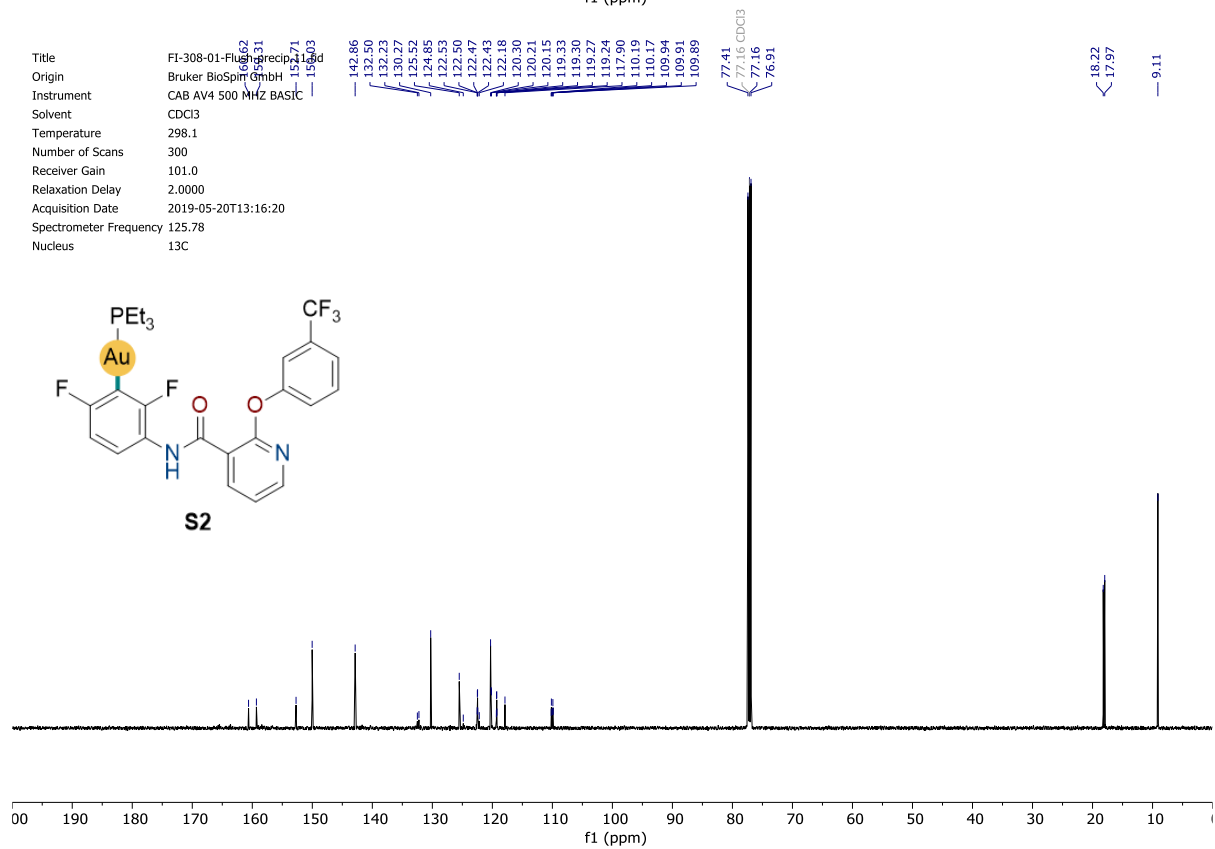

| Year | Number of people (millions) |
|------|-----------------------------|
| 1990 | 62.63                       |
| 2000 | 104.68                      |

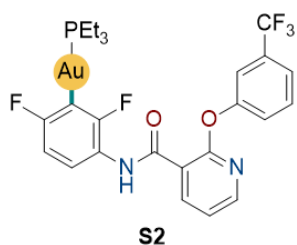
$$\begin{matrix} 40.24 \\ 40.19 \end{matrix}$$
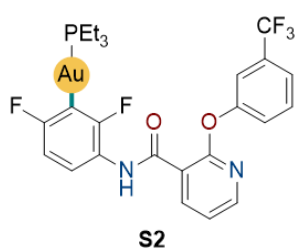

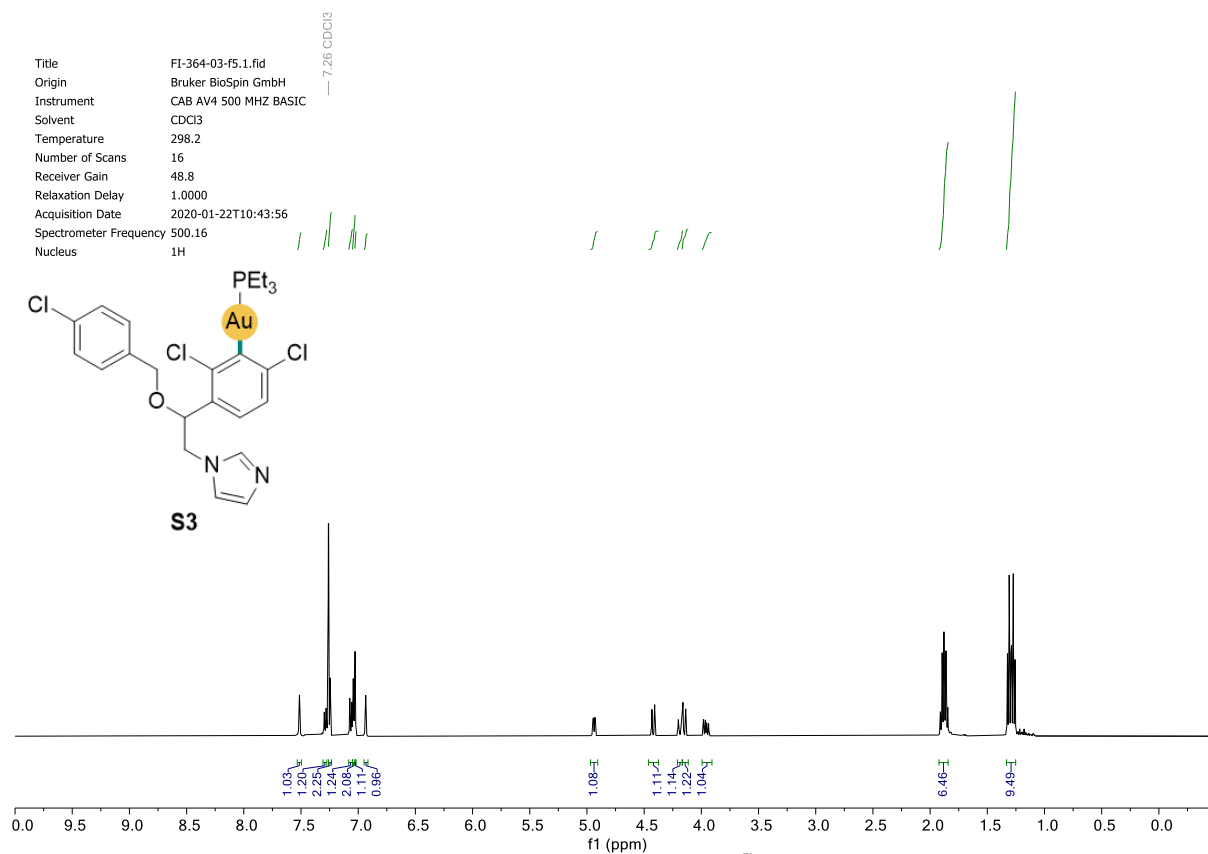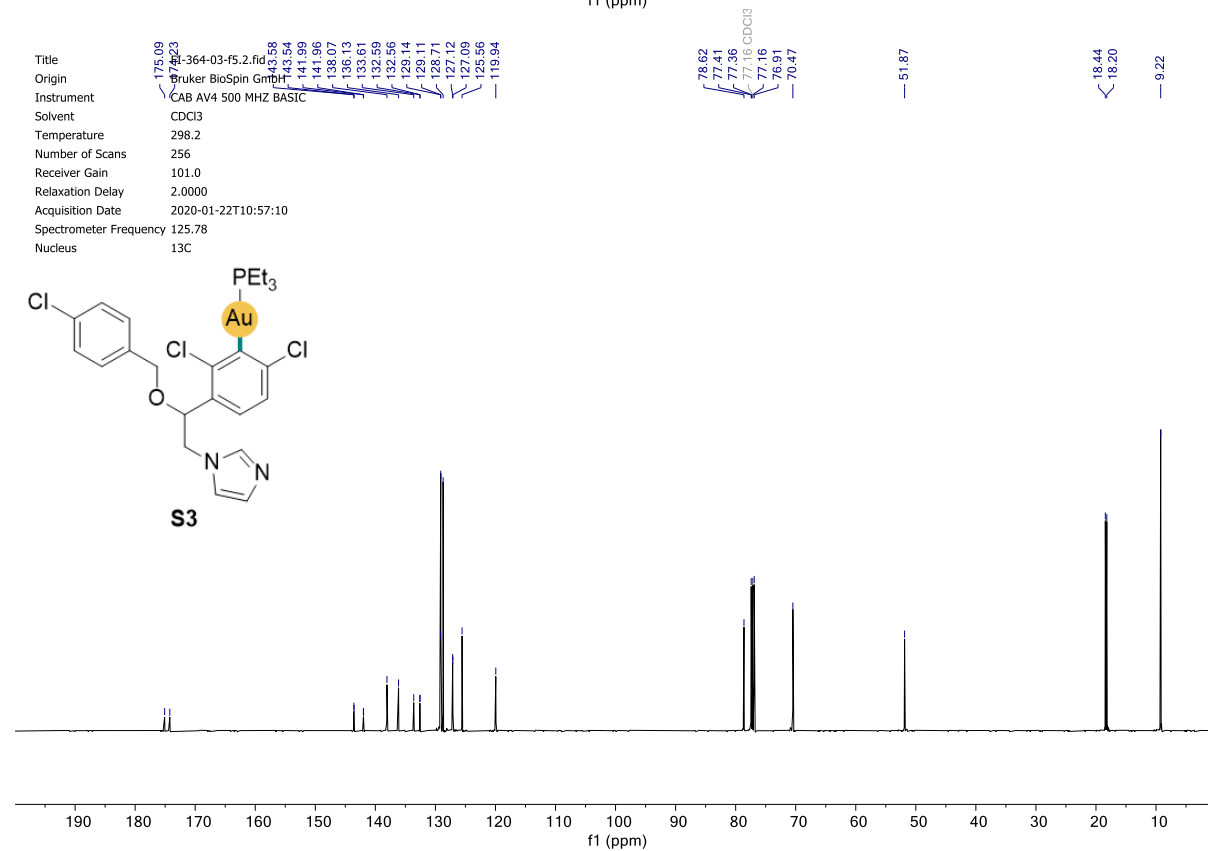

Title FI-364-03-F5-CDCl3\_PHOSPHORUS\_01  
Solvent cdc13  
Number of Scans 64  
Receiver Gain 50  
Relaxation Delay 1.0000  
Acquisition Date 2020-01-22T09:54:40  
Spectrometer Frequency 161.92  
Nucleus 31P

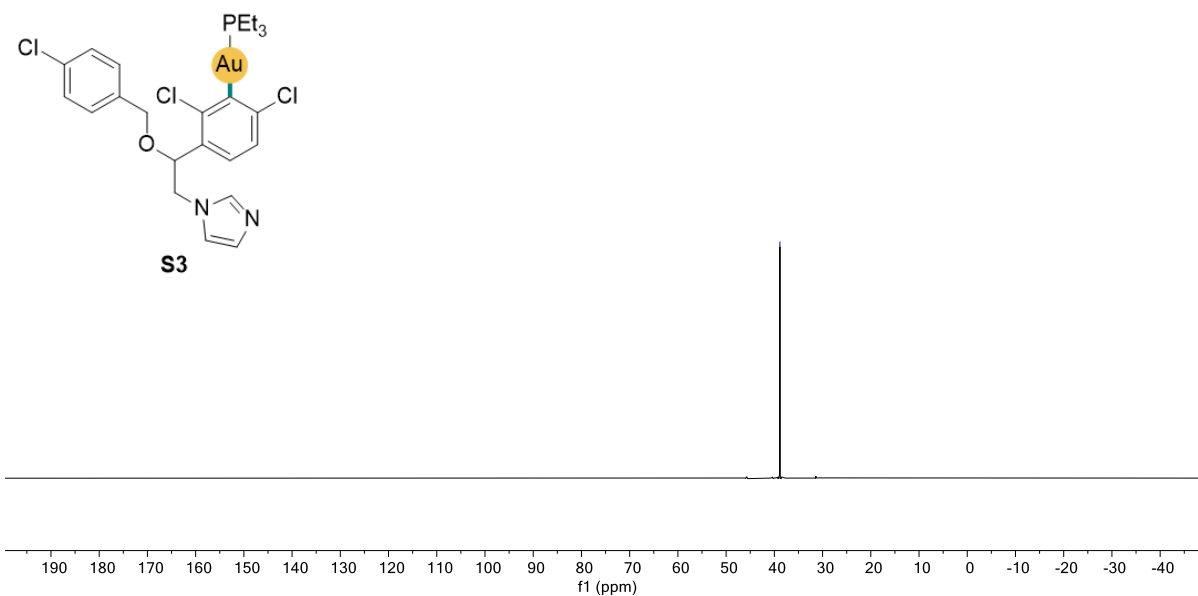

## **Mechanistic investigation (Scheme 7 and SI)**

Title FI-369-09-benzeneLAG-C6D6\_PROTON\_01  
 Solvent c6d6  
 Number of Scans 8  
 Receiver Gain 38  
 Relaxation Delay 1.0000  
 Acquisition Date 2020-05-15T19:23:08  
 Spectrometer Frequency 399.97  
 Nucleus <sup>1</sup>H

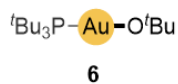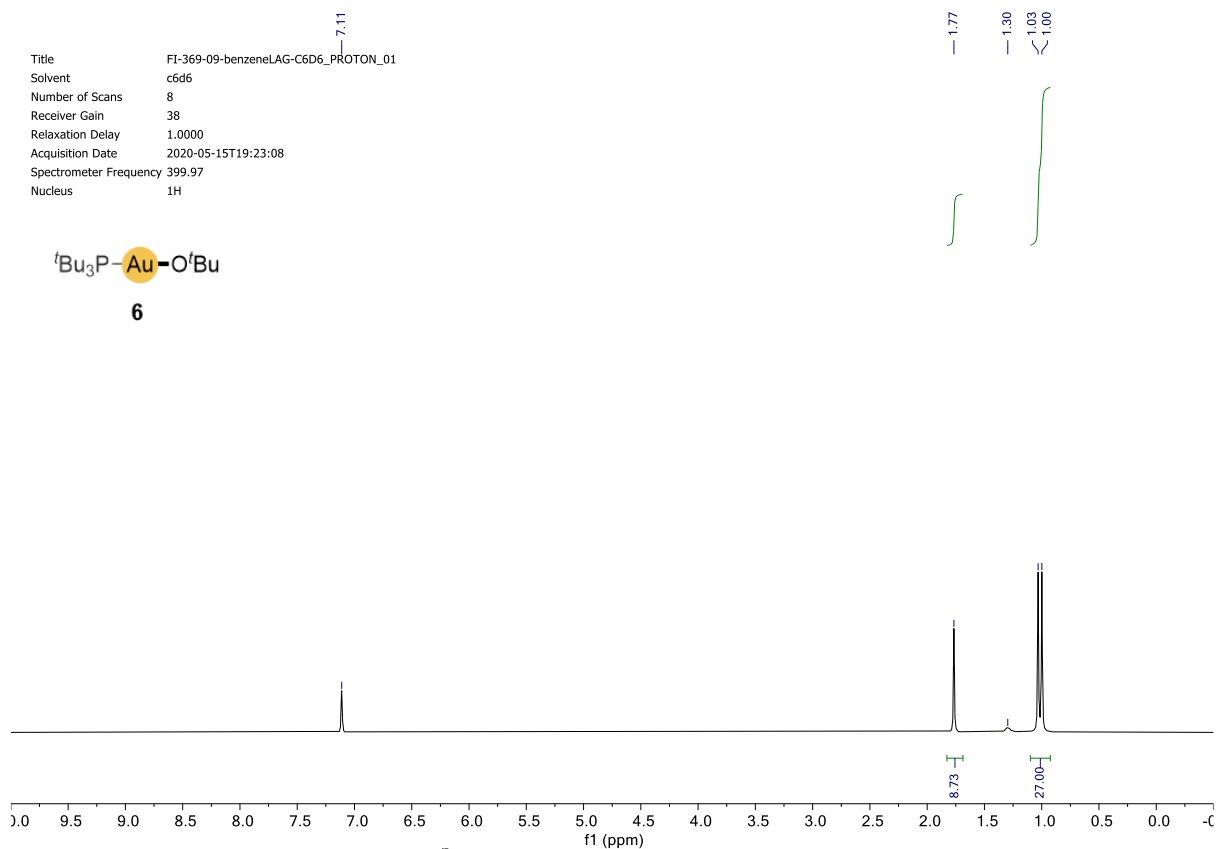

Title FI-369-09-benzeneLAG-C6D6\_CARBO\_01  
 Solvent c6d6  
 Number of Scans 10000  
 Receiver Gain 30  
 Relaxation Delay 1.0000  
 Acquisition Date 2020-05-07T19:53:23  
 Spectrometer Frequency 100.57  
 Nucleus <sup>13</sup>C

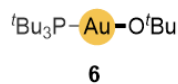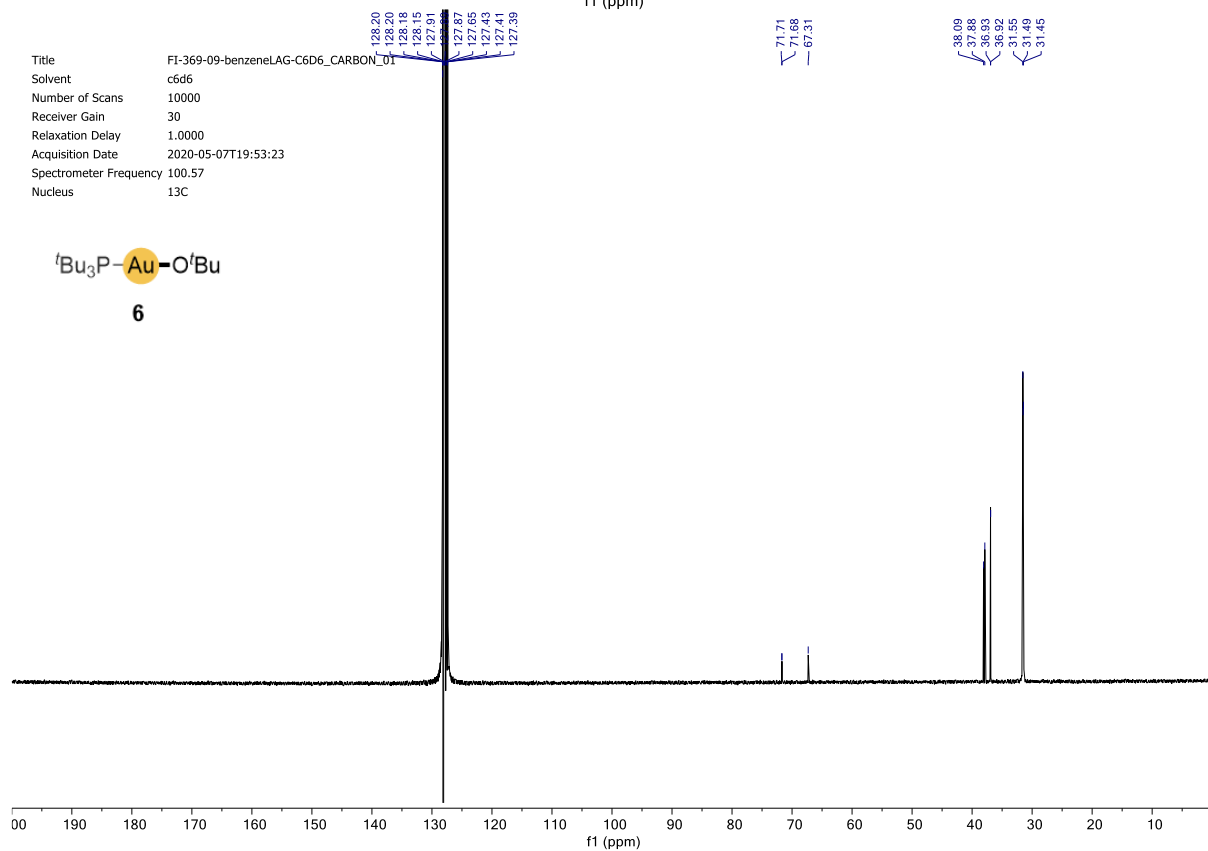

Title FI-369-09-0\_1mLC6H6add-C6D6\_PHOSPHORUS\_01  
Solvent c6d6  
Number of Scans 128  
Receiver Gain 50  
Relaxation Delay 1.0000  
Acquisition Date 2020-05-07T19:39:29  
Spectrometer Frequency 161.92  
Nucleus <sup>31</sup>P

— 81.43

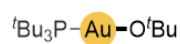

**6**

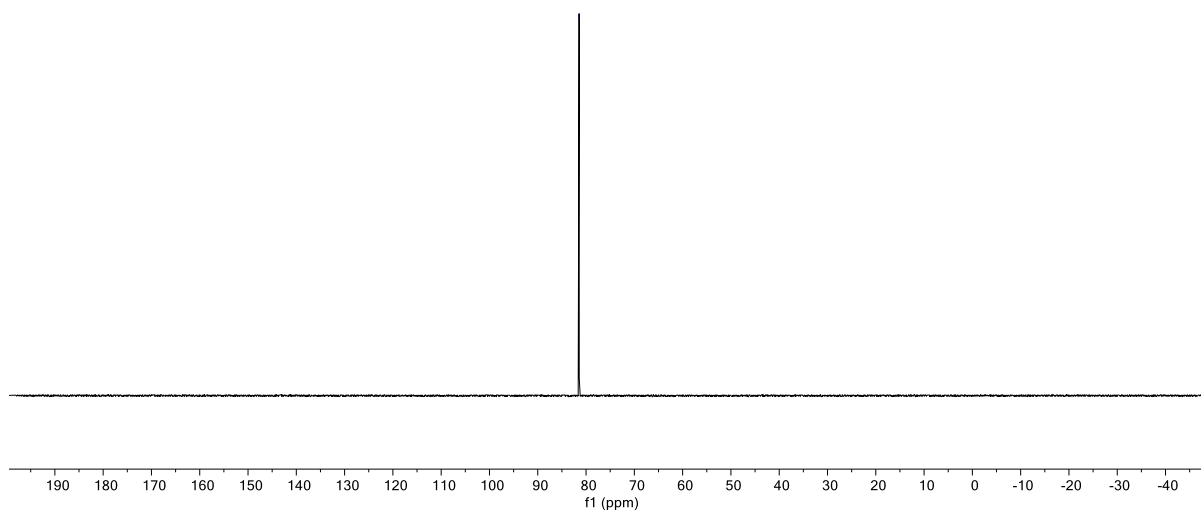

Title FI-393-02-F2prepp-long-CDCl3\_PROTON\_01  
 Solvent cdd3  
 Number of Scans 512  
 Receiver Gain 54  
 Relaxation Delay 1.0000  
 Acquisition Date 2020-05-06T02:41:04  
 Spectrometer Frequency 399.97  
 Nucleus <sup>1</sup>H

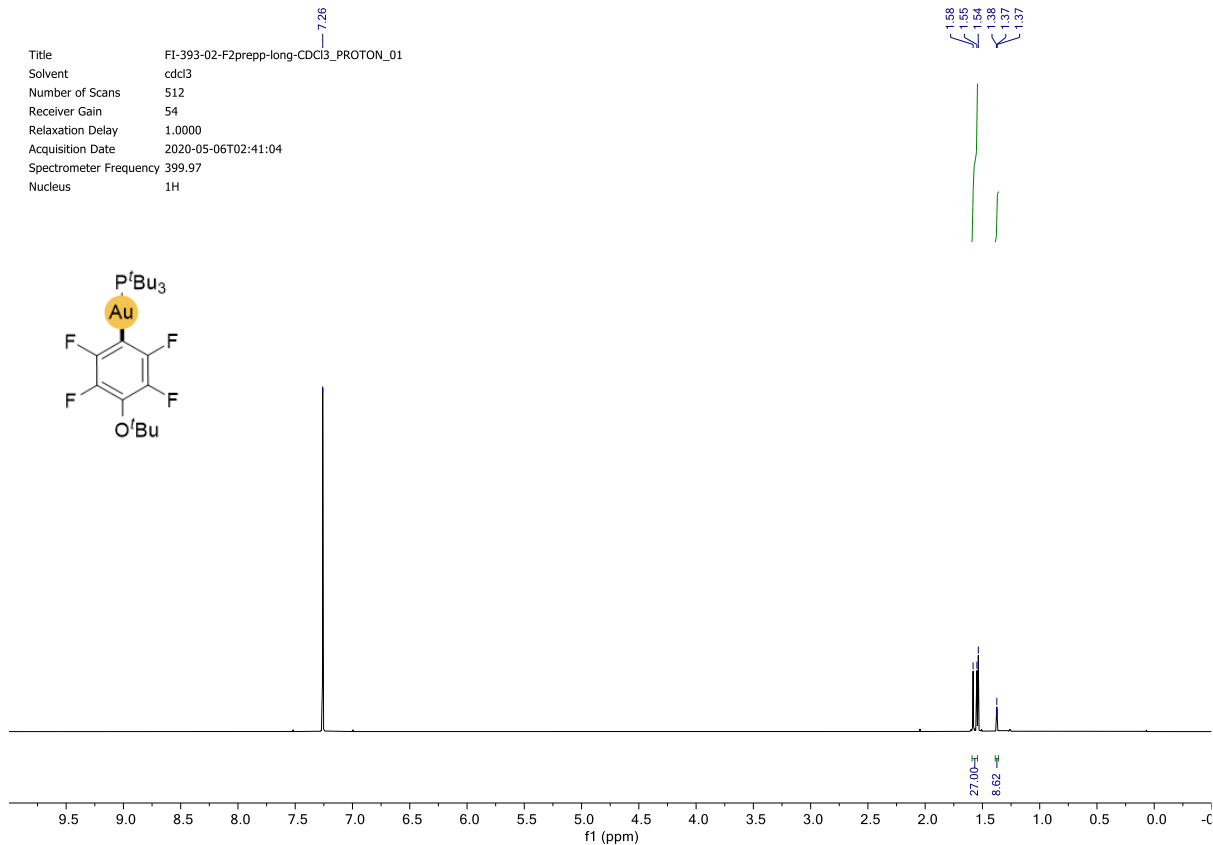

Title FI-393-02-F2prepp-long-CDCl3\_FLUORINE\_01  
 Solvent cdd3  
 Number of Scans 1024  
 Receiver Gain 60  
 Relaxation Delay 1.0000  
 Acquisition Date 2020-05-06T03:14:19  
 Spectrometer Frequency 376.31  
 Nucleus <sup>19</sup>F

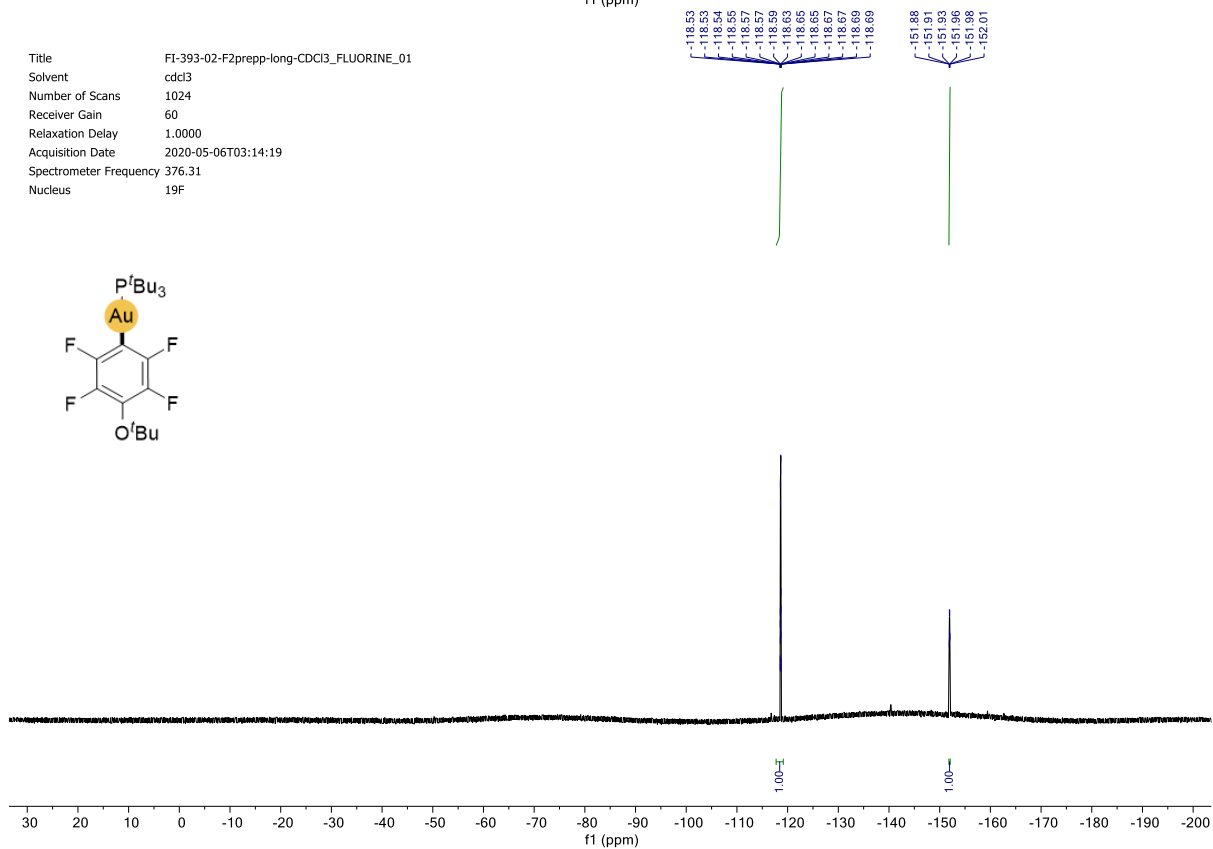



Title FI-393-02-F2prepp-long-CDCl3\_PHOSPHORUS\_01  
Solvent cdd3  
Number of Scans 4096  
Receiver Gain 50  
Relaxation Delay 1.0000  
Acquisition Date 2020-05-06T03:46:47  
Spectrometer Frequency 161.92  
Nucleus 31P

92.24  
92.20  
92.16  
92.12  
92.07

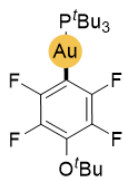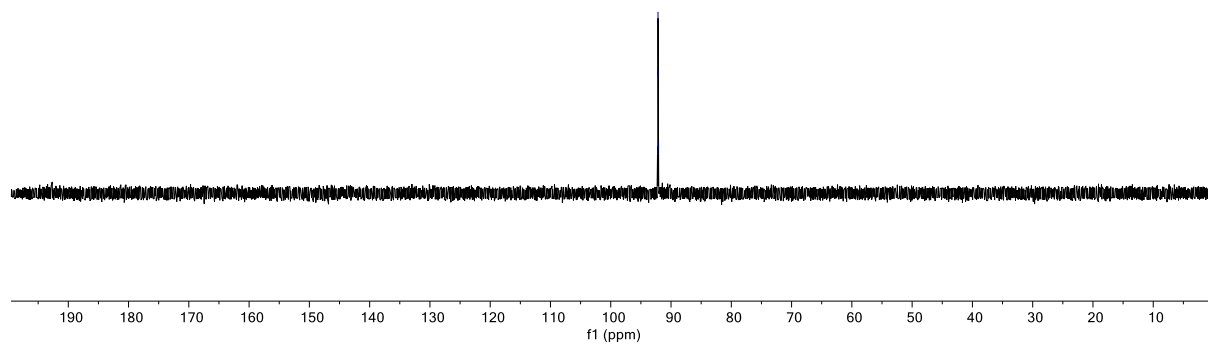

Supplement: d0gc02263b1.pdf [file d0gc02263b1.pdf]
